# Supplementary material for: Rh(iii)-Catalyzed chemo-, regio- and stereoselective carboamination of sulfonyl allenes with N-phenoxy amides or N-enoxy imides
Source: Royal Society of Chemistry journal article supplement (doi:10.1039/d2cc02982k), 2022-01-01

## *Supplementary Information*

### **Rh(III)-Catalyzed chemo-, regio- and stereoselective carboamination of sulfonyl allenes with *N*-phenoxy amides or *N*-enoxy imides**

Min Wu,<sup>§</sup> Haiman Zhang,<sup>§</sup> Ting Wang, Shuang Lin, Ziyang Guo, Hui Gao, Zhi Zhou\* and  
Wei Yi\*

Guangzhou Municipal and Guangdong Provincial Key Laboratory of Molecular Target & Clinical Pharmacology, the NMPA and State Key Laboratory of Respiratory Disease, School of Pharmaceutical Sciences and the Fifth Affiliated Hospital, Guangzhou Medical University, Guangzhou, Guangdong 511436, China.

<sup>§</sup>These authors contributed equally to this work.

\*E-mail: zhouzhi@gzhmu.edu.cn and yiwei@gzhmu.edu.cn

#### **Contents**

|                                                                                    |     |
|------------------------------------------------------------------------------------|-----|
| I. General.....                                                                    | S2  |
| II. Experimental Information and Characterization Data.....                        | S2  |
| III. Synthetic Applications.....                                                   | S28 |
| IV. X-Ray Characteristic Data.....                                                 | S35 |
| V. References.....                                                                 | S36 |
| VI. Copies of <sup>1</sup> H, <sup>13</sup> C and <sup>19</sup> F NMR Spectra..... | S37 |

## I. General

NMR spectra were recorded on JEOL 400 NMR ( $^1\text{H}$  400 MHz;  $^{13}\text{C}$  100 MHz) in either  $\text{CDCl}_3$  or  $\text{DMSO}-d_6$ . Abbreviations for data quoted are s, singlet; brs, broad singlet; d, doublet; t, triplet; dd, doublet of doublets; m, multiplet. The residual solvent signals were used as references and the chemical shifts converted to the TMS scale ( $\text{CDCl}_3$ :  $\delta_{\text{H}} = 7.26$  ppm,  $\delta_{\text{C}} = 77.16$  ppm;  $d_6$ -DMSO:  $\delta_{\text{H}} = 2.50$  ppm,  $\delta_{\text{C}} = 39.52$  ppm). Mass spectra and high-resolution mass spectra were measured on an agilent TOF-G6230B mass spectrometer and Thermo-DFS mass spectrometer. Thin-layer chromatographies were done on pre-coated silica gel 60 F254 plates (Merck). Silica gel 60H (200-300 mesh) and preparative TLC (200x200 mm, 0.2-0.25 mm in thickness) manufactured by Qingdao Haiyang Chemical Group Co. (China) were used for general chromatography.  $[\text{Cp}^*\text{IrCl}_2]_2$ ,  $[\text{Cp}^*\text{RhCl}_2]_2$ ,  $[\text{Ru}(p\text{-cymene})\text{Cl}_2]_2$  and  $\text{CsOAc}$  were purchased from Aldrich and used without further purification. *N*-phenoxy amides,<sup>S1</sup> *N*-enoxy imides<sup>S2</sup> and the allene substrates<sup>S3</sup> were synthesized according to published procedures. Other chemicals were purchased from commercial suppliers and were dried and purified when necessary. No attempts were made to optimize yields for substrate synthesis.

## II. Experimental Information and Characterization Data

### Optimization studies:

The mixture of *N*-phenoxy amide **1a** (0.1 mmol, 1.0 equiv), sulfonyl allene **2a** (0.1 mmol, 1.0 equiv),  $[\text{Cp}^*\text{RhCl}_2]_2$  (2.5 mol %) and base (1 equiv) in the solvent was stirred in an oil bath without exclusion of air or moisture. Afterwards, it was diluted with EtOAc and filtered through a short silica gel column to remove the metal residues. Then, the reaction mixture was concentrated and purified by preparative TLC (eluent: PE/EA = 3/1) to afford the corresponding product **3aa**.

**Table S1.** Conditions Screening for the Synthesis of **3aa**.<sup>a</sup>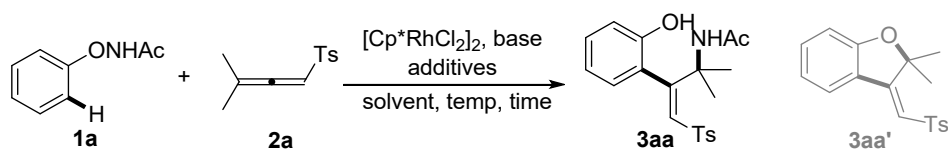

| #                                     | solvent | Temp (°C) | base                           | additive          | Time (h) | Yield (%) <sup>b</sup> |             |
|---------------------------------------|---------|-----------|--------------------------------|-------------------|----------|------------------------|-------------|
|                                       |         |           |                                |                   |          | <b>3aa</b>             | <b>3aa'</b> |
| <i>solvent screening</i>              |         |           |                                |                   |          |                        |             |
| 1                                     | MeCN    | 40        | NaOAc                          | /                 | 12       | 24                     | trace       |
| 2                                     | DCE     | 40        | NaOAc                          | /                 | 12       | 27                     | trace       |
| 3                                     | Dioxane | 40        | NaOAc                          | /                 | 12       | 74                     | nd          |
| 4                                     | DMF     | 40        | NaOAc                          | /                 | 12       | trace                  | nd          |
| 5                                     | Toluene | 40        | NaOAc                          | /                 | 12       | 53                     | trace       |
| 6                                     | Acetone | 40        | NaOAc                          | /                 | 12       | 39                     | trace       |
| 7                                     | HFIP    | 40        | NaOAc                          | /                 | 12       | trace                  | nd          |
| 8                                     | DMSO    | 40        | NaOAc                          | /                 | 12       | nd                     | nd          |
| 9                                     | THF     | 40        | NaOAc                          | /                 | 12       | 74                     | nd          |
| <i>reaction temperature screening</i> |         |           |                                |                   |          |                        |             |
| 10                                    | THF     | rt        | NaOAc                          | /                 | 12       | 57                     | nd          |
| 11                                    | THF     | 60        | NaOAc                          | /                 | 12       | 66                     | nd          |
| 12                                    | THF     | 80        | NaOAc                          | /                 | 12       | 63                     | nd          |
| <i>additive screening</i>             |         |           |                                |                   |          |                        |             |
| 13                                    | THF     | rt        | NaOAc                          | HOAc              | 12       | 36                     | 11          |
| 14                                    | THF     | rt        | NaOAc                          | PivOH             | 12       | 28                     | trace       |
| 15                                    | THF     | rt        | NaOAc                          | 4ÅMS              | 12       | 53                     | trace       |
| 16                                    | THF     | rt        | NaOAc                          | Amberlite IRA-400 | 12       | 50                     | nd          |
| 17                                    | THF     | rt        | NaOAc                          | Amberlite IR-120  | 12       | 38                     | nd          |
| <i>base screening</i>                 |         |           |                                |                   |          |                        |             |
| 18                                    | THF     | rt        | KOAc                           | /                 | 12       | 37                     | nd          |
| 19                                    | THF     | rt        | CsOAc                          | /                 | 12       | 22                     | nd          |
| 20                                    | THF     | rt        | Zn(OAc) <sub>2</sub>           | /                 | 12       | <10                    | nd          |
| 21                                    | THF     | rt        | Mn(OAc) <sub>2</sub>           | /                 | 12       | 30                     | nd          |
| 22                                    | THF     | rt        | K <sub>2</sub> CO <sub>3</sub> | /                 |          | 28                     | nd          |
| 23                                    | THF     | rt        | KOPiv                          | /                 | 12       | 25                     | nd          |
| 24                                    | THF     | rt        | K <sub>3</sub> PO <sub>4</sub> | /                 | 12       | nd                     | nd          |
| <i>Reaction time screening</i>        |         |           |                                |                   |          |                        |             |
| 25                                    | THF     | rt        | NaOAc                          | /                 | 8        | 50                     | nd          |
| 26                                    | THF     | rt        | NaOAc                          | /                 | 12       | 53                     | nd          |
| 27                                    | THF     | rt        | NaOAc                          | /                 | 16       | 52                     | nd          |
| 28                                    | THF     | rt        | NaOAc                          | /                 | 24       | 53                     | nd          |

<sup>a</sup>Reaction Conditions: **1a** (0.1 mmol), **2a** (0.1 mmol),  $[\text{Cp}^*\text{RhCl}_2]_2$  (2.5 mol %), base (1.0 equiv), solvent (0.5 mL), temperature, time, under air. <sup>b</sup>Isolated yields. nd: not detected.

The mixture of *N*-enoxy imide **4a** (0.1 mmol, 1.0 equiv), sulfonyl allene **2a** (0.1 mmol, 1.0 equiv), [Cp\*RhCl<sub>2</sub>]<sub>2</sub> (2.5 mol %) and base (1 equiv) in the solvent was stirred in an oil bath without exclusion of air or moisture. Afterwards, it was diluted with EtOAc and filtered through a short silica gel column to remove the metal residues. Then, the reaction mixture was concentrated and purified by preparative TLC (eluent: PE/EA = 2/1) to afford the corresponding product **5a**.

**Table S2.** Conditions Screening for the Synthesis of **5a**.<sup>a</sup>

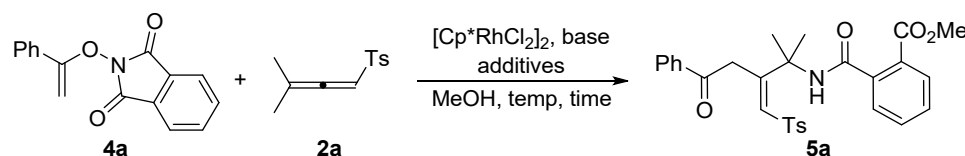

| #                                 | base                            | Temp/°C | additive           | <b>4a:2a</b> | Time/h | yield(%) <sup>b</sup> |
|-----------------------------------|---------------------------------|---------|--------------------|--------------|--------|-----------------------|
| <i>base screening</i>             |                                 |         |                    |              |        |                       |
| 1                                 | KOAc                            | 40      | /                  | 1:1          | 12     | 18                    |
| 2                                 | CsOAc                           | 40      | /                  | 1:1          | 12     | 22                    |
| 3                                 | Zn(OAc) <sub>2</sub>            | 40      | /                  | 1:1          | 12     | trace                 |
| 4                                 | K <sub>2</sub> CO <sub>3</sub>  | 40      | /                  | 1:1          | 12     | trace                 |
| 5                                 | KOPiv                           | 40      | /                  | 1:1          | 12     | 25                    |
| 6                                 | Cs <sub>2</sub> CO <sub>3</sub> | 40      | /                  | 1:1          | 12     | 12                    |
| 7                                 | NaOAc                           | 40      | /                  | 1:1          | 12     | 12                    |
| <i>additive screening</i>         |                                 |         |                    |              |        |                       |
| 8                                 | KOPiv                           | 40      | HOAc               | 1:1          | 12     | <10                   |
| 9                                 | KOPiv                           | 40      | PivOH              | 1:1          | 12     | 12                    |
| 10                                | KOPiv                           | 40      | 4ÅMS               | 1:1          | 12     | 22                    |
| 11                                | KOPiv                           | 40      | Amberlite IRA-400  | 1:1          | 12     | 15                    |
| 12                                | KOPiv                           | 40      | Amberlite IR-120   | 1:1          | 12     | trace                 |
| 13                                | KOPiv                           | 40      | AgSbF <sub>6</sub> | 1:1          | 12     | ND                    |
| <i>other parameters screening</i> |                                 |         |                    |              |        |                       |
| 14                                | KOPiv                           | 40      | /                  | 1.5:1        | 12     | 31                    |
| 15                                | KOPiv                           | 40      | /                  | 2:1          | 12     | 51                    |
| 16                                | KOPiv                           | 40      | /                  | 2:1          | 6      | 33                    |
| 17                                | KOPiv                           | 40      | /                  | 2:1          | 8      | 36                    |
| 18                                | KOPiv                           | 40      | /                  | 2:1          | 24     | 21                    |
| 19                                | KOPiv                           | rt      | /                  | 2:1          | 12     | 46                    |
| 20                                | KOPiv                           | 60      | /                  | 2:1          | 12     | 15                    |
| 21                                | KOPiv                           | 80      | /                  | 2:1          | 12     | <10                   |

<sup>a</sup>Reaction Conditions: **1a**, **2a** (0.1 mmol), [Cp\*RhCl<sub>2</sub>]<sub>2</sub> (2.5 mol %), base (1.0 equiv), solvent (0.5 mL), temperature, time, under air. <sup>b</sup>Isolated yields. ND: not detected.

**General procedure for the carboamination of *N*-phenoxy amides with sulfonyl allenes:**

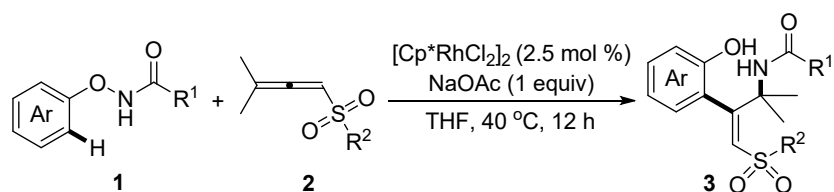

The mixture of *N*-phenoxy amide **1** (0.2 mmol, 1.0 equiv), sulfonyl allene **2** (0.2 mmol, 1.0 equiv),  $[\text{Cp}^*\text{RhCl}_2]_2$  (2.5 mol %) and NaOAc (0.2 mmol, 1.0 equiv) in THF (2.0 mL) was stirred at 40 °C for 12 h without exclusion of air or moisture. Afterwards, the solvent was removed under reduced pressure, and the resulted mixture was purified by preparative TLC to afford the corresponding allylamine derivatives **3**.

**Characterization of products:**

**(*Z*)-*N*-(3-(2-hydroxyphenyl)-2-methyl-4-tosylbut-3-en-2-yl)acetamide (**3aa**)**

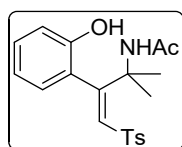

This compound was obtained in 74% yield (55.2 mg) as light yellow solid, m.p.: 186-187 °C. Eluent: PE/EA = 2/1,  $R_f$  = 0.7.

**<sup>1</sup>H NMR (400 MHz, CDCl<sub>3</sub>):**  $\delta$  9.84 (s, 1H), 7.78 (d,  $J$  = 8.1 Hz, 2H), 7.32 (d,  $J$  = 8.0 Hz, 2H), 7.18 (t,  $J$  = 7.6 Hz, 1H), 7.02 (brs, 1H), 6.91 (d,  $J$  = 8.2 Hz, 1H), 6.78-6.71 (m, 2H), 6.09 (s, 1H), 2.41 (s, 3H), 2.14 (s, 3H), 1.82 (s, 3H), 1.35 (s, 3H).

**<sup>13</sup>C NMR (100 MHz, CDCl<sub>3</sub>):**  $\delta$  171.6, 157.4, 154.3, 144.7, 138.8, 130.2, 130.1, 130.0, 127.8, 127.3, 126.1, 118.7, 117.2, 55.3, 28.0, 26.2, 24.2, 21.7.

**HRMS (ESI)** calculated for C<sub>20</sub>H<sub>24</sub>NO<sub>4</sub>S ( $[\text{M}+\text{H}]^+$ ): 374.1421; found: 374.1417.

**Scale-up synthesis of **3aa**:** The mixture of *N*-phenoxyacetamide **1a** (2.0 mmol, 1.0 equiv), sulfonyl allene **2a** (2.0 mmol, 1.0 equiv),  $[\text{Cp}^*\text{RhCl}_2]_2$  (2.5 mol %) and NaOAc (2.0 mmol, 1.0 equiv) in THF (10.0 mL) was stirred at 40 °C for 12 h without exclusion of air or moisture. Afterwards, the resulted mixture was purified by silica

gel column chromatography to afford the corresponding allylamine derivatives **3aa** in 73% (0.544 g) isolated yield.

**(Z)-N-(3-(2-hydroxy-5-methylphenyl)-2-methyl-4-tosylbut-3-en-2-yl)acetamide (3ba)**

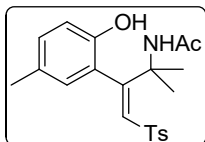

This compound was obtained in 75% yield (58.0 mg) as light yellow solid, m.p.: 185-187 °C. Eluent: PE/EA = 2/1,  $R_f$  = 0.8.

**$^1\text{H}$  NMR (400 MHz,  $\text{CDCl}_3$ ):**  $\delta$  9.56 (s, 1H), 7.78 (d,  $J$  = 8.1 Hz, 2H), 7.33 (d,  $J$  = 8.0 Hz, 2H), 6.98 (d,  $J$  = 8.3 Hz, 1H), 6.87-6.78 (m, 2H), 6.55 (s, 1H), 6.08 (s, 1H), 2.42 (s, 3H), 2.19 (s, 3H), 2.13 (s, 3H), 1.81 (s, 4H), 1.36 (s, 3H).

**$^{13}\text{C}$  NMR (100 MHz,  $\text{CDCl}_3$ ):**  $\delta$  171.6, 157.6, 152.0, 144.7, 138.9, 130.7, 130.2, 130.0, 128.0, 127.9, 127.4, 125.8, 117.1, 55.3, 28.1, 26.3, 24.3, 21.7, 20.4.

**HRMS (ESI)** calculated for  $\text{C}_{21}\text{H}_{26}\text{NO}_4\text{S}$  ( $[\text{M}+\text{H}]^+$ ): 388.1577; found: 388.1571.

**(Z)-N-(3-(5-(tert-butyl)-2-hydroxyphenyl)-2-methyl-4-tosylbut-3-en-2-yl)acetamide (3ca)**

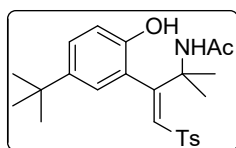

This compound was obtained in 65% yield (57.0 mg) as light yellow oil. Eluent: PE/EA = 2/1,  $R_f$  = 0.8.

**$^1\text{H}$  NMR (400 MHz,  $\text{CDCl}_3$ ):**  $\delta$  9.50 (s, 1H), 7.80 (d,  $J$  = 7.9 Hz, 2H), 7.33 (d,  $J$  = 8.0 Hz, 2H), 7.21 (d,  $J$  = 8.6 Hz, 1H), 6.86-6.83 (m, 2H), 6.72 (s, 1H), 6.14 (s, 1H), 2.42 (s, 3H), 2.12 (s, 3H), 1.82 (s, 3H), 1.32 (s, 3H), 1.24 (s, 9H).

**$^{13}\text{C}$  NMR (100 MHz,  $\text{CDCl}_3$ ):**  $\delta$  171.6, 157.9, 151.8, 144.7, 141.6, 138.9, 130.1, 130.0, 127.4, 127.0, 125.4, 124.1, 116.8, 55.4, 34.0, 31.6, 28.3, 26.5, 24.3, 21.7.

**HRMS (ESI)** calculated for  $\text{C}_{24}\text{H}_{32}\text{NO}_4\text{S}$  ( $[\text{M}+\text{H}]^+$ ): 392.1327; found: 392.1321.

**(Z)-N-(3-(5-fluoro-2-hydroxyphenyl)-2-methyl-4-tosylbut-3-en-2-yl)acetamide**

**(3da)**

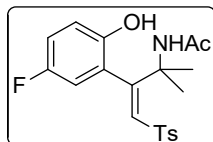

This compound was obtained in 81% yield (63.3 mg) as light yellow solid, m.p.: 136-138 °C. Eluent: PE/EA = 2/1,  $R_f$  = 0.8.

**$^1\text{H}$  NMR (400 MHz,  $\text{CDCl}_3$ ):**  $\delta$  9.72 (s, 1H), 7.78 (d,  $J$  = 8.2 Hz, 2H), 7.34 (d,  $J$  = 8.0 Hz, 2H), 6.92-6.81 (m, 3H), 6.51 (dd,  $J$  = 8.3, 2.8 Hz, 1H), 6.09 (s, 1H), 2.43 (s, 3H), 2.14 (s, 3H), 1.81 (s, 3H), 1.36 (s, 3H).

**$^{13}\text{C}$  NMR (100 MHz,  $\text{CDCl}_3$ ):**  $\delta$  171.7, 156.0, 155.5 (d,  $J$  = 238.1 Hz), 150.5, 145.0, 138.6, 130.9, 130.1, 126.2 (d,  $J$  = 7.3 Hz), 118.3 (d,  $J$  = 8.0 Hz), 116.6 (d,  $J$  = 22.5 Hz), 114.1 (d,  $J$  = 23.6 Hz), 55.1, 28.1, 26.3, 24.2, 21.7.

**$^{19}\text{F}$  NMR (376 MHz,  $\text{CDCl}_3$ ):**  $\delta$  -126.13.

**HRMS (ESI)** calculated for  $\text{C}_{20}\text{H}_{23}\text{FNO}_4\text{S}$  ( $[\text{M}+\text{H}]^+$ ): 392.1327; found: 392.1322.

**(Z)-N-(3-(5-chloro-2-hydroxyphenyl)-2-methyl-4-tosylbut-3-en-2-yl)acetamide**

**(3ea)**

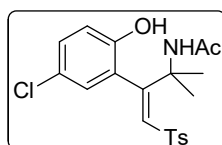

This compound was obtained in 78% yield (65.1 mg) as light yellow solid, m.p.: 187-188 °C. Eluent: PE/EA = 2/1,  $R_f$  = 0.8.

**$^1\text{H}$  NMR (400 MHz,  $\text{CDCl}_3$ ):**  $\delta$  10.02 (s, 1H), 7.78 (d,  $J$  = 8.1 Hz, 2H), 7.35 (d,  $J$  = 8.0 Hz, 2H), 7.13 (dd,  $J$  = 8.7, 2.3 Hz, 1H), 6.91 (brs, 1H), 6.84 (d,  $J$  = 8.8 Hz, 1H), 6.74 (d,  $J$  = 2.3 Hz, 1H), 6.08 (s, 1H), 2.43 (s, 3H), 2.15 (s, 3H), 1.81 (s, 3H), 1.36 (s, 3H).

**$^{13}\text{C}$  NMR (100 MHz,  $\text{CDCl}_3$ ):**  $\delta$  171.8, 155.8, 153.3, 145.0, 138.5, 131.0, 130.2, 130.0, 127.4, 127.3, 127.2, 123.3, 118.8, 55.2, 28.0, 26.2, 24.2, 21.7.

**HRMS (ESI)** calculated for C<sub>20</sub>H<sub>23</sub>ClNO<sub>4</sub>S ([M+H]<sup>+</sup>): 408.1031; found: 408.1026.

**(Z)-N-(3-(5-bromo-2-hydroxyphenyl)-2-methyl-4-tosylbut-3-en-2-yl)acetamide (3fa)**

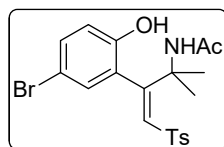

This compound was obtained in 80% yield (71.6 mg) as light yellow solid, m.p.: 168-170 °C. Eluent: PE/EA = 2/1, R<sub>f</sub> = 0.8.

**<sup>1</sup>H NMR (400 MHz, CDCl<sub>3</sub>):** δ 10.07 (s, 1H), 7.78 (d, *J* = 8.2 Hz, 2H), 7.35 (d, *J* = 8.1 Hz, 2H), 7.27 (dd, *J* = 8.6, 2.4 Hz, 1H), 6.93 (brs, 1H), 6.88 (d, *J* = 2.3 Hz, 1H), 6.80 (d, *J* = 8.7 Hz, 1H), 6.08 (s, 1H), 2.43 (s, 3H), 2.15 (s, 3H), 1.81 (s, 3H), 1.36 (s, 3H).

**<sup>13</sup>C NMR (100 MHz, CDCl<sub>3</sub>):** δ 171.8, 155.7, 153.8, 145.0, 138.5, 132.9, 131.0, 130.2, 130.0, 127.8, 127.4, 119.3, 110.4, 55.2, 28.0, 26.2, 24.2, 21.7.

**HRMS (ESI)** calculated for C<sub>20</sub>H<sub>23</sub>BrNO<sub>4</sub>S ([M+H]<sup>+</sup>): 452.0526; found: 452.0522.

**(Z)-N-(3-(2-hydroxy-5-iodophenyl)-2-methyl-4-tosylbut-3-en-2-yl)acetamide (3ga)**

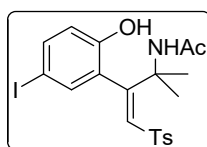

This compound was obtained in 72% yield (72.0 mg) as light yellow solid, m.p.: 182-183 °C. Eluent: PE/EA = 2/1, R<sub>f</sub> = 0.7.

**<sup>1</sup>H NMR (400 MHz, CDCl<sub>3</sub>):** δ 10.10 (s, 1H), 7.78 (d, *J* = 8.0 Hz, 2H), 7.44 (d, *J* = 8.6 Hz, 1H), 7.35 (d, *J* = 8.0 Hz, 2H), 7.04 (s, 1H), 6.90 (brs, 1H), 6.69 (d, *J* = 8.6 Hz, 1H), 6.07 (s, 1H), 2.43 (s, 3H), 2.14 (s, 3H), 1.80 (s, 3H), 1.36 (s, 3H).

**<sup>13</sup>C NMR (100 MHz, CDCl<sub>3</sub>):** δ 171.8, 155.6, 154.6, 145.0, 138.9, 138.5, 135.7, 131.0, 130.2, 128.6, 127.4, 119.8, 79.9, 55.2, 28.0, 26.2, 24.2, 21.7.

**HRMS (ESI)** calculated for C<sub>20</sub>H<sub>23</sub>INO<sub>4</sub>S ([M+H]<sup>+</sup>): 500.0387; found: 500.0383.



**(Z)-N-(3-(2-hydroxy-5-(trifluoromethyl)phenyl)-2-methyl-4-tosylbut-3-en-2-yl)acetamide (3ha)**

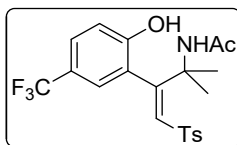

This compound was obtained in 86% yield (75.6 mg) as light yellow solid, m.p.: 179-181 °C. Eluent: PE/EA = 2/1,  $R_f$  = 0.8.

**$^1\text{H}$  NMR (400 MHz,  $\text{CDCl}_3$ ):**  $\delta$  10.55 (s, 1H), 7.80 (d,  $J$  = 8.2 Hz, 2H), 7.44 (d,  $J$  = 8.6 Hz, 1H), 7.35 (d,  $J$  = 8.1 Hz, 2H), 7.01 (s, 1H), 6.98 (d,  $J$  = 8.6 Hz, 1H), 6.92 (s, 1H), 6.10 (s, 1H), 2.43 (s, 3H), 2.17 (s, 3H), 1.84 (s, 3H), 1.35 (s, 3H).

**$^{13}\text{C}$  NMR (100 MHz,  $\text{CDCl}_3$ ):**  $\delta$  172.0, 157.6, 155.7, 145.1, 138.4, 131.4, 130.2, 127.5, 126.1, 125.1 (q,  $J$  = 3.6 Hz), 124.4 (q,  $J$  = 270.9 Hz), 121.1 (q,  $J$  = 32.9 Hz), 117.8, 55.2, 28.1, 26.3, 24.3, 21.7.

**$^{19}\text{F}$  NMR (376 MHz,  $\text{CDCl}_3$ ):**  $\delta$  -61.02.

**HRMS (ESI)** calculated for  $\text{C}_{21}\text{H}_{23}\text{F}_3\text{NO}_4\text{S}$  ( $[\text{M}+\text{H}]^+$ ): 442.1295; found: 442.1288.

**(Z)-N-(3-(2-hydroxy-5-nitrophenyl)-2-methyl-4-tosylbut-3-en-2-yl)acetamide (3ia)**

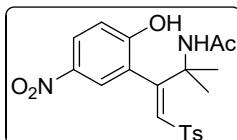

This compound was obtained in 90% yield (75.2 mg) as light yellow oil. Eluent: PE/EA = 2/1,  $R_f$  = 0.7.

**$^1\text{H}$  NMR (400 MHz,  $\text{CDCl}_3$ ):**  $\delta$  11.37 (s, 1H), 8.10 (d,  $J$  = 9.1 Hz, 1H), 7.80 (d,  $J$  = 8.1 Hz, 2H), 7.74 (s, 1H), 7.37 (d,  $J$  = 8.0 Hz, 2H), 7.12 (s, 1H), 6.97 (d,  $J$  = 9.1 Hz, 1H), 6.12 (s, 1H), 2.44 (s, 3H), 2.20 (s, 3H), 1.87 (s, 3H), 1.37 (s, 3H).

**$^{13}\text{C}$  NMR (100 MHz,  $\text{CDCl}_3$ ):**  $\delta$  172.2, 161.0, 154.4, 145.3, 139.7, 138.1, 132.0, 130.3, 127.5, 126.5, 126.1, 124.4, 117.9, 55.1, 27.9, 26.1, 24.1, 21.7.

**HRMS (ESI)** calculated for  $\text{C}_{20}\text{H}_{23}\text{N}_2\text{O}_6\text{S}$  ( $[\text{M}+\text{H}]^+$ ): 419.1272; found: 419.1267.

**(Z)-N-(3-(5-cyano-2-hydroxyphenyl)-2-methyl-4-tosylbut-3-en-2-yl)acetamide**

**(3ja)**

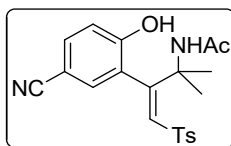

This compound was obtained in 57% yield (45.3 mg) as light yellow solid, m.p.: 192-193 °C. Eluent: PE/EA = 2/1,  $R_f$  = 0.7.

**$^1\text{H}$  NMR (400 MHz,  $\text{CDCl}_3$ ):**  $\delta$  10.97 (s, 1H), 7.79 (d,  $J$  = 8.1 Hz, 2H), 7.48 (d,  $J$  = 8.5 Hz, 1H), 7.37 (d,  $J$  = 8.0 Hz, 2H), 7.08 (s, 1H), 6.96 (d,  $J$  = 8.6 Hz, 1H), 6.91 (brs, 1H), 6.06 (s, 1H), 2.44 (s, 3H), 2.17 (s, 3H), 1.82 (s, 3H), 1.35 (s, 3H).

**$^{13}\text{C}$  NMR (100 MHz,  $\text{CDCl}_3$ ):**  $\delta$  172.1, 158.9, 154.7, 145.3, 138.3, 134.3, 132.3, 131.8, 130.3, 127.5, 127.1, 119.1, 118.6, 102.1, 55.2, 28.0, 26.2, 24.2, 21.8.

**HRMS (ESI)** calculated for  $\text{C}_{21}\text{H}_{23}\text{N}_2\text{O}_4\text{S}$  ( $[\text{M}+\text{H}]^+$ ): 399.1373; found: 399.1369.

**methyl (Z)-3-(3-acetamido-3-methyl-1-tosylbut-1-en-2-yl)-4-hydroxybenzoate (3ka)**

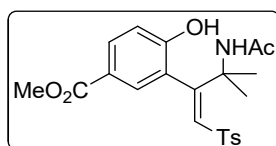

This compound was obtained in 58% yield (50.0 mg) as light yellow solid, m.p.: 191-192 °C. Eluent: PE/EA = 3/1,  $R_f$  = 0.4.

**$^1\text{H}$  NMR (400 MHz,  $\text{CDCl}_3$ ):**  $\delta$  10.65 (s, 1H), 7.87 (d,  $J$  = 8.6 Hz, 1H), 7.79 (d,  $J$  = 8.2 Hz, 2H), 7.49 (s, 1H), 7.34 (d,  $J$  = 8.1 Hz, 2H), 6.94-6.91 (m, 2H), 6.08 (s, 1H), 3.85 (s, 3H), 2.43 (s, 3H), 2.17 (s, 3H), 1.84 (s, 3H), 1.35 (s, 3H).

**$^{13}\text{C}$  NMR (100 MHz,  $\text{CDCl}_3$ ):**  $\delta$  171.9, 166.7, 159.1, 156.0, 145.0, 138.5, 132.1, 131.2, 130.2, 130.0, 127.5, 126.0, 120.8, 117.3, 55.3, 52.0, 28.0, 26.2, 24.2, 21.7.

**HRMS (ESI)** calculated for  $\text{C}_{22}\text{H}_{26}\text{NO}_6\text{S}$  ( $[\text{M}+\text{H}]^+$ ): 432.1476; found: 432.1475.

**(Z)-N-(3-(4-hydroxy-[1,1'-biphenyl]-3-yl)-2-methyl-4-tosylbut-3-en-2-yl)acetamide (3la)**

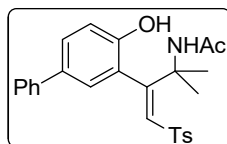

This compound was obtained in 72% yield (64.9 mg) as light yellow solid, m.p.: 175-177 °C. Eluent: PE/EA = 2/1,  $R_f$  = 0.8.

**$^1\text{H}$  NMR (400 MHz,  $\text{CDCl}_3$ ):**  $\delta$  9.96 (s, 1H), 7.79 (d,  $J$  = 8.2 Hz, 2H), 7.50-7.41 (m, 3H), 7.38 (t,  $J$  = 7.6 Hz, 2H), 7.32 (d,  $J$  = 8.1 Hz, 2H), 7.33-7.25 (m, 1H), 7.01-6.96 (m, 2H), 6.93 (s, 1H), 6.17 (s, 1H), 2.41 (s, 3H), 2.16 (s, 3H), 1.86 (s, 3H), 1.41 (s, 3H).

**$^{13}\text{C}$  NMR (100 MHz,  $\text{CDCl}_3$ ):**  $\delta$  171.8, 157.2, 154.1, 144.8, 140.4, 138.7, 132.0, 130.6, 130.1, 128.9, 127.4, 126.9, 126.7, 126.4, 126.3, 117.8, 55.4, 28.2, 26.4, 24.3, 21.7.

**HRMS (ESI)** calculated for  $\text{C}_{26}\text{H}_{28}\text{NO}_4\text{S}$  ( $[\text{M}+\text{H}]^+$ ): 450.1734; found: 450.1729.

**(Z)-N-(3-(2-hydroxy-3-methylphenyl)-2-methyl-4-tosylbut-3-en-2-yl)acetamide (3ma)**

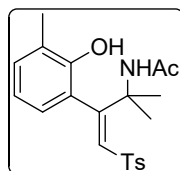

This compound was obtained in 64% yield (49.8 mg) as light yellow solid, m.p.: 205-207 °C. Eluent: PE/EA = 2/1,  $R_f$  = 0.8.

**$^1\text{H}$  NMR (400 MHz,  $\text{CDCl}_3$ ):**  $\delta$  9.81 (s, 1H), 7.77 (d,  $J$  = 8.2 Hz, 2H), 7.31 (d,  $J$  = 8.0 Hz, 2H), 7.04 (d,  $J$  = 6.6 Hz, 1H), 6.93 (brs, 1H), 6.66-6.57 (m, 2H), 6.09 (s, 1H), 2.41 (s, 3H), 2.23 (s, 3H), 2.14 (s, 3H), 1.82 (s, 3H), 1.34 (s, 3H).

**$^{13}\text{C}$  NMR (100 MHz,  $\text{CDCl}_3$ ):**  $\delta$  171.7, 157.7, 152.3, 144.7, 138.9, 131.0, 130.2, 130.0, 127.3, 126.4, 125.6, 125.3, 118.3, 55.3, 28.1, 26.3, 24.2, 21.7, 16.4.

**HRMS (ESI)** calculated for  $\text{C}_{21}\text{H}_{26}\text{NO}_4\text{S}$  ( $[\text{M}+\text{H}]^+$ ): 388.1577; found: 388.1572.

**(Z)-N-(3-(2-hydroxy-4-methoxyphenyl)-2-methyl-4-tosylbut-3-en-2-yl)acetamide (3na) & (Z)-N-(3-(2-hydroxy-6-methoxyphenyl)-2-methyl-4-tosylbut-3-en-2-yl)**

### acetamide (**3na'**)

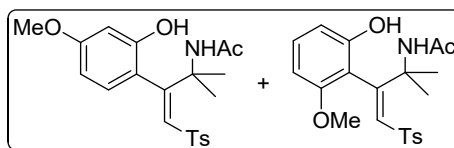

This compound was obtained in 54% yield (43.4 mg) as light yellow oil. Eluent: PE/EA = 2/1,  $R_f$  = 0.7. An inseparable mixture of two regio isomers was obtained, and the ratio was determined to be **3na/3na'** = 5/1 by  $^1\text{H-NMR}$  analysis.

$^1\text{H NMR}$  (400 MHz,  $\text{CDCl}_3$ ):  $\delta$  9.89 (s, 0.83H), 9.84 (s, 0.17H), 7.77 (d,  $J$  = 8.0 Hz, 2H), 7.32 (d,  $J$  = 7.8 Hz, 2H), 7.09 (t,  $J$  = 8.2 Hz, 0.17H), 7.02 (brs, 0.83H), 6.93 (brs, 0.17H), 6.65 (d,  $J$  = 8.4 Hz, 0.83H), 6.59-6.53 (m, 0.17H), 6.47 (s, 0.83H), 6.33-6.29 (m, 1H), 6.08 (s, 6H), 3.74 (s, 2.49H), 3.71 (s, 0.51H), 2.41 (s, 3H), 2.13 (s, 2.49H), 2.12 (s, 0.51H), 1.91 (s, 0.51H), 1.79 (s, 2.49H), 1.35 (s, 3H).

$^{13}\text{C NMR}$  (100 MHz,  $\text{CDCl}_3$ ):  $\delta$  171.7, 171.5, 161.3, 157.5, 156.6, 155.7, 155.6, 153.4, 144.7, 144.5, 138.9, 138.8, 131.0, 130.5, 130.0, 129.9, 129.8, 128.5, 127.3, 127.2, 118.9, 115.9, 110.5, 105.5, 101.9, 101.3, 55.5, 55.3, 28.3, 28.0, 26.7, 26.2, 24.20, 24.15, 21.6.

HRMS (ESI) calculated for  $\text{C}_{21}\text{H}_{26}\text{NO}_5\text{S}$  ( $[\text{M}+\text{H}]^+$ ): 404.1526; found: 404.1521.

### (*Z*)-*N*-(3-(2-hydroxy-4-methylphenyl)-2-methyl-4-tosylbut-3-en-2-yl)acetamide (**3oa**)

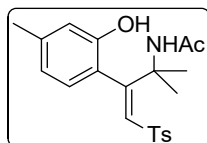

This compound was obtained in 62% yield (47.3 mg) as light yellow oil. Eluent: PE/EA = 2/1,  $R_f$  = 0.8.

$^1\text{H NMR}$  (400 MHz,  $\text{CDCl}_3$ ):  $\delta$  9.68 (s, 1H), 7.77 (d,  $J$  = 8.2 Hz, 2H), 7.32 (d,  $J$  = 8.1 Hz, 2H), 6.88 (brs, 1H), 6.74 (s, 1H), 6.65 (d,  $J$  = 7.6 Hz, 1H), 6.55 (d,  $J$  = 7.6 Hz, 1H), 6.07 (s, 1H), 2.41 (s, 3H), 2.25 (s, 3H), 2.13 (s, 3H), 1.80 (s, 3H), 1.36 (s, 3H).

$^{13}\text{C NMR}$  (100 MHz,  $\text{CDCl}_3$ ):  $\delta$  171.6, 157.6, 154.2, 144.7, 140.4, 138.9, 130.3, 130.0, 127.6, 127.3, 123.4, 119.6, 117.8, 55.4, 28.1, 26.3, 24.2, 21.7, 21.3.

HRMS (ESI) calculated for C<sub>21</sub>H<sub>26</sub>NO<sub>4</sub>S ([M+H]<sup>+</sup>): 388.1577; found: 388.1573.

**(Z)-N-(3-(4-chloro-2-hydroxyphenyl)-2-methyl-4-tosylbut-3-en-2-yl)acetamide**

**(3pa)**

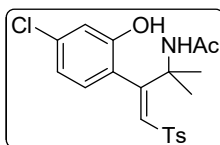

This compound was obtained in 82% yield (66.8 mg) as light yellow solid, m.p.: 174-176 °C. Eluent: PE/EA = 2/1, R<sub>f</sub> = 0.8.

<sup>1</sup>H NMR (400 MHz, CDCl<sub>3</sub>): δ 10.17 (s, 1H), 7.77 (d, *J* = 8.2 Hz, 2H), 7.34 (d, *J* = 8.1 Hz, 2H), 6.93-6.91 (m, 2H), 6.73-6.66 (m, 2H), 6.07 (s, 1H), 2.42 (s, 3H), 2.14 (s, 3H), 1.80 (s, 3H), 1.34 (s, 3H).

<sup>13</sup>C NMR (100 MHz, CDCl<sub>3</sub>): δ 171.8, 156.3, 155.4, 144.9, 138.6, 135.4, 130.9, 130.1, 128.7, 127.4, 124.7, 119.0, 117.6, 55.2, 28.1, 26.3, 24.2, 21.7.

HRMS (ESI) calculated for C<sub>20</sub>H<sub>23</sub>ClNO<sub>4</sub>S ([M+H]<sup>+</sup>): 408.1031; found: 408.1027.

**(Z)-N-(3-(2-fluoro-6-hydroxyphenyl)-2-methyl-4-tosylbut-3-en-2-yl)acetamide**

**(3qa)**

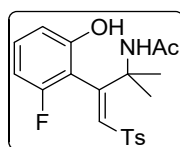

This compound was obtained in 66% yield (51.6 mg) as light yellow solid, m.p.: 130-132 °C. Eluent: PE/EA = 2/1, R<sub>f</sub> = 0.8.

<sup>1</sup>H NMR (400 MHz, CDCl<sub>3</sub>): δ 10.12 (s, 1H), 7.79 (d, *J* = 8.2 Hz, 2H), 7.34 (d, *J* = 8.0 Hz, 2H), 7.11 (dd, *J* = 15.2, 8.1 Hz, 1H), 6.94 (brs, 1H), 6.71 (d, *J* = 8.3 Hz, 1H), 6.49 (t, *J* = 8.7 Hz, 1H), 6.13 (s, 1H), 2.42 (s, 3H), 2.16 (s, 3H), 1.88 (s, 3H), 1.39 (s, 3H).

<sup>13</sup>C NMR (100 MHz, CDCl<sub>3</sub>): δ 171.7, 158.9 (d, *J* = 242.8 Hz), 156.3 (d, *J* = 4.7 Hz), 150.5, 144.9, 138.6, 132.3, 130.2, 130.1, 127.4, 114.8 (d, *J* = 19.7 Hz), 113.1 (d, *J* = 1.9 Hz), 105.6 (d, *J* = 22.3 Hz), 55.3, 27.7, 26.7, 24.3, 21.7.

**<sup>19</sup>F NMR (376 MHz, CDCl<sub>3</sub>):** δ -113.82.

**HRMS (ESI)** calculated for C<sub>20</sub>H<sub>23</sub>FNO<sub>4</sub>S ([M+H]<sup>+</sup>): 392.1327; found: 392.1321.

**(Z)-N-(3-(3-hydroxynaphthalen-2-yl)-2-methyl-4-tosylbut-3-en-2-yl)acetamide (3ra)**

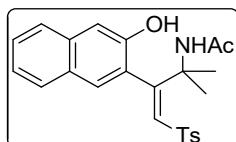

This compound was obtained in 47% yield (39.7 mg) as light yellow oil. Eluent: PE/EA = 2/1, R<sub>f</sub> = 0.7.

**<sup>1</sup>H NMR (400 MHz, CDCl<sub>3</sub>):** δ 9.98 (s, 1H), 7.80 (d, *J* = 8.2 Hz, 2H), 7.64 (t, *J* = 7.3 Hz, 2H), 7.37 (t, *J* = 7.6 Hz, 1H), 7.33 (d, *J* = 8.1 Hz, 2H), 7.29-7.22 (m, 3H), 6.89 (brs, 1H), 6.18 (s, 1H), 2.41 (s, 3H), 2.17 (s, 3H), 1.88 (s, 3H), 1.38 (s, 3H).

**<sup>13</sup>C NMR (100 MHz, CDCl<sub>3</sub>):** δ 171.9, 157.0, 152.3, 144.9, 138.7, 135.2, 130.8, 130.1, 129.1, 127.4, 127.3, 127.1, 126.8, 126.5, 123.6, 111.5, 55.5, 28.2, 26.2, 24.3, 21.7.

**HRMS (ESI)** calculated for C<sub>24</sub>H<sub>26</sub>NO<sub>4</sub>S ([M+H]<sup>+</sup>): 424.1577; found: 424.1571.

**(Z)-N-(3-(2-hydroxyphenyl)-2-methyl-4-tosylbut-3-en-2-yl)propionamide (3sa)**

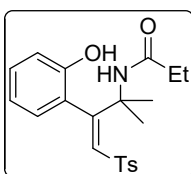

This compound was obtained in 78% yield (60.4 mg) as light yellow oil. Eluent: PE/EA = 3/1, R<sub>f</sub> = 0.7.

**<sup>1</sup>H NMR (400 MHz, CDCl<sub>3</sub>):** δ 9.96 (s, 1H), 7.77 (d, *J* = 8.2 Hz, 2H), 7.32 (d, *J* = 8.0 Hz, 2H), 7.18 (t, *J* = 7.5 Hz, 1H), 6.91 (d, *J* = 8.2 Hz, 1H), 6.81 (brs, 1H), 6.78-6.70 (m, 2H), 6.08 (s, 1H), 2.50-2.31 (m, 5H), 1.82 (s, 3H), 1.35 (s, 3H), 1.22 (t, *J* = 7.5 Hz, 3H).

**<sup>13</sup>C NMR (100 MHz, CDCl<sub>3</sub>):** δ 174.8, 157.5, 154.4, 144.7, 138.8, 130.3, 130.1, 130.0, 127.8, 127.3, 126.2, 118.7, 117.3, 55.1, 30.1, 28.2, 26.3, 21.7, 9.0.

**HRMS (ESI)** calculated for  $C_{21}H_{26}NO_4S$  ( $[M+H]^+$ ): 388.1577; found: 388.1572.

**(Z)-N-(3-(2-hydroxyphenyl)-2-methyl-4-tosylbut-3-en-2-yl)-2-phenylacetamide**

**(3ta)**

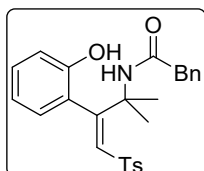

This compound was obtained in 65% yield (54.7 mg) as white solid. Eluent: PE/EA = 3/1.  $R_f = 0.7$ .

**$^1H$  NMR (400 MHz,  $CDCl_3$ ):**  $\delta$  9.82 (s, 1H), 7.79 (d,  $J = 7.9$  Hz, 2H), 7.42-7.28 (m, 7H), 7.19-7.16 (m, 1H), 6.91 (d,  $J = 8.1$  Hz, 1H), 6.75-6.70 (m, 2H), 6.65 (s, 1H), 6.10 (s, 1H), 3.85-3.71 (m, 2H), 2.42 (s, 3H), 1.70 (s, 3H), 1.30 (s, 3H).

**$^{13}C$  NMR (100 MHz,  $CDCl_3$ ):**  $\delta$  172.3, 156.8, 154.3, 144.8, 138.8, 134.5, 130.5, 130.1, 130.0, 129.0, 127.8, 127.5, 127.4, 126.0, 118.7, 117.3, 55.4, 44.2, 27.7, 26.3, 21.7.

**HRMS (ESI)** calculated for  $C_{26}H_{28}NO_4S$  ( $[M+H]^+$ ):450.1734; found:450.1727.

**(Z)-N-(3-(2-hydroxyphenyl)-2-methyl-4-(phenylsulfonyl)but-3-en-2-yl)acetamide**

**(3ab)**

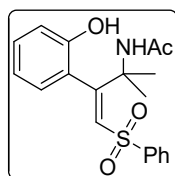

This compound was obtained in 65% yield (46.8 mg) as light yellow oil. Eluent: PE/EA = 3/1,  $R_f = 0.4$ .

**$^1H$  NMR (400 MHz,  $CDCl_3$ ):**  $\delta$  9.79 (s, 1H), 7.91 (d,  $J = 7.4$  Hz, 2H), 7.62 (t,  $J = 7.4$  Hz, 1H), 7.54 (t,  $J = 7.5$  Hz, 2H), 7.19 (t,  $J = 7.6$  Hz, 1H), 6.91 (d,  $J = 8.4$  Hz, 2H), 6.79-6.71 (m, 2H), 6.11 (s, 1H), 2.14 (s, 3H), 1.82 (s, 3H), 1.36 (s, 3H).

**$^{13}C$  NMR (100 MHz,  $CDCl_3$ ):**  $\delta$  171.7, 157.9, 154.3, 141.7, 133.8, 130.2, 130.0, 129.5, 127.8, 127.3, 126.0, 118.8, 117.4, 55.4, 28.0, 26.3, 24.3.

HRMS (ESI) calculated for C<sub>19</sub>H<sub>22</sub>NO<sub>4</sub>S ([M+H]<sup>+</sup>): 360.1264; found: 360.1260.

**(Z)-N-(3-(2-hydroxyphenyl)-4-((4-methoxyphenyl)sulfonyl)-2-methylbut-3-en-2-yl)acetamide (3ac)**

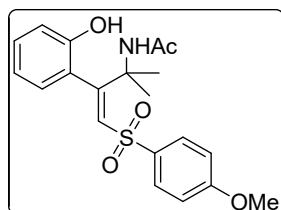

This compound was obtained in 70% yield (55.5 mg) as light yellow solid, m.p.: 120-122 °C. Eluent: PE/EA = 3/1, R<sub>f</sub> = 0.4.

**<sup>1</sup>H NMR (400 MHz, CDCl<sub>3</sub>):** δ 9.81 (s, 1H), 7.82 (d, *J* = 8.9 Hz, 2H), 7.18 (t, *J* = 7.5 Hz, 1H), 7.01-6.96 (m, 3H), 6.91 (d, *J* = 8.2 Hz, 1H), 6.78-6.69 (m, 2H), 6.09 (s, 1H), 3.85 (s, 3H), 2.15 (s, 3H), 1.81 (s, 3H), 1.35 (s, 3H).

**<sup>13</sup>C NMR (100 MHz, CDCl<sub>3</sub>):** δ 171.7, 163.7, 156.9, 154.3, 133.3, 130.6, 130.1, 129.5, 127.8, 126.1, 118.6, 117.3, 114.6, 55.8, 55.3, 28.0, 26.3, 24.2.

HRMS (ESI) calculated for C<sub>20</sub>H<sub>24</sub>NO<sub>5</sub>S ([M+H]<sup>+</sup>): 390.1370; found: 390.1361.

**(Z)-N-(4-((4-fluorophenyl)sulfonyl)-3-(2-hydroxyphenyl)-2-methylbut-3-en-2-yl)acetamide (3ad)**

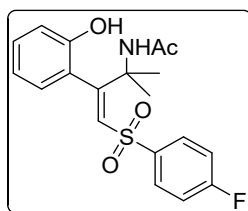

This compound was obtained in 54% yield (40.7 mg) as light yellow oil. Eluent: PE/EA = 3/1, R<sub>f</sub> = 0.5.

**<sup>1</sup>H NMR (400 MHz, CDCl<sub>3</sub>):** δ 9.75 (s, 1H), 7.97-7.88 (m, 2H), 7.25-7.17 (m, 3H), 6.92 (d, *J* = 8.3 Hz, 1H), 6.80 (brs, 1H), 6.78-6.74 (m, 2H), 6.09 (s, 1H), 2.15 (s, 3H), 1.81 (s, 3H), 1.36 (s, 3H).

**<sup>13</sup>C NMR (100 MHz, CDCl<sub>3</sub>):** δ 171.7, 165.8 (d, *J* = 256.4 Hz), 158.2, 154.3, 137.8 (d, *J* = 3.0 Hz), 130.33, 130.31, 130.24, 129.9, 127.7, 125.9, 118.9, 117.5, 116.8 (d, *J*



= 22.5 Hz), 55.4, 28.0, 26.3, 24.3.

<sup>19</sup>F NMR (376 MHz, CDCl<sub>3</sub>): δ -103.31.

HRMS (ESI) calculated for C<sub>19</sub>H<sub>21</sub>FNO<sub>4</sub>S ([M+H]<sup>+</sup>): 378.1170; found: 378.1167.

**(Z)-N-(4-((4-chlorophenyl)sulfonyl)-3-(2-hydroxyphenyl)-2-methylbut-3-en-2-yl)acetamide (3ae)**

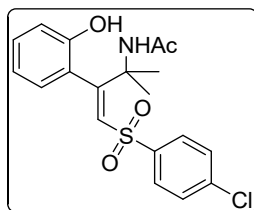

This compound was obtained in 77% yield (60.8 mg) as light yellow oil. Eluent: PE/EA = 3/1, R<sub>f</sub> = 0.6.

<sup>1</sup>H NMR (400 MHz, CDCl<sub>3</sub>): δ 9.76 (s, 1H), 7.84 (d, *J* = 8.6 Hz, 2H), 7.51 (d, *J* = 8.6 Hz, 2H), 7.22-7.17 (m, 1H), 6.92 (d, *J* = 8.3 Hz, 1H), 6.83 (s, 1H), 6.78-6.71 (m, 2H), 6.08 (s, 1H), 2.14 (s, 3H), 1.81 (s, 3H), 1.36 (s, 3H).

<sup>13</sup>C NMR (100 MHz, CDCl<sub>3</sub>): δ 171.7, 158.5, 154.3, 140.5, 140.2, 130.3, 129.8, 129.6, 128.9, 127.7, 125.9, 118.9, 117.4, 55.4, 28.0, 26.3, 24.3.

HRMS (ESI) calculated for C<sub>19</sub>H<sub>21</sub>ClNO<sub>4</sub>S ([M+H]<sup>+</sup>): 394.0875; found: 394.0873.

**(Z)-N-(3-(2-hydroxyphenyl)-2-methyl-4-((4-(trifluoromethyl)phenyl)sulfonyl)but-3-en-2-yl)acetamide (3af)**

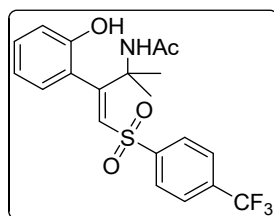

This compound was obtained in 49% yield (41.8 mg) as light yellow oil. Eluent: PE/EA = 3/1, R<sub>f</sub> = 0.6.

<sup>1</sup>H NMR (400 MHz, CDCl<sub>3</sub>): δ 9.74 (s, 1H), 8.05 (d, *J* = 8.2 Hz, 2H), 7.82 (d, *J* = 8.3 Hz, 2H), 7.24-7.16 (m, 1H), 6.92 (d, *J* = 8.3 Hz, 1H), 6.82 (s, 1H), 6.79-6.72 (m, 2H), 6.08 (s, 1H), 2.15 (s, 3H), 1.83 (s, 3H), 1.37 (s, 3H).

**<sup>13</sup>C NMR (100 MHz, CDCl<sub>3</sub>):** δ 171.7, 159.5, 154.2, 145.1, 135.5 (q, *J* = 33.4 Hz), 130.4, 129.0, 128.0, 127.6, 126.7 (q, *J* = 3.4 Hz), 125.7, 123.2 (q, *J* = 273.2 Hz), 118.9, 117.5, 55.5, 28.0, 26.3, 24.2.

**<sup>19</sup>F NMR (376 MHz, CDCl<sub>3</sub>):** δ -63.13.

**HRMS (ESI)** calculated for C<sub>20</sub>H<sub>21</sub>F<sub>3</sub>NO<sub>4</sub>S ([M+H]<sup>+</sup>): 428.1138; found: 428.1131.

**(Z)-N-(3-(2-hydroxyphenyl)-2-methyl-4-(m-tolylsulfonyl)but-3-en-2-yl)acetamide (3ag)**

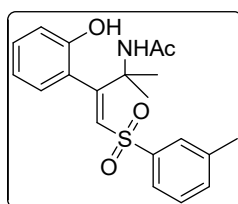

This compound was obtained in 64% yield (47.6 mg) as light yellow oil. Eluent: PE/EA = 3/1, R<sub>f</sub> = 0.5.

**<sup>1</sup>H NMR (400 MHz, CDCl<sub>3</sub>):** δ 9.79 (s, 1H), 7.72-7.69 (m, 2H), 7.43-7.38 (m, 2H), 7.19 (t, *J* = 8.3 Hz, 1H), 6.93-6.88 (m, 2H), 6.82-6.71 (m, 2H), 6.11 (s, 1H), 2.42 (s, 3H), 2.15 (s, 3H), 1.82 (s, 3H), 1.36 (s, 3H).

**<sup>13</sup>C NMR (100 MHz, CDCl<sub>3</sub>):** δ 171.7, 157.6, 154.4, 141.5, 139.8, 134.5, 130.2, 129.3, 127.8, 127.6, 126.1, 124.4, 118.8, 117.4, 55.3, 28.0, 26.3, 24.3, 21.4.

**HRMS (ESI)** calculated for C<sub>20</sub>H<sub>24</sub>NO<sub>4</sub>S ([M+H]<sup>+</sup>): 374.1421; found: 374.1416.

**(Z)-N-(3-(2-hydroxyphenyl)-2-methyl-4-(o-tolylsulfonyl)but-3-en-2-yl)acetamide (3ah)**

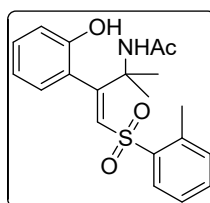

This compound was obtained in 67% yield (49.8 mg) as light yellow solid, m.p.: 168-169 °C. Eluent: PE/EA = 3/1, R<sub>f</sub> = 0.4.

**<sup>1</sup>H NMR (400 MHz, CDCl<sub>3</sub>):** δ 9.78 (s, 1H), 8.00 (d, *J* = 7.9 Hz, 1H), 7.48 (t, *J* = 7.4

Hz, 1H), 7.38-7.27 (m, 2H), 7.19 (t,  $J = 7.7$  Hz, 1H), 6.92 (d,  $J = 8.2$  Hz, 1H), 6.88 (brs, 1H), 6.82-6.75 (m, 2H), 6.11 (s, 1H), 2.68 (s, 3H), 2.15 (s, 3H), 1.84 (s, 3H), 1.37 (s, 3H).

$^{13}\text{C}$  NMR (100 MHz,  $\text{CDCl}_3$ ):  $\delta$  171.8, 158.4, 154.4, 139.8, 137.5, 133.8, 132.6, 130.2, 129.9, 128.4, 127.4, 126.7, 126.1, 118.8, 117.4, 55.4, 27.3, 26.3, 24.3, 20.6.

HRMS (ESI) calculated for  $\text{C}_{20}\text{H}_{24}\text{NO}_4\text{S}$  ( $[\text{M}+\text{H}]^+$ ): 374.1421; found: 374.1418.

**(Z)-N-(3-(2-hydroxyphenyl)-4-(mesitylsulfonyl)-2-methylbut-3-en-2-yl)acetamide (3ai)**

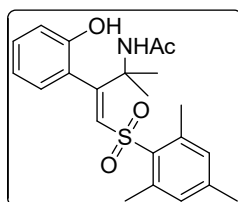

This compound was obtained in 60% yield (48.5 mg) as light yellow oil. Eluent: PE/EA = 3/1,  $R_f = 0.55$ .

$^1\text{H}$  NMR (400 MHz,  $\text{CDCl}_3$ ):  $\delta$  9.82 (s, 1H), 7.19 (t,  $J = 7.7$  Hz, 1H), 6.94-6.91 (m, 3H), 6.85 (brs, 1H), 6.80 (d,  $J = 7.3$  Hz, 1H), 6.75 (t,  $J = 7.3$  Hz, 1H), 6.14 (s, 1H), 2.65 (s, 6H), 2.27 (s, 3H), 2.15 (s, 3H), 1.83 (s, 3H), 1.36 (s, 3H).

$^{13}\text{C}$  NMR (100 MHz,  $\text{CDCl}_3$ ):  $\delta$  171.9, 156.7, 154.5, 143.3, 139.3, 135.7, 132.2, 131.7, 130.0, 127.5, 126.3, 118.8, 117.4, 55.3, 27.2, 26.4, 24.4, 22.8, 21.0.

HRMS (ESI) calculated for  $\text{C}_{22}\text{H}_{28}\text{NO}_4\text{S}$  ( $[\text{M}+\text{H}]^+$ ): 402.1734; found: 402.1730.

**General procedure for the carboamination of *N*-enoxy imides with sulfonyl allenes:**

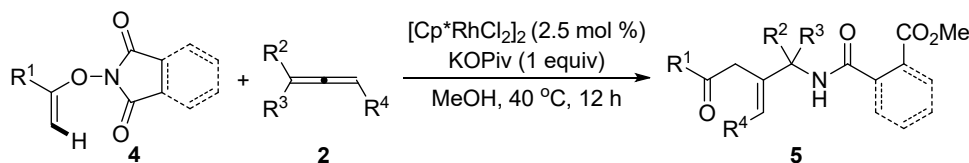

The mixture of *N*-enoxy imide **4** (0.4 mmol, 2.0 equiv), sulfonyl allene **2** (0.2 mmol, 1.0 equiv),  $[\text{Cp}^*\text{RhCl}_2]_2$  (2.5 mol %) and KOPIv (0.2 mmol, 1.0 equiv) in MeOH (2.0

mL) was stirred at 40 °C for 12 h without exclusion of air or moisture. Afterwards, the solvent was removed under reduced pressure, and the resulted mixture was purified by preparative TLC to afford the corresponding allylamine derivatives **5**.

**Characterization of products:**

**(E)-methyl 2-((2-methyl-5-oxo-5-phenyl-3-(tosylmethylene)pentan-2-yl) carbamoyl)benzoate (5a)**

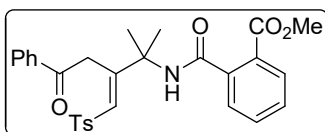

This compound was obtained in 51% yield (52.9 mg) as light yellow oil. Eluent: PE/EA = 2/1.  $R_f = 0.4$ .

**$^1\text{H NMR}$  (400 MHz,  $\text{CDCl}_3$ ):**  $\delta$  8.86 (brs, 1H), 7.94 (d,  $J = 7.8$  Hz, 2H), 7.88-7.83 (m, 3H), 7.79 (d,  $J = 7.7$  Hz, 1H), 7.59-7.53 (m, 2H), 7.50 (d,  $J = 7.6$  Hz, 1H), 7.44 (t,  $J = 7.8$  Hz, 2H), 7.30 (d,  $J = 7.9$  Hz, 2H), 6.11 (s, 1H), 3.75 (s, 3H), 3.55 (s, 2H), 2.42 (s, 3H), 1.45 (s, 6H).

**$^{13}\text{C NMR}$  (100 MHz,  $\text{CDCl}_3$ ):**  $\delta$  199.4, 167.3, 167.0, 156.1, 144.4, 138.4, 138.2, 137.5, 133.3, 132.4, 130.1, 129.8, 129.3, 128.7, 128.3, 127.9, 127.5, 118.1, 52.6, 48.1, 41.0, 28.1, 21.8.

**HRMS (ESI)** calculated for  $\text{C}_{29}\text{H}_{30}\text{NO}_6\text{S}$  ( $[\text{M}^+\text{H}]^+$ ): 520.1788; found: 520.1793.

**(E)-methyl 2-((3-(((4-methoxyphenyl)sulfonyl)methylene)-2-methyl-5-oxo-5-phenylpentan-2-yl)carbamoyl)benzoate (5b)**

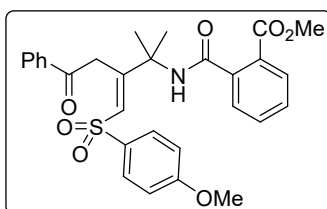

This compound was obtained in 47% yield (50.3 mg) as light yellow oil. Eluent: PE/EA = 2/1.  $R_f = 0.4$ .

**<sup>1</sup>H NMR (400 MHz, CDCl<sub>3</sub>):** δ 8.80 (brs, 1H), 7.95-7.85 (m, 5H), 7.82 (d, *J* = 7.8 Hz, 1H), 7.60-7.53 (m, 2H), 7.50 (d, *J* = 7.7 Hz, 1H), 7.44 (t, *J* = 7.8 Hz, 2H), 6.97 (d, *J* = 8.9 Hz, 2H), 6.11 (s, 1H), 3.86 (s, 3H), 3.76 (s, 3H), 3.54 (s, 2H), 1.44 (s, 6H).

**<sup>13</sup>C NMR (100 MHz, CDCl<sub>3</sub>):** δ 199.5, 167.3, 167.0, 163.6, 155.3, 138.2, 137.5, 133.4, 132.9, 132.4, 130.9, 130.1, 129.8, 129.4, 128.7, 128.3, 128.0, 118.8, 114.4, 55.7, 52.6, 48.1, 41.0, 28.0.

**HRMS (ESI)** calculated for C<sub>29</sub>H<sub>30</sub>NO<sub>7</sub>S ([M+H]<sup>+</sup>): 536.1738; found: 536.1728.

**(*E*)-methyl 2-((3-(((4-chlorophenyl)sulfonyl)methylene)-2-methyl-5-oxo-5-phenylpentan-2-yl)carbamoyl)benzoate (5c)**

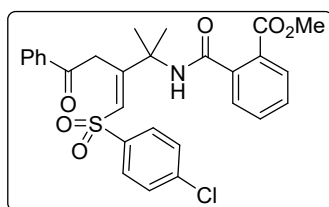

This compound was obtained in 42% yield (45.5 mg) as light yellow oil. Eluent: PE/EA = 2/1. *R<sub>f</sub>* = 0.4.

**<sup>1</sup>H NMR (400 MHz, CDCl<sub>3</sub>):** δ 8.76 (brs, 1H), 7.94-7.91 (m, 4H), 7.88 (d, *J* = 7.8 Hz, 1H), 7.81 (d, *J* = 7.8 Hz, 1H), 7.61-7.55 (m, 2H), 7.51 (d, *J* = 7.5 Hz, 1H), 7.49-7.43 (m, 4H), 6.12 (s, 1H), 3.76 (s, 3H), 3.52 (s, 2H), 1.45 (s, 6H).

**<sup>13</sup>C NMR (100 MHz, CDCl<sub>3</sub>):** δ 199.5, 167.4, 166.9, 156.4, 140.1, 139.7, 138.1, 137.3, 133.5, 132.5, 130.2, 130.1, 129.4, 129.2, 129.1, 128.7, 128.3, 128.0, 117.8, 52.6, 48.2, 41.2, 28.0.

**HRMS (ESI)** calculated for C<sub>28</sub>H<sub>27</sub>ClNO<sub>6</sub>S ([M+H]<sup>+</sup>): 540.1242; found: 540.1235.

**<sup>1</sup>H-<sup>1</sup>H NOESY:**

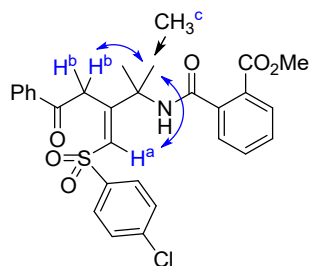

**(E)-methyl 2-((3-(((4-iodophenyl)sulfonyl)methylene)-2-methyl-5-oxo-5-phenylpentan-2-yl)carbamoyl)benzoate (5d)**

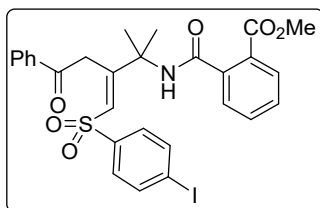

This compound was obtained in 39% yield (49.2 mg) as light yellow oil. Eluent: PE/EA = 2/1.  $R_f = 0.4$ .

**$^1\text{H NMR}$  (400 MHz,  $\text{CDCl}_3$ ):**  $\delta$  8.78 (brs, 1H), 7.93 (d,  $J = 8.0$  Hz, 2H), 7.89-7.85 (m, 3H), 7.79 (d,  $J = 7.8$  Hz, 1H), 7.69 (d,  $J = 8.1$  Hz, 2H), 7.60-7.55 (m, 2H), 7.51 (d,  $J = 7.8$  Hz, 1H), 7.48-7.43 (m, 2H), 6.10 (s, 1H), 3.76 (s, 3H), 3.52 (s, 2H), 1.45 (s, 6H).

**$^{13}\text{C NMR}$  (100 MHz,  $\text{CDCl}_3$ ):**  $\delta$  199.5, 167.3, 166.9, 156.6, 140.9, 138.4, 138.1, 137.3, 133.5, 132.5, 131.3, 130.2, 130.1, 129.0, 128.8, 128.6, 128.3, 127.9, 125.2, 117.4, 101.4, 52.6, 48.2, 41.2, 28.0.

**HRMS (ESI)** calculated for  $\text{C}_{28}\text{H}_{27}\text{INO}_6\text{S}$  ( $[\text{M}+\text{H}]^+$ ): 632.0598; found: 632.0592.

**(E)-methyl 2-((3-(((4-(methoxycarbonyl)phenyl)sulfonyl)methylene)-2-methyl-5-oxo-5-phenylpentan-2-yl)carbamoyl)benzoate (5e)**

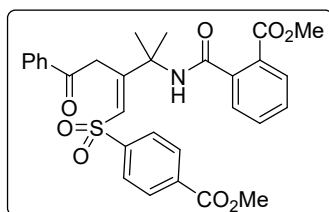

This compound was obtained in 52% yield (58.6 mg) as light yellow oil. Eluent: PE/EA = 2/1.  $R_f = 0.4$ .

**$^1\text{H NMR}$  (400 MHz,  $\text{CDCl}_3$ ):**  $\delta$  8.85 (brs, 1H), 8.16 (d,  $J = 8.1$  Hz, 2H), 8.06 (d,  $J = 8.0$  Hz, 2H), 7.93 (d,  $J = 7.6$  Hz, 2H), 7.88 (d,  $J = 7.7$  Hz, 1H), 7.79 (d,  $J = 7.6$  Hz, 1H), 7.61-7.54 (m, 2H), 7.51 (d,  $J = 7.7$  Hz, 1H), 7.46-7.43 (m, 2H), 6.14 (s, 1H), 3.95 (s, 3H), 3.75 (s, 3H), 3.54 (s, 2H), 1.45 (s, 6H).

**<sup>13</sup>C NMR (100 MHz, CDCl<sub>3</sub>):** δ 199.5, 167.3, 166.9, 165.8, 157.2, 145.1, 138.1, 137.2, 134.4, 133.5, 132.5, 130.3, 130.2, 130.1, 129.1, 128.9, 128.7, 128.3, 127.9, 127.6, 125.3, 117.0, 52.8, 52.6, 48.2, 41.2, 28.0.

**HRMS (ESI)** calculated for C<sub>30</sub>H<sub>30</sub>NO<sub>8</sub>S ([M+H]<sup>+</sup>): 564.1687; found: 564.1683.

**(E)-methyl 2-((2-methyl-5-oxo-5-phenyl-3-((m-tolylsulfonyl)methylene)pentan-2-yl)carbamoyl)benzoate (5f)**

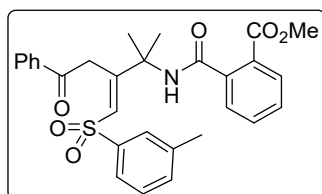

This compound was obtained in 43% yield (44.8 mg) as light yellow oil. Eluent: PE/EA = 2/1. R<sub>f</sub> = 0.4.

**<sup>1</sup>H NMR (400 MHz, CDCl<sub>3</sub>):** δ 8.92 (brs, 1H), 7.94 (d, *J* = 7.8 Hz, 2H), 7.86 (d, *J* = 8.2 Hz, 1H), 7.79-7.74 (m, 3H), 7.70 (s, 1H), 7.58-7.53 (m, 2H), 7.48 (d, *J* = 7.6 Hz, 1H), 7.45 (d, *J* = 7.9 Hz, 2H), 7.40-7.39 (m, 1H), 6.10 (s, 1H), 3.74 (s, 3H), 3.58 (s, 2H), 2.41 (s, 3H), 1.46 (s, 6H).

**<sup>13</sup>C NMR (100 MHz, CDCl<sub>3</sub>):** δ 199.5, 167.4, 166.9, 156.4, 140.1, 139.7, 138.1, 137.3, 133.5, 132.5, 130.2, 130.1, 129.4, 129.2, 129.1, 128.7, 128.3, 128.0, 117.8, 52.6, 48.2, 40.9, 28.1, 21.5.

**HRMS (ESI)** calculated for C<sub>29</sub>H<sub>30</sub>NO<sub>6</sub>S ([M+H]<sup>+</sup>): 520.1788; found: 520.1784.

**(E)-methyl 2-((3-methyl-6-oxo-6-phenyl-4-(tosylmethylene)hexan-3-yl)carbamoyl)benzoate (5g)**

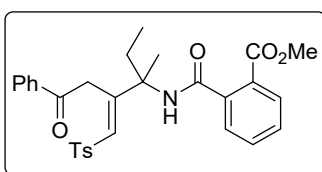

This compound was obtained in 65% yield (69.2 mg) as light yellow oil. Eluent: PE/EA = 2/1. R<sub>f</sub> = 0.4.

**<sup>1</sup>H NMR (400 MHz, CDCl<sub>3</sub>):** δ 8.68 (brs, 1H), 7.93 (d, *J* = 7.8 Hz, 2H), 7.87-7.81 (m, 4H), 7.59-7.53 (m, 2H), 7.50-7.42 (m, 3H), 7.30-7.26 (m, 2H), 6.08 (s, 1H), 3.75 (s, 3H), 3.67 (d, *J* = 17.3 Hz, 1H), 3.35 (d, *J* = 17.0 Hz, 1H), 2.41 (s, 3H), 2.10-2.03 (m, 1H), 1.79-1.74 (m, 1H), 1.31 (s, 3H), 0.89 (t, *J* = 7.5 Hz, 3H).

**<sup>13</sup>C NMR (100 MHz, CDCl<sub>3</sub>):** δ 199.7, 167.3, 167.0, 154.3, 144.4, 138.5, 138.3, 137.5, 133.4, 132.4, 130.0, 129.8, 129.2, 128.7, 128.3, 128.0, 127.5, 120.1, 52.5, 46.9, 44.7, 32.5, 23.8, 21.8, 8.8.

**HRMS (ESI)** calculated for C<sub>30</sub>H<sub>32</sub>NO<sub>6</sub>S ([M+H]<sup>+</sup>): 534.1945; found: 534.1941.

**(*E*)-methyl 2-((3-methyl-6-oxo-1,6-diphenyl-4-(tosylmethylene)hexan-3-yl)carbamoyl)benzoate (5h)**

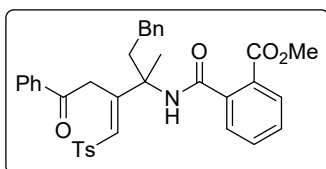

This compound was obtained in 59% yield (71.8 mg) as light yellow oil. Eluent: PE/EA = 2/1. R<sub>f</sub> = 0.4.

**<sup>1</sup>H NMR (400 MHz, CDCl<sub>3</sub>):** δ 8.61 (brs, 1H), 7.93-7.88 (m, 4H), 7.85 (d, *J* = 7.7 Hz, 2H), 7.59-7.53 (m, 2H), 7.50-7.42 (m, 3H), 7.30 (d, *J* = 8.2 Hz, 2H), 7.22 (d, *J* = 7.1 Hz, 2H), 7.17-7.13 (m, 3H), 6.15 (s, 1H), 3.74-3.68 (m, 4H), 3.38 (d, *J* = 17.2 Hz, 1H), 2.69-2.61 (m, 1H), 2.57-2.49 (m, 1H), 2.40 (s, 3H), 2.37-2.30 (m, 1H), 2.03-1.95 (m, 1H), 1.42 (s, 3H).

**<sup>13</sup>C NMR (100 MHz, CDCl<sub>3</sub>):** δ 199.5, 167.5, 167.0, 154.0, 144.5, 142.1, 138.4, 138.2, 137.5, 133.4, 132.4, 130.0, 129.9, 129.8, 129.3, 128.7, 128.6, 128.5, 128.4, 128.3, 128.1, 127.6, 126.0, 120.8, 52.5, 47.2, 44.7, 42.0, 30.7, 24.3, 21.8.

**HRMS (ESI)** calculated for C<sub>36</sub>H<sub>36</sub>NO<sub>6</sub>S ([M+H]<sup>+</sup>): 610.2258; found: 610.2251.

**(*E*)-ethyl 2-((2-methyl-5-oxo-5-phenyl-3-(tosylmethylene)pentan-2-yl)carbamoyl)benzoate (5i)**



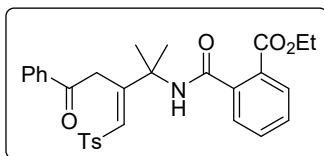

This compound was obtained in 53% yield (56.7 mg) as light yellow oil. Eluent: PE/EA = 2/1.  $R_f = 0.4$ .

**$^1\text{H}$  NMR (400 MHz, DMSO- $d_6$ ):**  $\delta$  9.51 (s, 1H), 7.91 (d,  $J = 7.8$  Hz, 2H), 7.85 (d,  $J = 7.6$  Hz, 1H), 7.81-7.76 (m, 3H), 7.68 (t,  $J = 7.5$  Hz, 1H), 7.62-7.53 (m, 2H), 7.49 (t,  $J = 7.8$  Hz, 2H), 7.39 (d,  $J = 8.0$  Hz, 2H), 6.48 (s, 1H), 4.19 (q,  $J = 7.3$  Hz, 2H), 3.39 (s, 2H), 2.39 (s, 3H), 1.25 (s, 6H), 1.22 (t,  $J = 7.1$  Hz, 3H).

**$^{13}\text{C}$  NMR (100 MHz,  $\text{CDCl}_3$ ):**  $\delta$  199.4, 167.4, 166.4, 156.3, 144.4, 138.4, 138.3, 137.5, 133.3, 132.2, 130.0, 129.8, 129.6, 128.8, 128.6, 128.3, 127.9, 127.5, 117.7, 61.5, 48.0, 41.0, 28.1, 21.8, 14.3.

**HRMS (ESI)** calculated for  $\text{C}_{30}\text{H}_{32}\text{NO}_6\text{S}$  ( $[\text{M}+\text{H}]^+$ ): 534.1945; found: 534.1940.

**(E)-methyl 2-((3-((diphenylphosphoryl)methylene)-2-methyl-5-oxo-5-phenylpentan-2-yl)carbamoyl)benzoate (5j)**

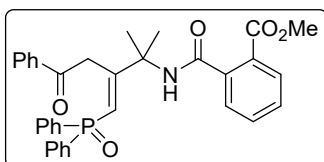

This compound was obtained in 62% yield (70.0 mg) as white solid. Eluent: PE/EA = 1/2.  $R_f = 0.5$ .

**$^1\text{H}$  NMR (400 MHz,  $\text{CD}_3\text{OD}$ ):**  $\delta$  8.02 (d,  $J = 7.9$  Hz, 2H), 7.82-7.76 (m, 5H), 7.67 (d,  $J = 7.7$  Hz, 1H), 7.56-7.53 (m, 3H), 7.50-7.46 (m, 8H), 6.26-6.21 (m, 1H), 3.74 (s, 3H), 3.57 (s, 2H), 1.47 (s, 6H).

**$^{13}\text{C}$  NMR (100 MHz,  $\text{CDCl}_3$ ):**  $\delta$  199.6, 167.4, 167.1, 164.9 (d,  $J = 4.3$  Hz), 138.4, 138.1, 133.9, 132.9, 132.0, 131.9, 131.3, 131.2, 129.9, 129.6, 129.3, 128.8, 128.7, 128.5, 128.4, 128.3, 127.7, 125.8, 123.4, 105.8 (d,  $J = 100.9$  Hz), 52.3, 47.8, 41.0 (d,  $J = 11.1$  Hz), 28.9.

**$^{31}\text{P}$  NMR (162 MHz,  $\text{CDCl}_3$ ):**  $\delta$  27.37.

**HRMS (ESI)** calculated for  $\text{C}_{34}\text{H}_{33}\text{NO}_5\text{P}$  ( $[\text{M}+\text{H}]^+$ ): 566.2091; found: 566.2088.

**(E)-methyl 4-((2-methyl-5-oxo-5-phenyl-3-(tosylmethylene)pentan-2-yl)amino)-4-oxobutanoate (5k)**

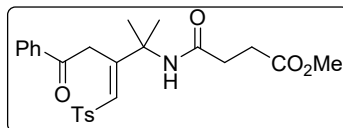

This compound was obtained in 52% yield (48.9 mg) as light yellow oil. Eluent: PE/EA = 2/1.  $R_f = 0.4$ .

**$^1\text{H NMR}$  (400 MHz,  $\text{CDCl}_3$ ):**  $\delta$  8.45 (brs, 1H), 7.88 (d,  $J = 7.9$  Hz, 2H), 7.79 (d,  $J = 8.5$  Hz, 2H), 7.58-7.55 (m, 1H), 7.46-7.43 (m, 2H), 7.31 (d,  $J = 8.2$  Hz, 2H), 6.06 (s, 1H), 3.64 (s, 3H), 3.32 (s, 2H), 2.69-2.63 (m, 4H), 2.43 (s, 3H), 1.32 (s, 6H).

**$^{13}\text{C NMR}$  (100 MHz,  $\text{CDCl}_3$ ):**  $\delta$  198.9, 173.3, 170.6, 156.1, 144.4, 138.4, 137.3, 133.5, 129.8, 128.7, 128.2, 127.4, 52.0, 48.4, 40.6, 31.8, 29.0, 27.8, 21.8.

**HRMS (ESI)** calculated for  $\text{C}_{25}\text{H}_{30}\text{NO}_6\text{S}$  ( $[\text{M}+\text{H}]^+$ ): 472.1788; found: 472.1789.

**$^1\text{H}$ - $^1\text{H}$  NOESY:**

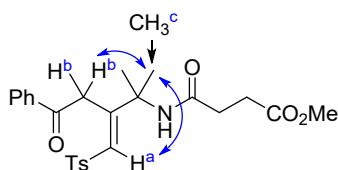

**(E)-methyl 4-((5-(4-(tert-butyl)phenyl)-2-methyl-5-oxo-3-(tosylmethylene)pentan-2-yl)amino)-4-oxobutanoate (5l)**

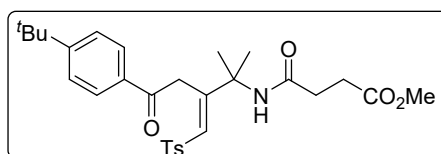

This compound was obtained in 48% yield (50.5 mg) as light yellow oil. Eluent: PE/EA = 2/1.  $R_f = 0.4$ .

**$^1\text{H NMR}$  (400 MHz,  $\text{CDCl}_3$ ):**  $\delta$  8.40 (brs, 1H), 7.84-7.79 (m, 4H), 7.46 (d,  $J = 8.1$  Hz, 2H), 7.31 (d,  $J = 8.1$  Hz, 2H), 6.07 (s, 1H), 3.64 (s, 3H), 3.28 (s, 2H), 2.70-2.65 (m, 4H), 2.43 (s, 3H), 1.34 (s, 9H), 1.31 (s, 6H).

**$^{13}\text{C NMR}$  (100 MHz,  $\text{CDCl}_3$ ):**  $\delta$  198.7, 173.3, 170.6, 157.4, 156.1, 144.4, 138.5, 134.7, 129.8, 128.3, 127.5, 125.7, 52.0, 48.4, 40.7, 35.3, 31.8, 31.2, 29.1, 27.8, 21.8.

HRMS (ESI) calculated for C<sub>29</sub>H<sub>38</sub>NO<sub>6</sub>S ([M+H]<sup>+</sup>): 528.2414; found: 528.2414.

**(E)-methyl 4-((5-(4-chlorophenyl)-2-methyl-5-oxo-3-(tosylmethylene)pentan-2-yl)amino)-4-oxobutanoate (5m)**

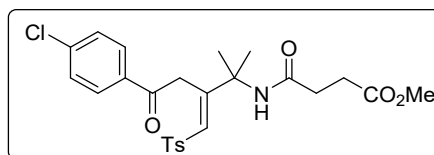

This compound was obtained in 67% yield (67.6 mg) as light yellow oil. Eluent: PE/EA = 2/1. R<sub>f</sub> = 0.4.

<sup>1</sup>H NMR (400 MHz, CDCl<sub>3</sub>): δ 8.53 (brs, 1H), 7.82 (d, *J* = 8.3 Hz, 2H), 7.77 (d, *J* = 8.3 Hz, 2H), 7.40 (d, *J* = 8.4 Hz, 2H), 7.30 (d, *J* = 8.2 Hz, 2H), 6.04 (s, 1H), 3.64 (s, 3H), 3.30 (s, 2H), 2.69-2.63 (m, 4H), 2.43 (s, 3H), 1.32 (s, 6H).

<sup>13</sup>C NMR (100 MHz, CDCl<sub>3</sub>): δ 197.7, 173.3, 170.6, 156.3, 144.5, 139.9, 138.4, 135.7, 129.9, 129.7, 129.0, 127.4, 52.0, 48.2, 40.6, 31.8, 29.0, 27.9, 21.8.

HRMS (ESI) calculated for C<sub>25</sub>H<sub>29</sub>ClNO<sub>6</sub>S ([M+H]<sup>+</sup>): 506.1399; found: 506.1403.

**(E)-methyl 4-((3-((diphenylphosphoryl)methylene)-2-methyl-5-oxo-5-phenylpentan-2-yl)amino)-4-oxobutanoate (5n)**

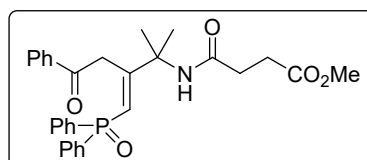

This compound was obtained in 55% yield (56.8 mg) as white solid. Eluent: PE/EA = 1/2. R<sub>f</sub> = 0.5.

<sup>1</sup>H NMR (400 MHz, CDCl<sub>3</sub>): δ 9.59 (brs, 1H), 7.94 (d, *J* = 7.9 Hz, 2H), 7.72-7.67 (m, 4H), 7.54-7.49 (m, 3H), 7.45-7.42 (m, 6H), 5.68 (d, *J* = 19.6 Hz, 1H), 3.56 (s, 3H), 3.51 (s, 2H), 2.48-2.44 (m, 4H), 1.45 (s, 6H).

<sup>13</sup>C NMR (100 MHz, CDCl<sub>3</sub>): δ 199.4, 173.1, 170.5, 164.6, 137.9, 133.9, 133.1, 132.9, 131.9, 131.2, 131.1, 128.8, 128.7, 128.6, 128.2, 106.1 (d, *J* = 101.8 Hz), 51.8, 48.0, 40.8 (d, *J* = 10.5 Hz), 31.7, 29.1, 28.7.

<sup>31</sup>P NMR (162 MHz, CDCl<sub>3</sub>): δ 26.75.

HRMS (ESI) calculated for C<sub>30</sub>H<sub>33</sub>NO<sub>5</sub>P ([M+H]<sup>+</sup>): 518.2091; found: 518.2088.

### III. Synthetic Applications

#### Late-stage C-H modification of complex molecules:

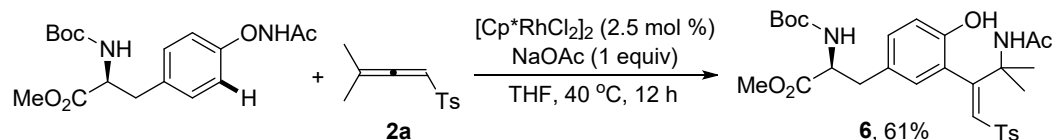

The mixture of tyrosine derivative (0.2 mmol, 1.0 equiv), sulfonfyl allene **2a** (0.2 mmol, 1.0 equiv),  $[\text{Cp}^*\text{RhCl}_2]_2$  (2.5 mol %) and NaOAc (0.2 mmol, 1.0 equiv) in THF (2.0 mL) was stirred at 40 °C for 12 h without exclusion of air or moisture. Afterwards, the solvent was removed under reduced pressure, and the resulted mixture was purified by preparative TLC (Eluent: PE/EA = 2/1,  $R_f = 0.4$ ) to afford the desired product **6** in 61% (71.6 mg) isolated yield as yellowish oil. NMR analysis showed that the tautomerization was observed in  $\text{CDCl}_3$ .

**$^1\text{H}$  NMR (400 MHz,  $\text{CDCl}_3$ ):**  $\delta$  9.77-9.74 (m, 1H), 7.81-7.75 (m, 2H), 7.33 (d,  $J = 8.1$  Hz, 2H), 6.93-6.81 (m, 3H), 6.51 (s, 1H), 6.10-6.05 (m, 1H), 4.95 (t,  $J = 9.0$  Hz, 1H), 4.55-4.42 (m, 1H), 3.63-3.56 (m, 3H), 3.03-2.84 (m, 2H), 2.42 (s, 3H), 2.13 (s, 3H), 1.82-1.80 (m, 3H), 1.39 (s, 9H), 1.34-1.31 (m, 3H).

**$^{13}\text{C}$  NMR (100 MHz,  $\text{CDCl}_3$ ):**  $\delta$  172.5, 172.3, 171.7, 157.2, 155.1, 155.0, 153.5, 144.8, 138.8, 131.1, 131.0, 130.4, 130.3, 130.1, 128.6, 128.4, 127.4, 126.13, 126.07, 117.44, 117.36, 80.0, 55.29, 55.25, 54.7, 54.5, 52.2, 52.1, 37.44, 37.36, 28.4, 28.1, 26.3, 24.2, 21.7.

**HRMS (ESI)** calculated for  $\text{C}_{29}\text{H}_{39}\text{N}_2\text{O}_8\text{S}$  ( $[\text{M}+\text{H}]^+$ ): 575.2422; found: 575.2421.

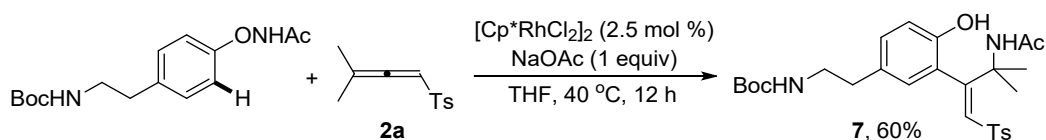

The mixture of dopamine derivative (0.2 mmol, 1.0 equiv), sulfonfyl allene **2a** (0.2 mmol, 1.0 equiv),  $[\text{Cp}^*\text{RhCl}_2]_2$  (2.5 mol %) and NaOAc (0.2 mmol, 1.0 equiv) in THF (2.0 mL) was stirred at 40 °C for 12 h without exclusion of air or moisture. Afterwards, the solvent was removed under reduced pressure, and the resulted

mixture was purified by preparative TLC (Eluent: PE/EA = 2/1,  $R_f$  = 0.4) to afford the desired product **7** in 60% (61.8 mg) isolated yield as light yellow solid, m.p.: 118-121 °C.

**$^1\text{H}$  NMR (400 MHz,  $\text{CDCl}_3$ ):**  $\delta$  9.67 (s, 1H), 7.79 (d,  $J$  = 7.9 Hz, 2H), 7.34 (d,  $J$  = 7.8 Hz, 2H), 7.00 (d,  $J$  = 8.2 Hz, 1H), 6.85 (d,  $J$  = 8.3 Hz, 1H), 6.77 (s, 1H), 6.58 (s, 1H), 6.09 (s, 1H), 4.52 (brs, 1H), 3.33-3.18 (m, 2H), 2.64 (t,  $J$  = 6.4 Hz, 2H), 2.43 (s, 3H), 2.14 (s, 3H), 1.81 (s, 3H), 1.41 (s, 9H), 1.34 (s, 3H).

**$^{13}\text{C}$  NMR (100 MHz,  $\text{CDCl}_3$ ):**  $\delta$  171.7, 157.2, 156.0, 152.8, 144.7, 138.8, 130.3, 130.2, 130.1, 129.1, 127.8, 127.4, 126.1, 117.4, 79.3, 55.3, 42.1, 35.2, 28.5, 28.1, 26.3, 24.2, 21.7.

**HRMS (ESI)** calculated for  $\text{C}_{27}\text{H}_{37}\text{N}_2\text{O}_6\text{S}$  ( $[\text{M}+\text{H}]^+$ ): 517.2367; found: 517.2366.

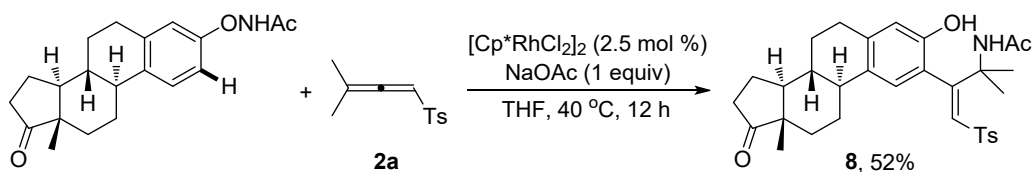

The mixture of estrone derivative (0.2 mmol, 1.0 equiv), sulfonfyl allene **2a** (0.2 mmol, 1.0 equiv),  $[\text{Cp}^*\text{RhCl}_2]_2$  (2.5 mol %) and NaOAc (0.2 mmol, 1.0 equiv) in THF (2.0 mL) was stirred at 40 °C for 12 h without exclusion of air or moisture. Afterwards, the solvent was removed under reduced pressure, and the resulted mixture was purified by preparative TLC (Eluent: PE/EA = 2/1,  $R_f$  = 0.5) to afford the desired product **8** in 52% (56.0 mg) isolated yield as light yellow solid, m.p.: 185-186 °C. NMR analysis showed that the tautomerization was observed in  $\text{CDCl}_3$ .

**$^1\text{H}$  NMR (400 MHz,  $\text{DMSO}-d_6$ ):**  $\delta$  9.86 (s, 1H), 8.82 (s, 1H), 7.75 (d,  $J$  = 7.7 Hz, 2H), 7.42 (s, 2H), 6.80 (s, 1H), 6.46 (s, 1H), 5.99 (s, 1H), 2.75-2.70 (m, 2H), 2.43-2.35 (m, 4H), 2.27-2.21 (m, 1H), 2.08-1.98 (m, 2H), 1.90-1.85 (m, 5H), 1.75-1.69 (m, 1H), 1.58-1.43 (m, 6H), 1.32-1.24 (m, 6H), 0.79 (s, 3H).

**$^{13}\text{C}$  NMR (100 MHz,  $\text{CDCl}_3$ ):**  $\delta$  221.2, 171.6, 157.7, 157.6, 152.1, 152.0, 144.7, 138.90, 138.86, 138.6, 130.3, 130.2, 130.0, 127.4, 124.6, 124.2, 123.9, 117.0, 116.9,

55.34, 55.31, 50.5, 50.4, 48.1, 48.0, 43.9, 43.8, 31.6, 31.5, 29.31, 29.25, 28.20, 28.15, 26.54, 26.50, 26.46, 26.42, 14.0, 13.9.

**HRMS (ESI)** calculated for  $C_{32}H_{40}NO_5S$  ( $[M+H]^+$ ): 550.2622; found: 550.2619.

### Derivatization of compound **3aa**:

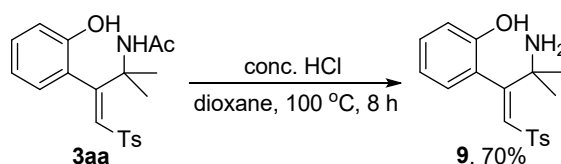

A sealed tube was charged with **3aa** (0.1 mmol, 1.0 equiv) in 1,4-dioxane (0.5 mL), followed by the addition of concentrated HCl solution (0.5 mL). The reaction mixture was stirred at 100 °C for 8 h. Afterwards, the resulted mixture was quenched with saturated  $\text{NaHCO}_3$  and extracted by EA for three times. The combined extracts were washed with brine and dried over  $\text{Na}_2\text{SO}_4$ . The solvent was evaporated, and the residue was purified by preparative TLC (Eluent: PE/EA = 1/1,  $R_f$  = 0.5) to afford the desired product **9** in 70% (23.3 mg) isolated yield as light yellow oil.

**$^1\text{H NMR}$  (400 MHz,  $\text{DMSO}-d_6$ ):**  $\delta$  7.83 (d,  $J$  = 7.8 Hz, 2H), 7.45 (d,  $J$  = 7.7 Hz, 2H), 7.11 (t,  $J$  = 7.6 Hz, 1H), 6.88 (d,  $J$  = 7.3 Hz, 1H), 6.77-6.70 (m, 2H), 6.10 (s, 1H), 2.40 (s, 3H), 1.37 (s, 6H).

**$^{13}\text{C NMR}$  (100 MHz,  $\text{CDCl}_3$ ):**  $\delta$  158.6, 154.8, 145.0, 138.7, 133.5, 130.1, 129.9, 128.7, 128.0, 127.6, 119.2, 116.9, 53.1, 31.6, 21.7.

**HRMS (ESI)** calculated for  $C_{18}H_{22}NSO_3$  ( $[M+H]^+$ ): 332.1315; found: 332.1316.

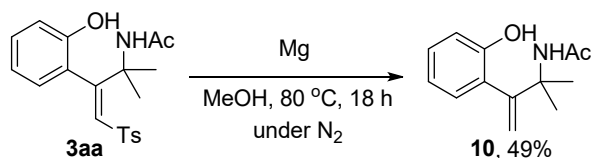

The mixture of **3aa** (0.2 mmol, 1.0 equiv) and Mg (2 mmol, 10 equiv) in MeOH (4.0 mL) was stirred at 80 °C for 18 h under an atmosphere of  $\text{N}_2$ . Afterwards, the reaction mixture was cooled to room temperature and filtered, the filtrate was concentrated and purified by preparative TLC (eluent: PE/EA = 2/1,  $R_f$  = 0.6) to give the target product in 49% isolated yield (21.5 mg) as light yellow oil.

**<sup>1</sup>H NMR (400 MHz, CDCl<sub>3</sub>):** δ 8.96 (s, 1H), 7.18 (t, *J* = 7.7 Hz, 1H), 6.93-6.86 (m, 2H), 6.78 (t, *J* = 7.3 Hz, 1H), 6.07 (brs, 1H), 5.51 (s, 1H), 5.15 (s, 1H), 2.03 (s, 3H), 1.38 (s, 6H).

**<sup>13</sup>C NMR (100 MHz, CDCl<sub>3</sub>):** δ 170.1, 155.0, 150.4, 129.1, 129.0, 127.6, 118.8, 116.5, 116.2, 56.5, 29.8, 24.0.

**HRMS (ESI)** calculated for C<sub>13</sub>H<sub>18</sub>NO<sub>2</sub> ([M+H]<sup>+</sup>): 220.1332; found: 220.1331.

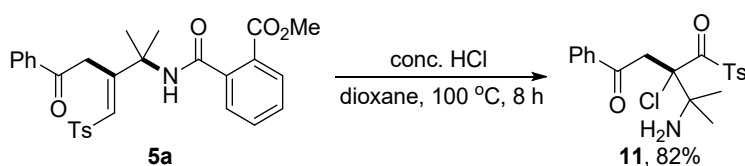

A sealed tube was charged with **5a** (0.1 mmol, 1.0 equiv) in 1,4-dioxane (0.5 mL), followed by the addition of concentrated HCl solution (0.5 mL). The reaction mixture was stirred at 100 °C for 8 h. Afterwards, the resulted mixture was quenched with saturated NaHCO<sub>3</sub> and extracted by EA for three times. The combined extracts were washed with brine and dried over Na<sub>2</sub>SO<sub>4</sub>. The solvent was evaporated, and the residue was purified by preparative TLC (Eluent: PE/EA = 2/1, R<sub>f</sub> = 0.6) to afford the desired product **11** in 82% yield (33.3 mg) as light yellow oil.

**<sup>1</sup>H NMR (400 MHz, DMSO-*d*<sub>6</sub>):** δ 7.90 (d, *J* = 7.5 Hz, 2H), 7.80 (d, *J* = 8.1 Hz, 2H), 7.64 (t, *J* = 7.4 Hz, 1H), 7.51 (t, *J* = 7.5 Hz, 2H), 7.43 (d, *J* = 7.9 Hz, 2H), 4.83 (s, 2H), 3.47 (s, 2H), 2.40 (s, 3H), 1.09 (s, 6H).

**<sup>13</sup>C NMR (100 MHz, CDCl<sub>3</sub>):** δ 203.7, 198.0, 145.0, 136.5, 136.1, 133.7, 129.8, 128.78, 128.77, 128.2, 62.8, 51.7, 45.9, 25.1, 21.8.

**HRMS (ESI)** calculated for C<sub>20</sub>H<sub>22</sub>Cl<sub>2</sub>NSO<sub>4</sub> ([M+Cl]<sup>-</sup>): 442.0652; found: 442.0647.

### Switchable assembly of compound **3aa'**:

The mixture of *N*-phenoxyacetamide **1a** (0.1 mmol, 1.0 equiv), sulfonyl allene **2a** (0.1 mmol, 1.0 equiv), [Cp\**Rh*Cl<sub>2</sub>]<sub>2</sub> (5 mol %) and NaOAc (1 equiv) in the solvent was stirred in an oil bath without exclusion of air or moisture. Afterwards, it was diluted with EtOAc and filtered through a short silica gel column to remove the metal

residues. Then, the reaction mixture was concentrated and purified by preparative TLC (eluent: PE/EA = 3/1,  $R_f = 0.6$ ) to afford the corresponding product **3aa'**.

**Table S3.** Conditions Screening for the Synthesis of **3aa'**.<sup>a</sup>

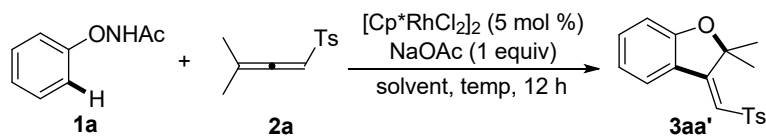

| #  | solvent           | pH of PBS | 1a:2a | Temp/°C | yield(%) <sup>b</sup> |
|----|-------------------|-----------|-------|---------|-----------------------|
| 1  | THF/PBS = 1/1     | 4.2       | 1:1   | 40      | 19                    |
| 2  | THF/PBS = 1/1     | 7.0       | 1:1   | 40      | 20                    |
| 3  | THF/PBS = 1/1     | 9.4       | 1:1   | 40      | 20                    |
| 4  | PBS               | 7.0       | 1:1   | 40      | 15                    |
| 5  | dioxane/PBS = 1/1 | 7.0       | 1:1   | 40      | 13                    |
| 6  | MeOH/PBS = 1/1    | 7.0       | 1:1   | 40      | 25                    |
| 7  | MeOH/PBS = 1/1    | 7.0       | 1:1   | 80      | 31                    |
| 8  | MeOH/PBS = 1/1    | 7.0       | 1:1.5 | 80      | 55                    |
| 9  | MeOH/PBS = 1/1    | 7.0       | 1:2   | 80      | 61                    |
| 10 | MeOH/PBS = 2/1    | 7.0       | 1:2   | 80      | 60                    |
| 11 | MeOH/PBS = 4/1    | 7.0       | 1:2   | 80      | 72 (69) <sup>c</sup>  |
| 12 | MeOH/PBS = 6/1    | 7.0       | 1:2   | 80      | 66                    |

<sup>a</sup>Reaction Conditions: **1a** (0.1 mmol), **2a**, [Cp\*RhCl<sub>2</sub>]<sub>2</sub> (5 mol %), NaOAc (1.0 equiv), solvent (0.5 mL), temperature, 12 h, under air. <sup>b</sup><sup>1</sup>H-NMR yields using 1,3,5-trimethoxybenzene as an internal standard. <sup>c</sup>Isolated yield was reported in the parentheses.

### 2,2-dimethyl-3-(tosylmethylene)-2,3-dihydrobenzofuran (**3aa'**)

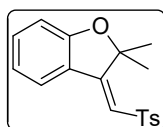

<sup>1</sup>H NMR (400 MHz, CDCl<sub>3</sub>): δ 7.95 (d,  $J = 8.1$  Hz, 2H), 7.31 (d,  $J = 7.9$  Hz, 2H), 7.25 (t,  $J = 7.7$  Hz, 1H), 7.16 (d,  $J = 7.3$  Hz, 1H), 7.12-7.06 (m, 2H), 5.80 (s, 1H), 2.41 (s, 3H), 1.40 (s, 6H).

<sup>13</sup>C NMR (100 MHz, CDCl<sub>3</sub>): δ 175.9, 155.4, 143.8, 140.0, 133.3, 129.5, 128.8, 127.4, 124.1, 122.5, 110.7, 102.3, 46.8, 29.0, 21.7.

HRMS (ESI) calculated for C<sub>18</sub>H<sub>19</sub>SO<sub>3</sub> ([M+H]<sup>+</sup>): 315.1050; found: 315.1050.

### Conversion of compound **3aa** to **3aa'**:



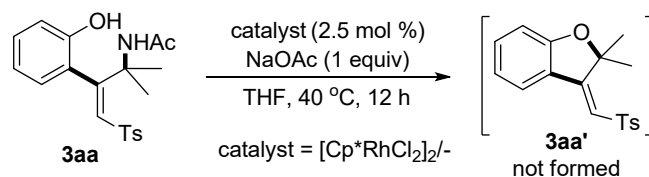

Two batches of the mixture of compound **3aa** (0.1 mmol, 1.0 equiv) and NaOAc (1 equiv) in THF (0.1 M) was stirred in an oil bath in the presence or absence of  $[\text{Cp}^*\text{RhCl}_2]_2$  (2.5 mol %) without exclusion of air or moisture. Afterwards, the reaction was monitored by TLC and no corresponding dihydrobenzofuran product **3aa'** was formed.

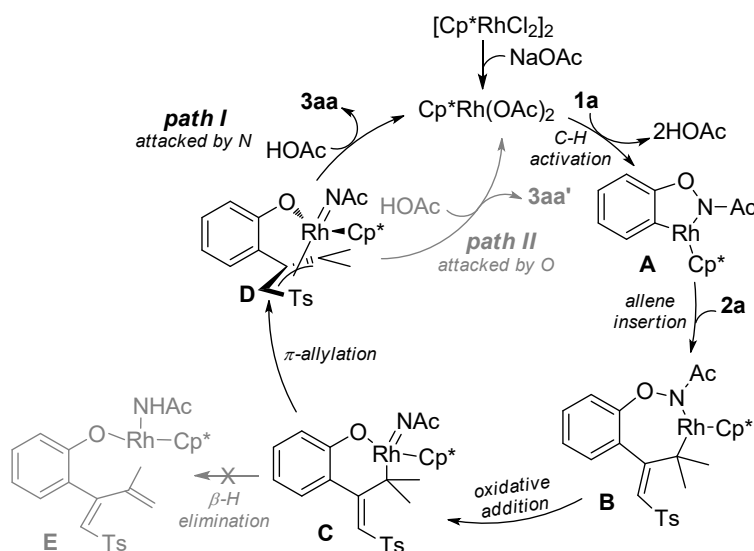

**Scheme S1** Proposed Catalytic Cycle for the C-H Coupling of *N*-Phenoxyacetamide with Sulfonyl Allene

### Proposed catalytic cycle for *N*-enoxyphthalimide substrate:

Initially, *N*-enoxyphthalimide **4a** converted into the active substrate **F** with the assistance of MeOH, which underwent the Rh(III)-catalyzed N-H/C-H bond cleavage to afford the intermediate **G**. Subsequent allene insertion from **G** delivered the seven-membered intermediate **H**, which underwent the oxidative addition followed by a C-N bond reductive elimination to give intermediate **J**. Alternatively, the direct C-N bond reductive elimination from **H** could also be involved to afford intermediate **K** along

with the generation of Rh(I) species, further O-N bond cleavage re-oxidized the Rh(I) to intermediate **J**. Finally, the protonolysis of intermediate **J** led to the release of desired carboamination product **5a** with the regeneration of active Cp\*Rh(OAc)<sub>2</sub> catalyst.

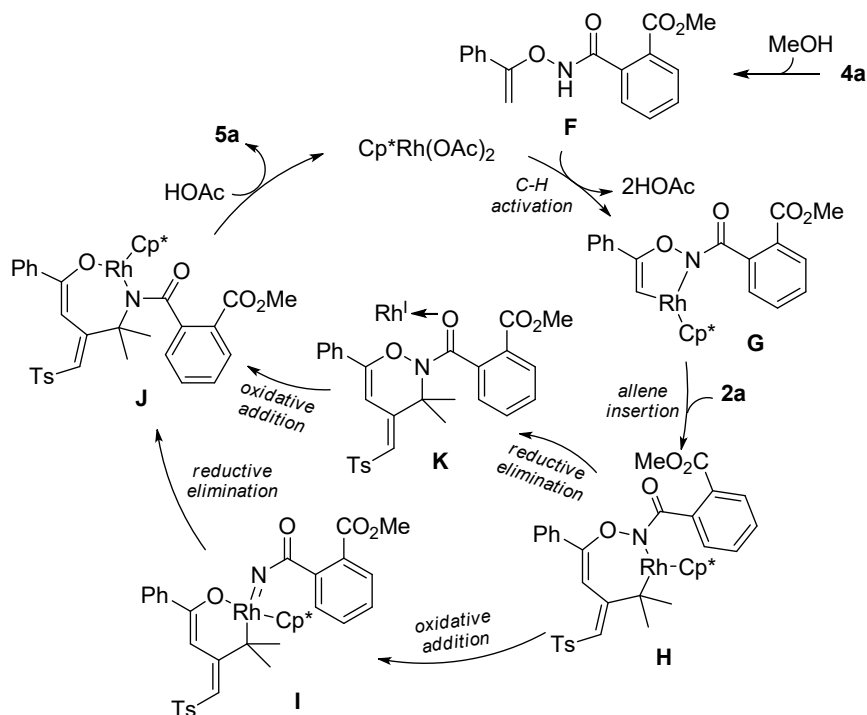

**Scheme S2** Proposed Catalytic Cycle for the C-H Coupling of *N*-Enoxyphthalimide with Sulfonyl Allene

## IV. X-Ray Crystallographic Data

### X-ray crystallographic data of compound **3aa**:

Single crystals of C<sub>20</sub>H<sub>23</sub>NO<sub>4</sub>S [805-3B] were prepared using the mixed PE/EA solvent at room temperature. A suitable crystal was selected and on a SuperNova, Dual, Cu at zero, AtlasS2 diffractometer. The crystal was kept at 149.99(10) K during data collection.

Crystal Data for C<sub>20</sub>H<sub>23</sub>NO<sub>4</sub>S (*M* = 373.45 g/mol): monoclinic, space group P2<sub>1</sub>/c (no. 14), *a* = 19.1418(19) Å, *b* = 11.1056(12) Å, *c* = 20.762(2) Å, β = 90.211(11)°, *V* = 4413.7(8) Å<sup>3</sup>, *Z* = 8, *T* = 149.99(10) K, μ(Mo Kα) = 0.168 mm<sup>-1</sup>, *D*<sub>calc</sub> = 1.124 g/cm<sup>3</sup>, 25767 reflections measured (3.924° ≤ 2θ ≤ 50°), 7719 unique (*R*<sub>int</sub> =

0.0947,  $R_{\text{sigma}} = 0.0922$ ) which were used in all calculations. The final  $R_1$  was 0.0950 ( $I > 2\sigma(I)$ ) and  $wR_2$  was 0.2662 (all data).

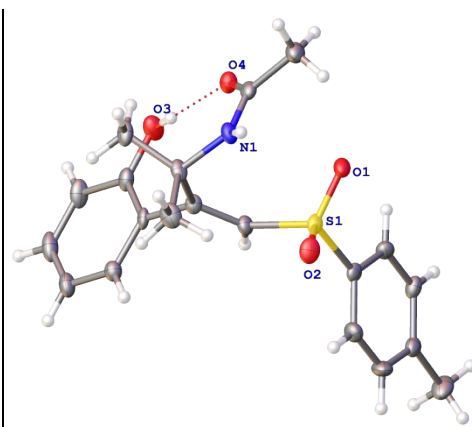

Table S4. Crystal data and structure refinement for 805-3B

|                                                |                                                                  |
|------------------------------------------------|------------------------------------------------------------------|
| Identification code                            | 805-3B                                                           |
| Empirical formula                              | $C_{20}H_{23}NO_4S$                                              |
| Formula weight                                 | 373.45                                                           |
| Temperature/K                                  | 149.99(10)                                                       |
| Crystal system                                 | monoclinic                                                       |
| Space group                                    | $P2_1/c$                                                         |
| a/Å                                            | 19.1418(19)                                                      |
| b/Å                                            | 11.1056(12)                                                      |
| c/Å                                            | 20.762(2)                                                        |
| $\alpha/^\circ$                                | 90                                                               |
| $\beta/^\circ$                                 | 90.211(11)                                                       |
| $\gamma/^\circ$                                | 90                                                               |
| Volume/Å <sup>3</sup>                          | 4413.7(8)                                                        |
| Z                                              | 8                                                                |
| $\rho_{\text{calc}}/\text{g/cm}^3$             | 1.124                                                            |
| $\mu/\text{mm}^{-1}$                           | 0.168                                                            |
| F(000)                                         | 1584.0                                                           |
| Crystal size/mm <sup>3</sup>                   | 0.15 × 0.12 × 0.11                                               |
| Radiation                                      | Mo K $\alpha$ ( $\lambda = 0.71073$ )                            |
| 2 $\theta$ range for data collection/ $^\circ$ | 3.924 to 50                                                      |
| Index ranges                                   | -22 ≤ h ≤ 21, -13 ≤ k ≤ 13, -24 ≤ l ≤ 19                         |
| Reflections collected                          | 25767                                                            |
| Independent reflections                        | 7719 [ $R_{\text{int}} = 0.0947$ , $R_{\text{sigma}} = 0.0922$ ] |
| Data/restraints/parameters                     | 7719/3/487                                                       |
| Goodness-of-fit on F <sup>2</sup>              | 1.054                                                            |
| Final R indexes [ $I > 2\sigma(I)$ ]           | $R_1 = 0.0950$ , $wR_2 = 0.2462$                                 |

|                                             |                                  |
|---------------------------------------------|----------------------------------|
| Final R indexes [all data]                  | $R_1 = 0.1213$ , $wR_2 = 0.2662$ |
| Largest diff. peak/hole / e Å <sup>-3</sup> | 0.56/-0.45                       |

## V. References

- [S1] (a) Liu, G.; Shen, Y.; Zhou, Z.; Lu, X. *Angew. Chem. Int. Ed.*, **2013**, *52*, 6033. (b) Li, B.; Lan, J.; Wu, D.; You, J. *Angew. Chem. Int. Ed.*, **2015**, *54*, 14008. (c) Wu, Y.; Chen, Z.; Yang, Y.; Zhu, W.; Zhou, B. *J. Am. Chem. Soc.* **2018**, *140*, 42.
- [S2] (a) Phipps, E. J. T.; Rovis, T. *J. Am. Chem. Soc.* **2019**, *141*, 6807. (b) Duchemin, C.; Cramer, N. *Org. Chem. Front.* **2019**, *6*, 209.
- [S3] Tata, R. R.; Hampton, C. S.; Harmata, M. *Adv. Synth. Catal.* **2017**, *359*, 1232.

## VI. Copies of $^1\text{H}$ , $^{13}\text{C}$ and $^{19}\text{F}$ NMR spectra

### 3aa- $^1\text{H}$ NMR (400 MHz, $\text{CDCl}_3$ )

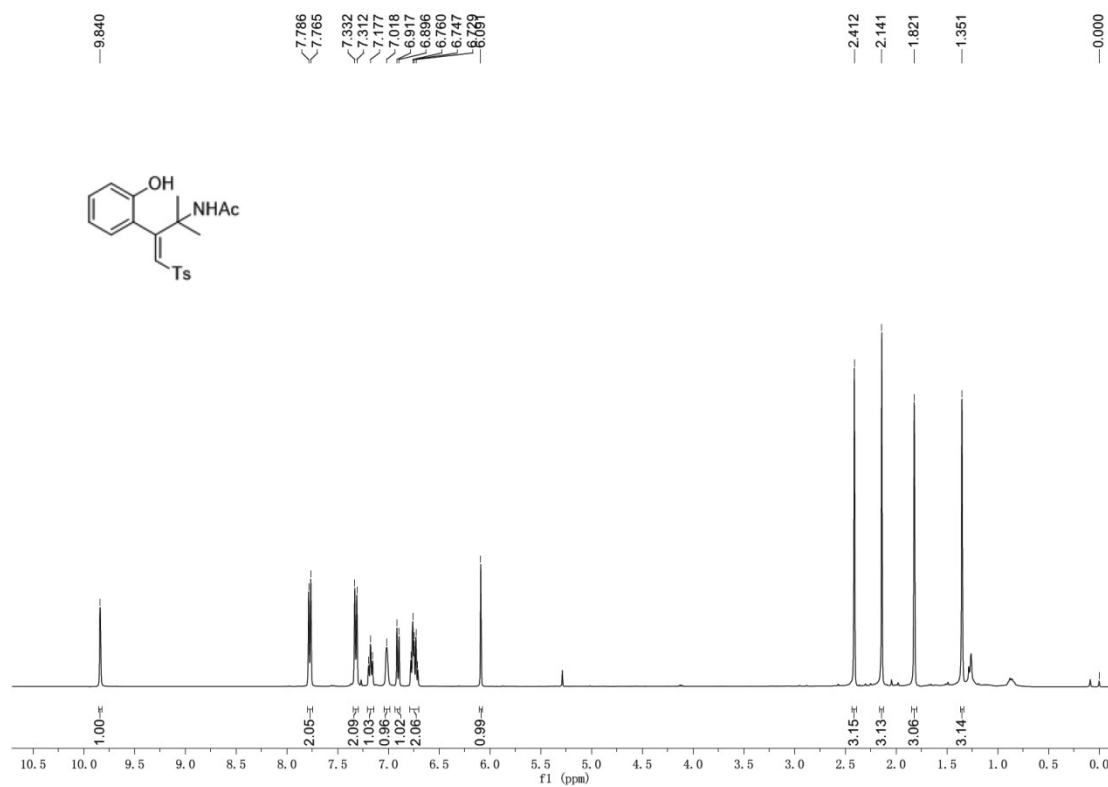

### 3aa- $^{13}\text{C}$ NMR (100 MHz, $\text{CDCl}_3$ )

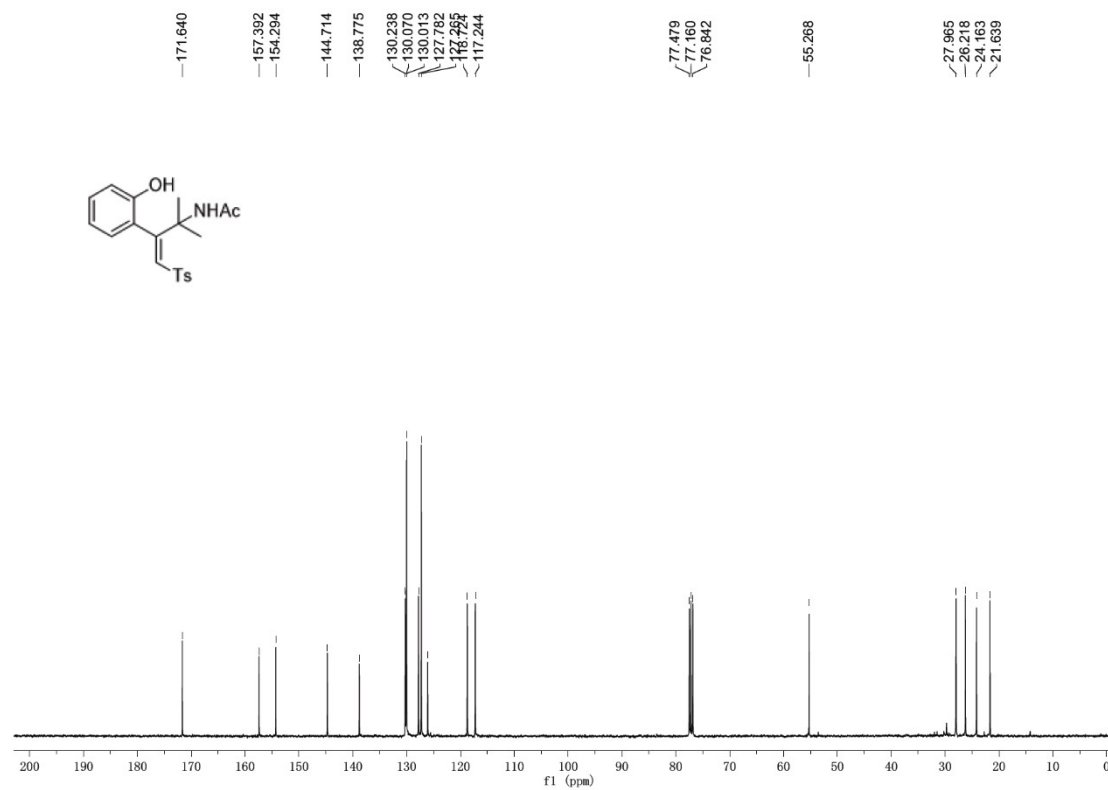

### 3ba-<sup>1</sup>H NMR (400 MHz, CDCl<sub>3</sub>)

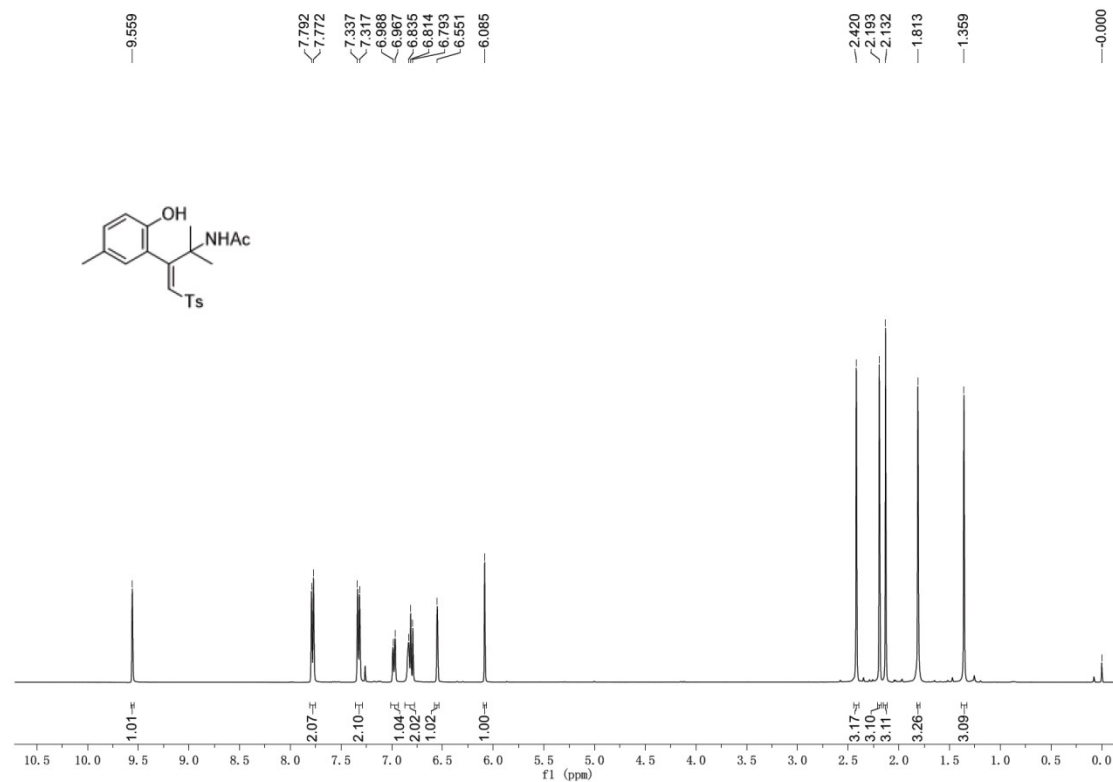

### 3ba-<sup>13</sup>C NMR (100 MHz, CDCl<sub>3</sub>)

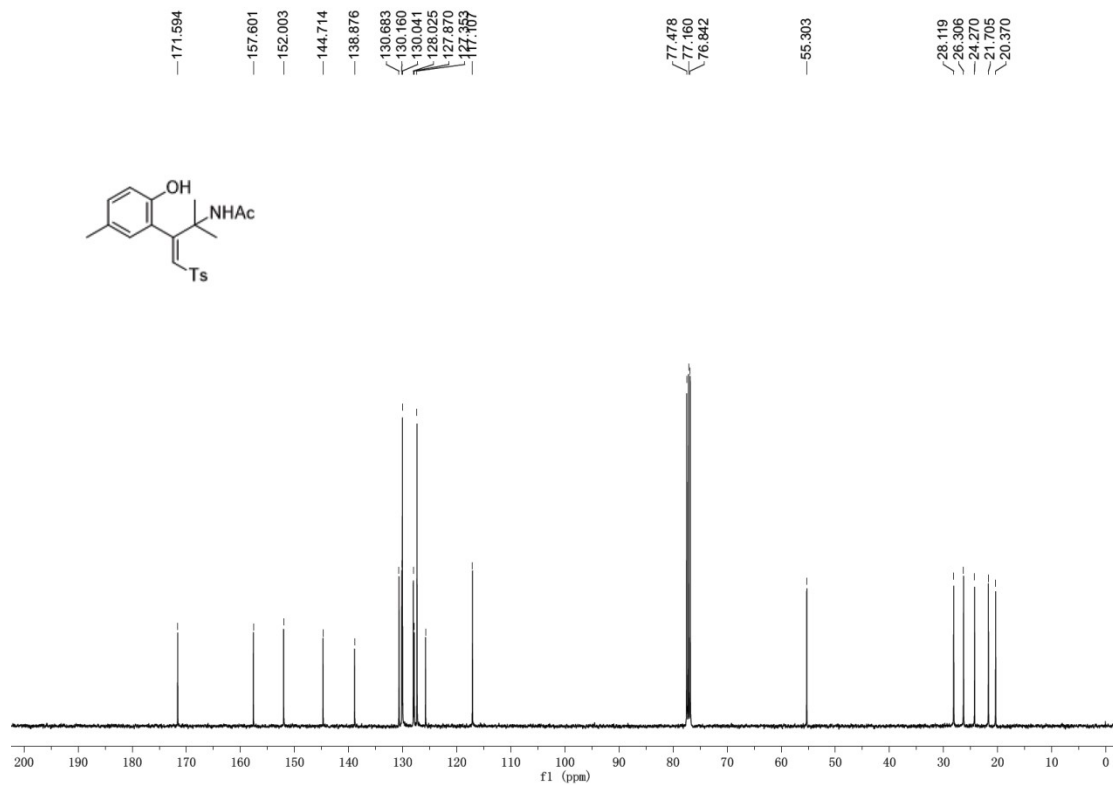

**3ca**-<sup>1</sup>H NMR (400 MHz, CDCl<sub>3</sub>)

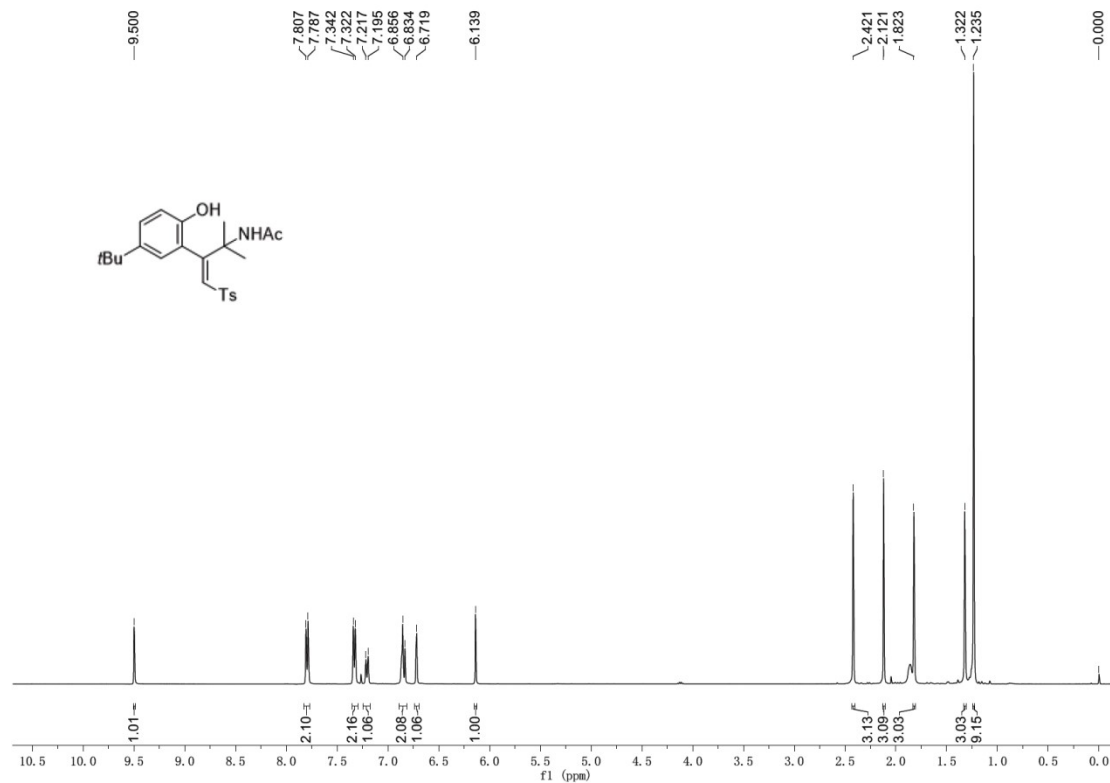

**3ca**-<sup>13</sup>C NMR (100 MHz, CDCl<sub>3</sub>)

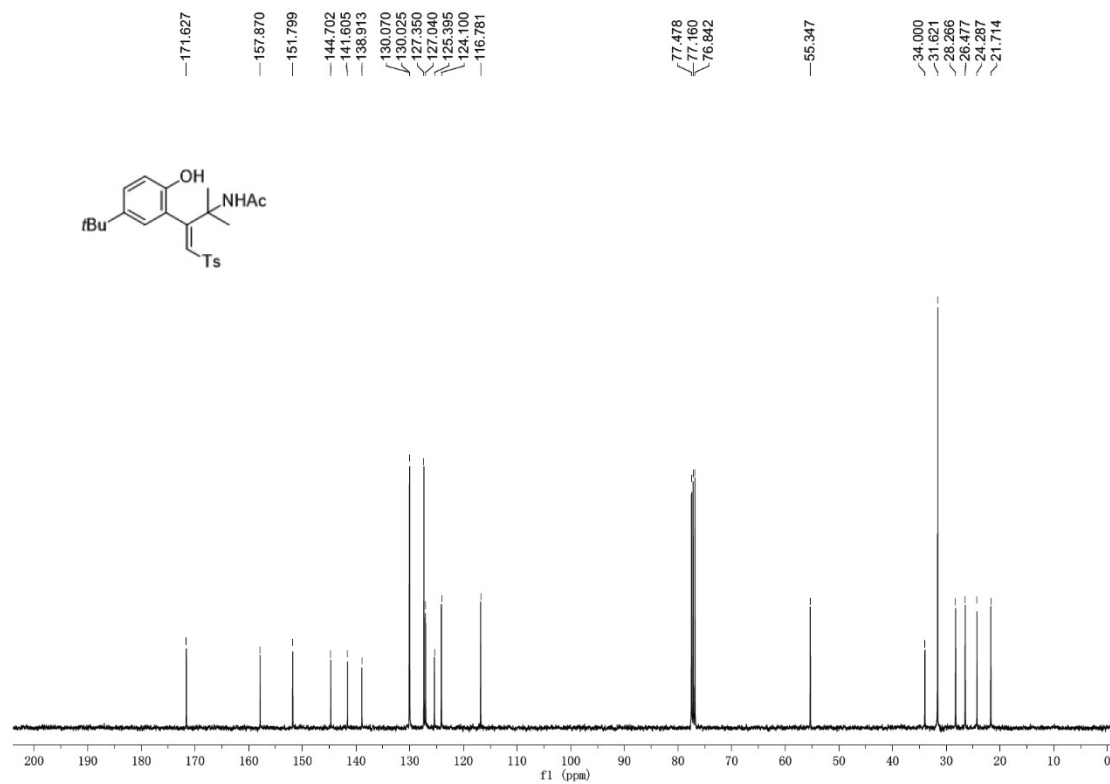

**3da-<sup>1</sup>H NMR (400 MHz, CDCl<sub>3</sub>)**

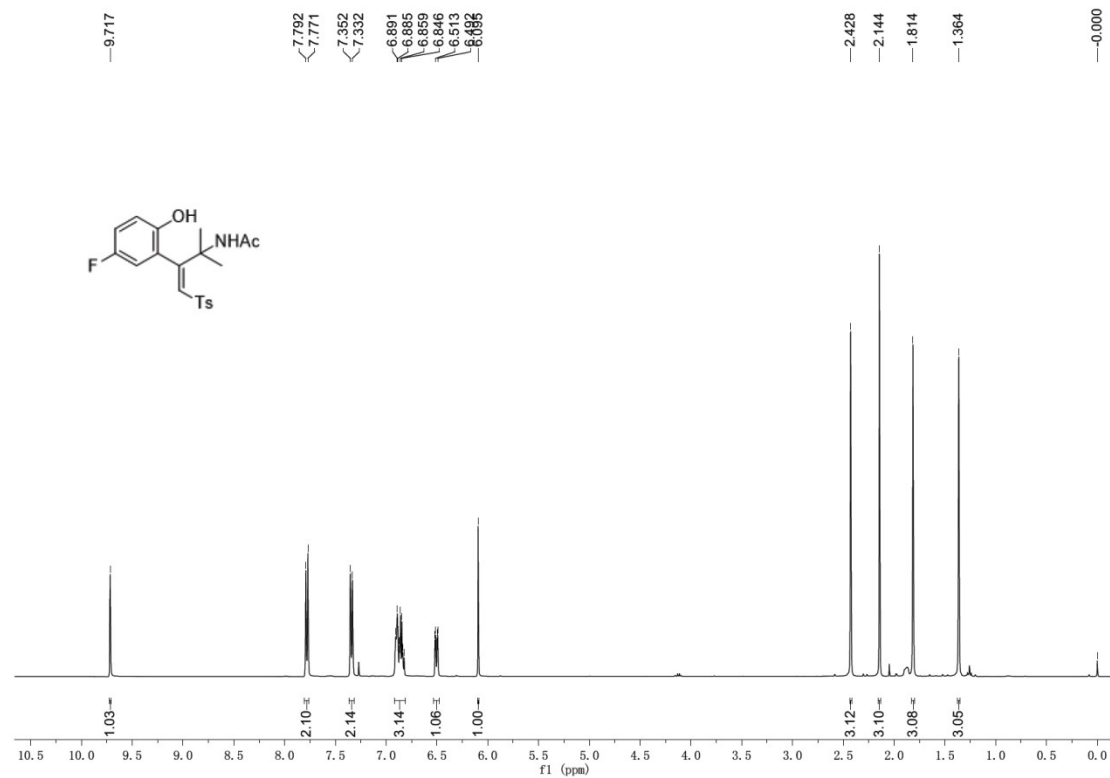

**3da-<sup>13</sup>C NMR (100 MHz, CDCl<sub>3</sub>)**

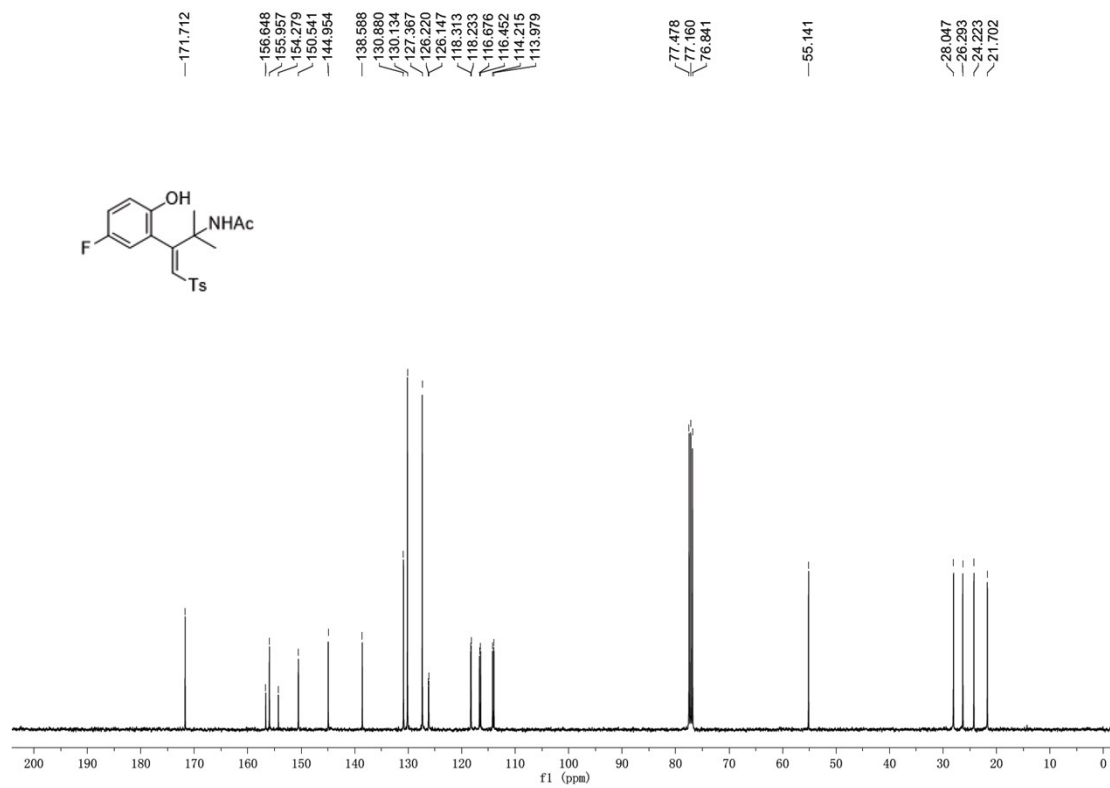



**3da**-<sup>19</sup>F NMR (376 MHz, CDCl<sub>3</sub>)

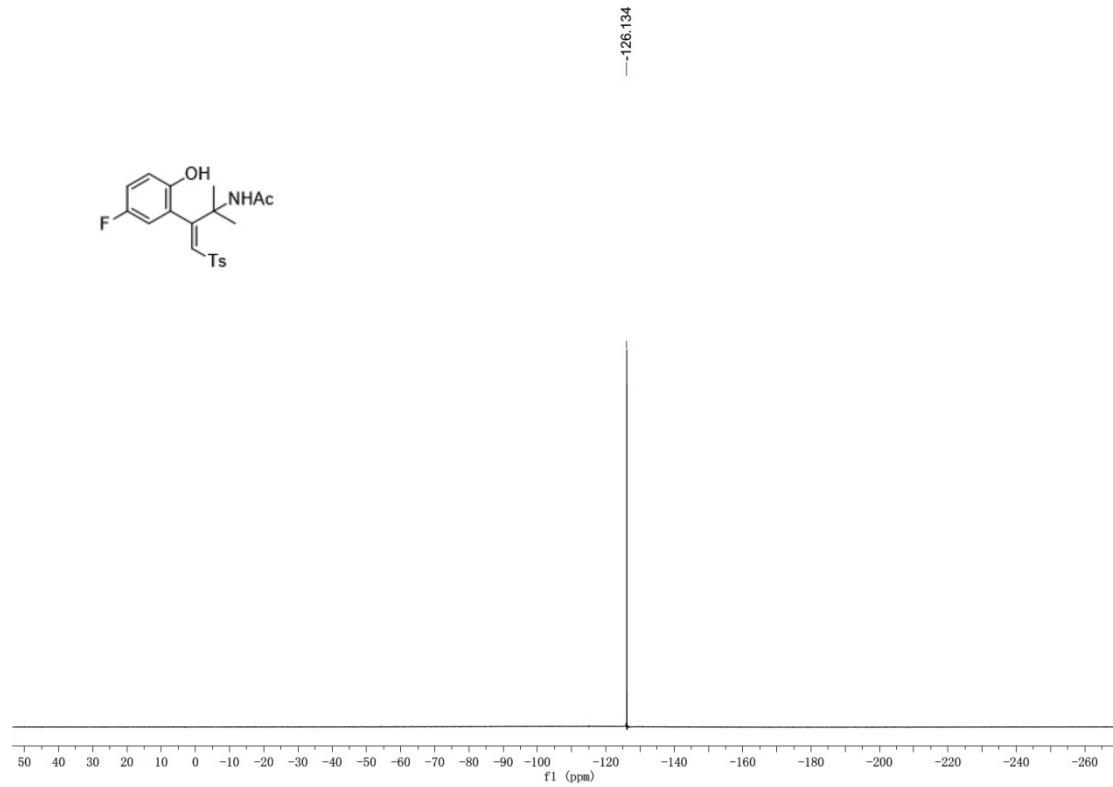

**3ea-<sup>1</sup>H NMR (400 MHz, CDCl<sub>3</sub>)**

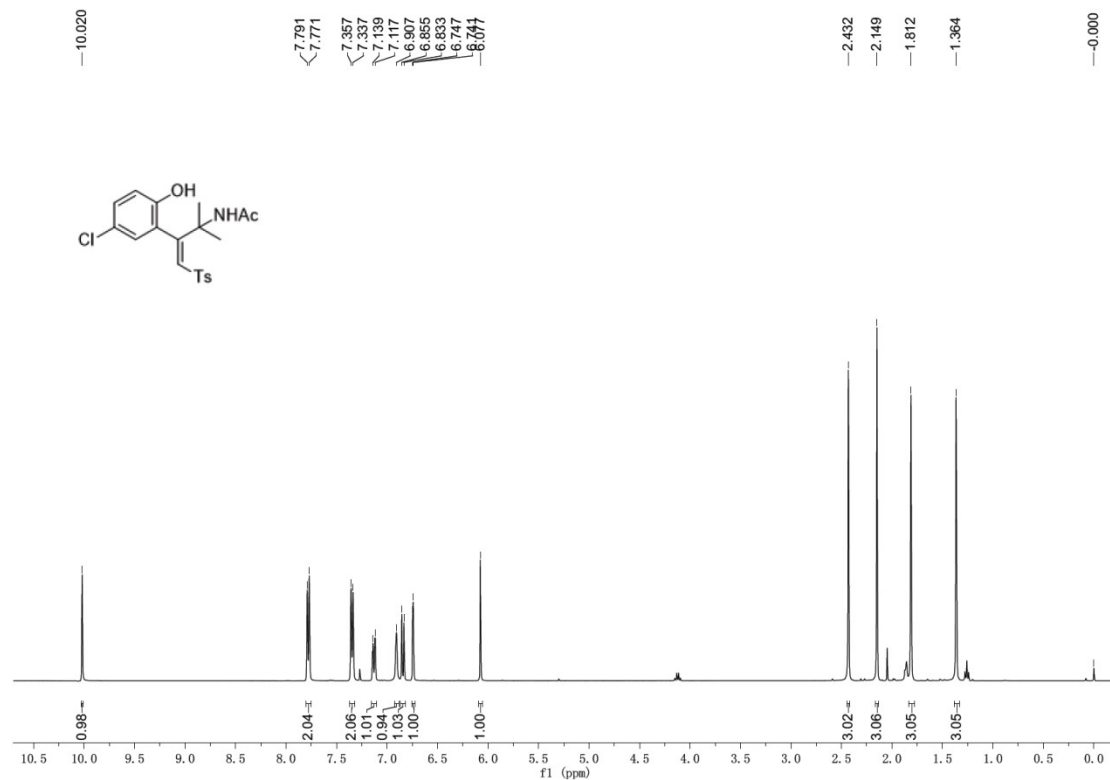

**3ea-<sup>13</sup>C NMR (100 MHz, CDCl<sub>3</sub>)**

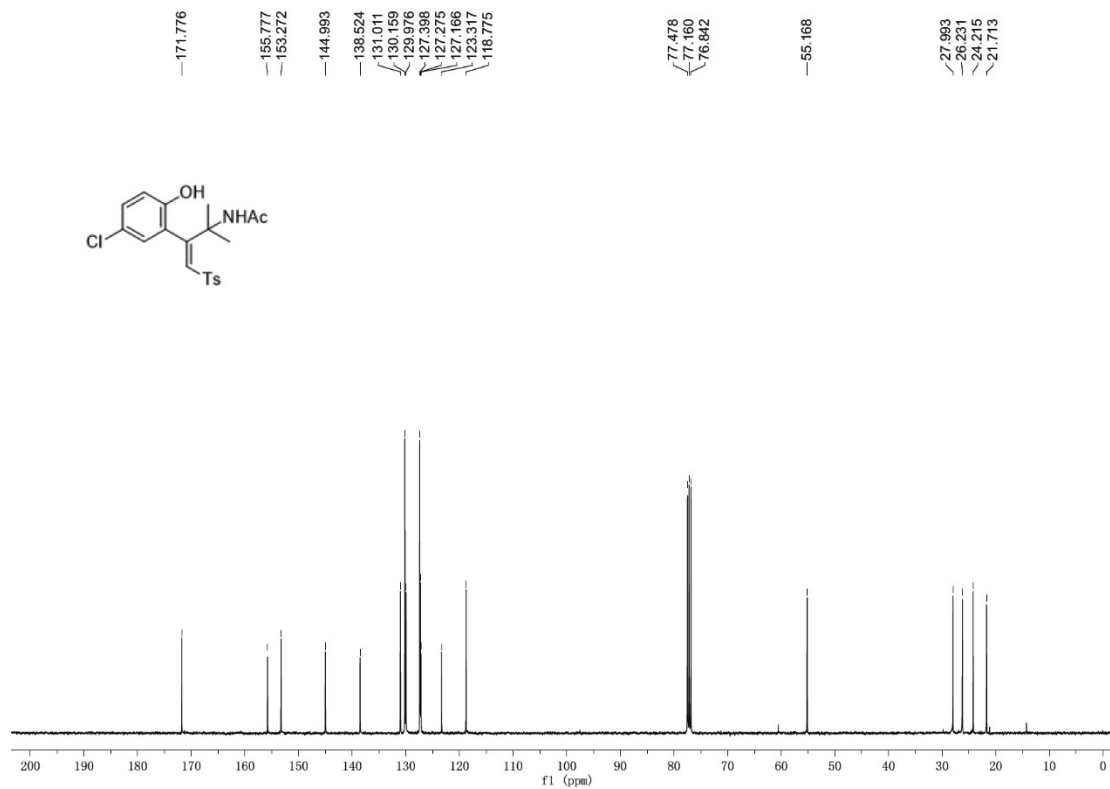

**3fa**-<sup>1</sup>H NMR (400 MHz, CDCl<sub>3</sub>)

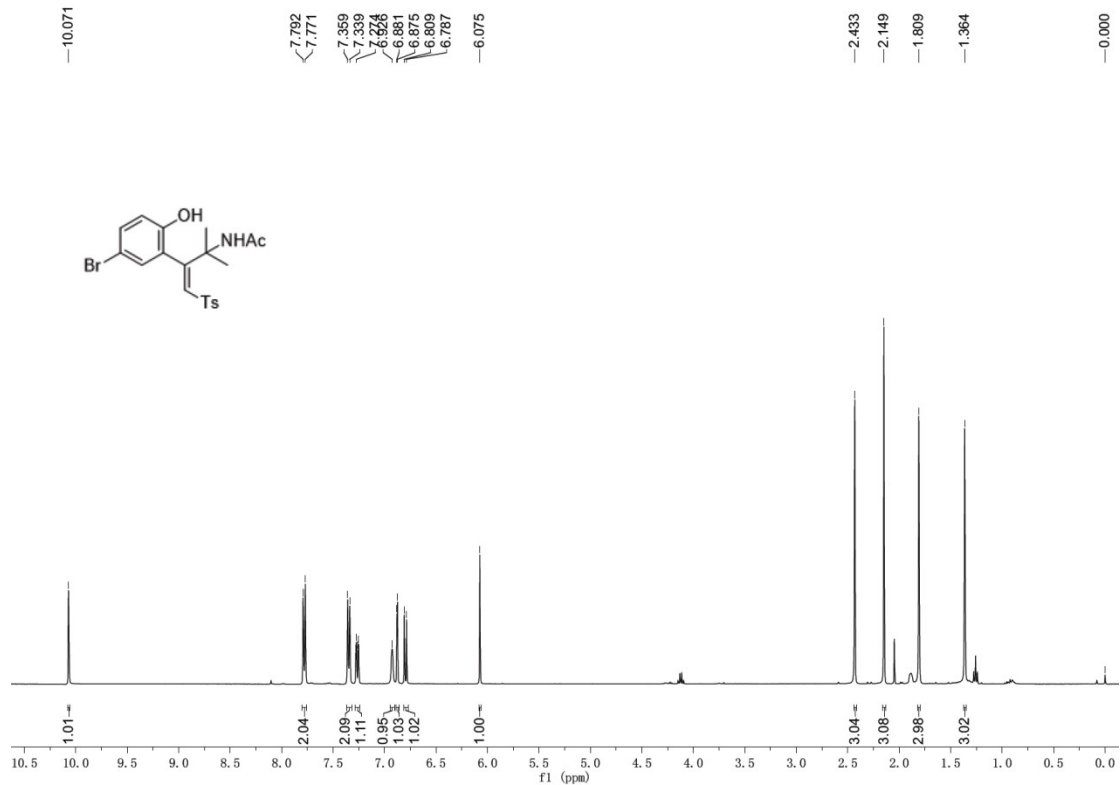

**3fa**-<sup>13</sup>C NMR (100 MHz, CDCl<sub>3</sub>)

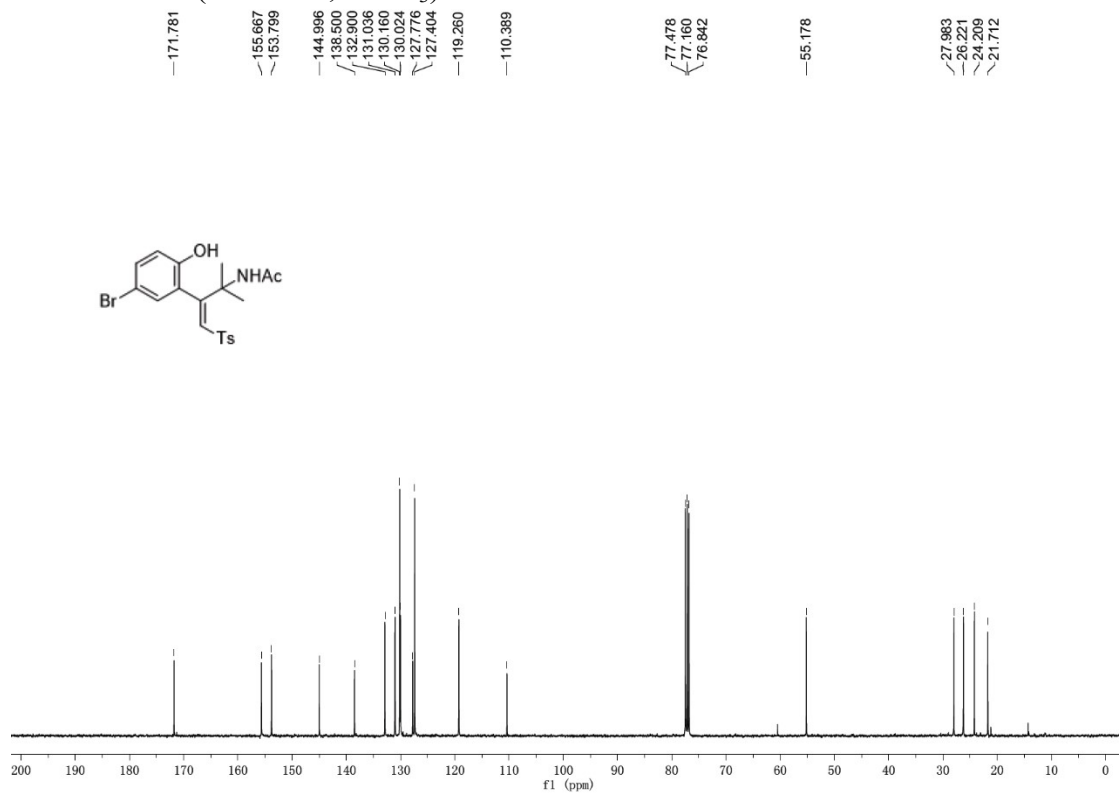

**3ga-<sup>1</sup>H NMR (400 MHz, CDCl<sub>3</sub>)**

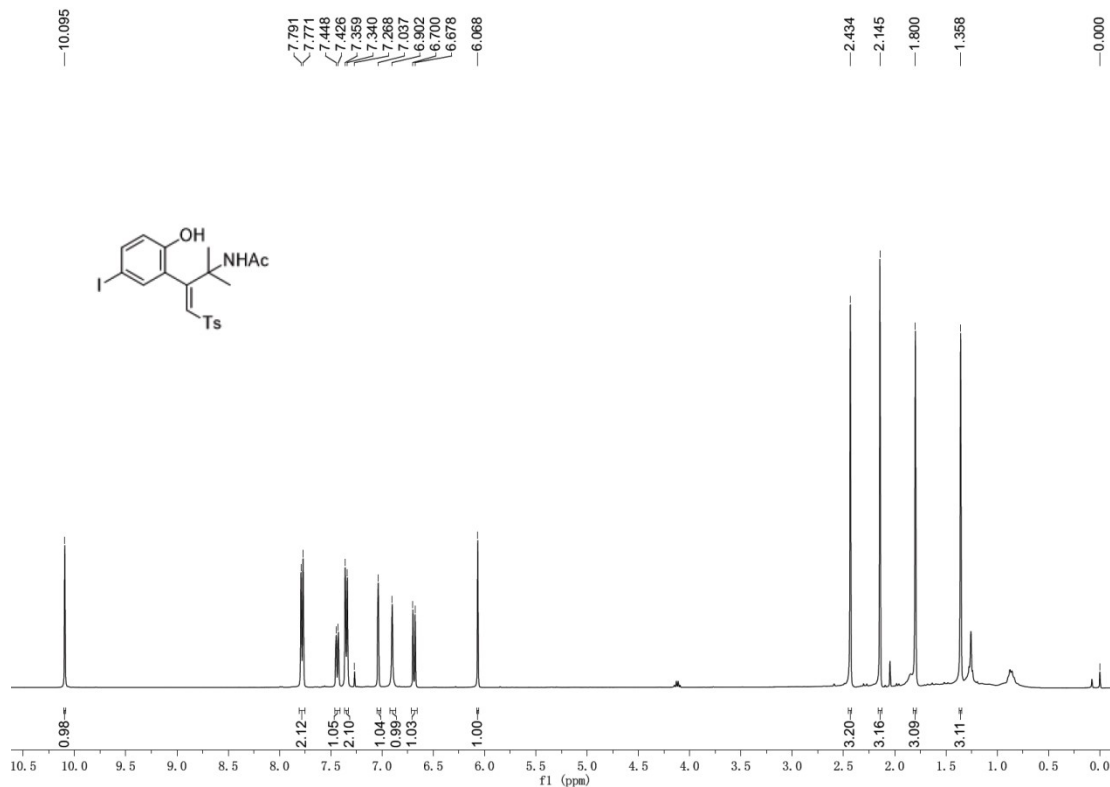

**3ga-<sup>13</sup>C NMR (100 MHz, CDCl<sub>3</sub>)**

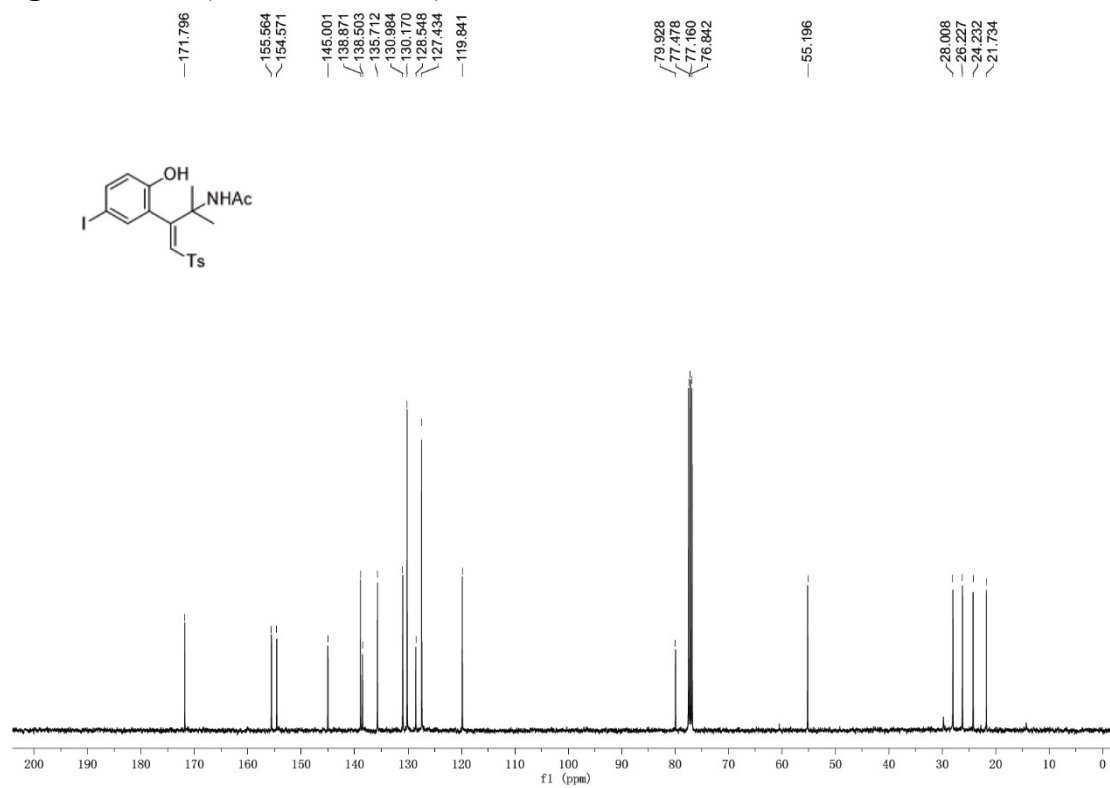

### 3ha-<sup>1</sup>H NMR (400 MHz, CDCl<sub>3</sub>)

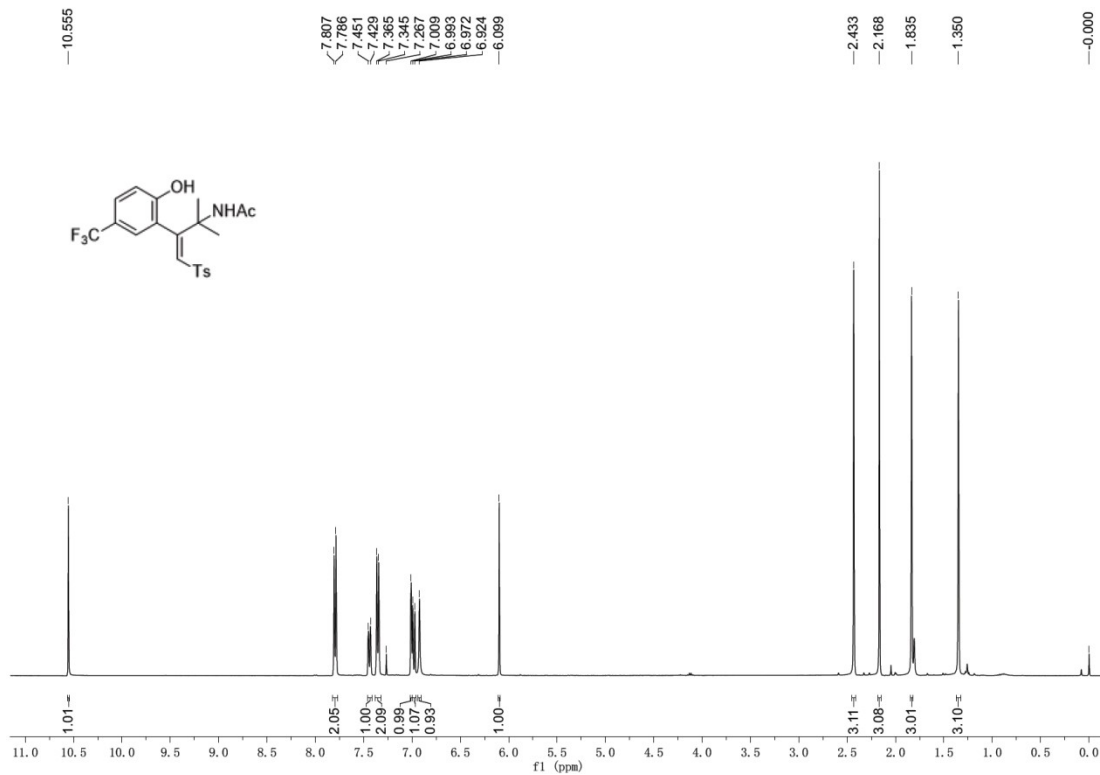

### 3ha-<sup>13</sup>C NMR (100 MHz, CDCl<sub>3</sub>)

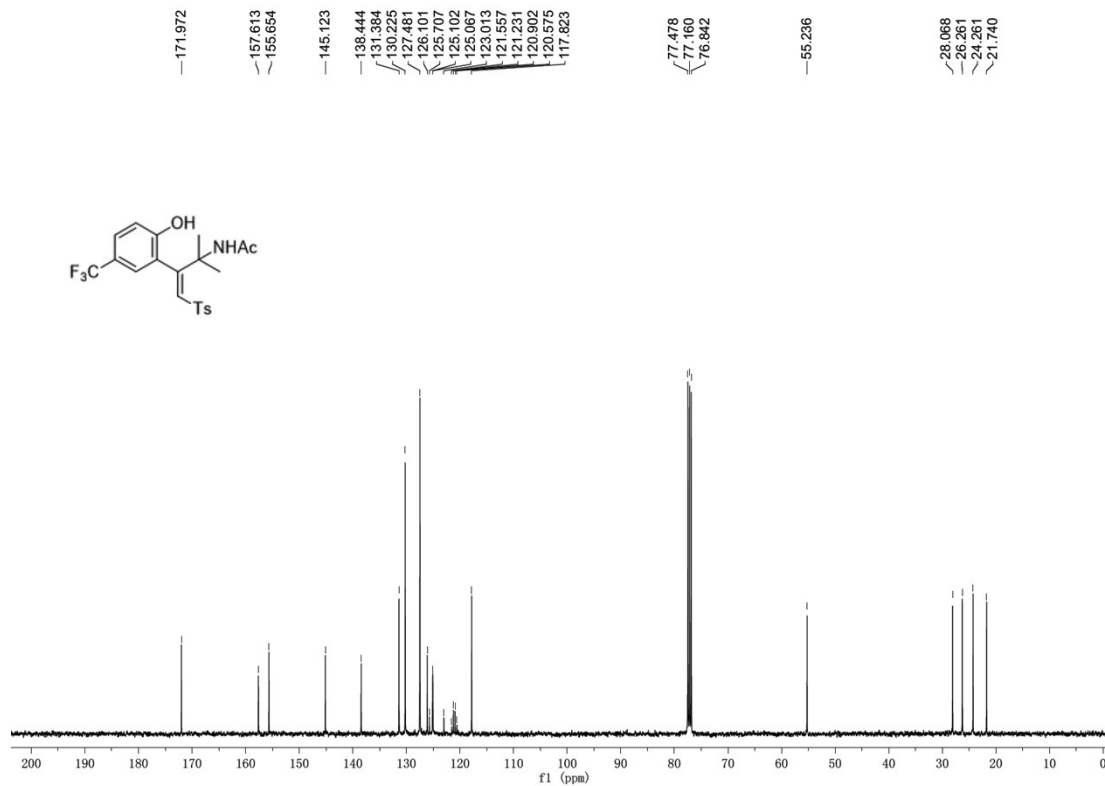

**3ha**-<sup>19</sup>F NMR (376 MHz, CDCl<sub>3</sub>)

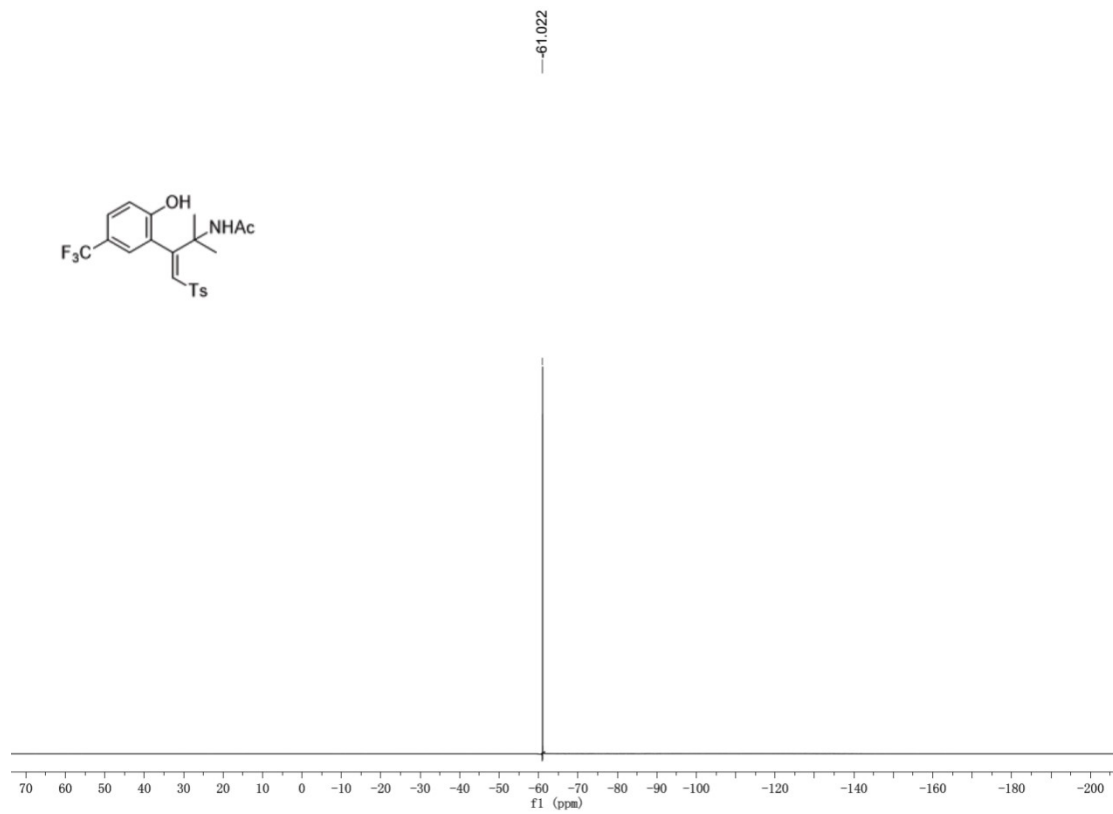

### 3ia-<sup>1</sup>H NMR (400 MHz, CDCl<sub>3</sub>)

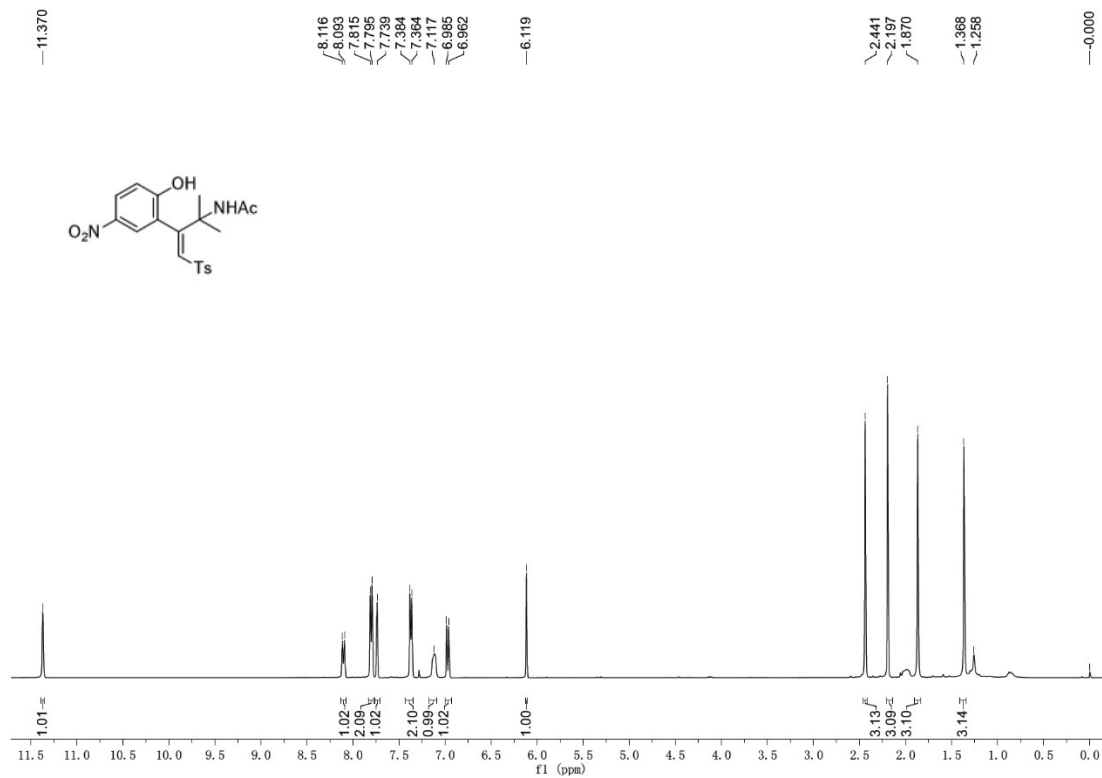

### 3ia-<sup>13</sup>C NMR (100 MHz, CDCl<sub>3</sub>)

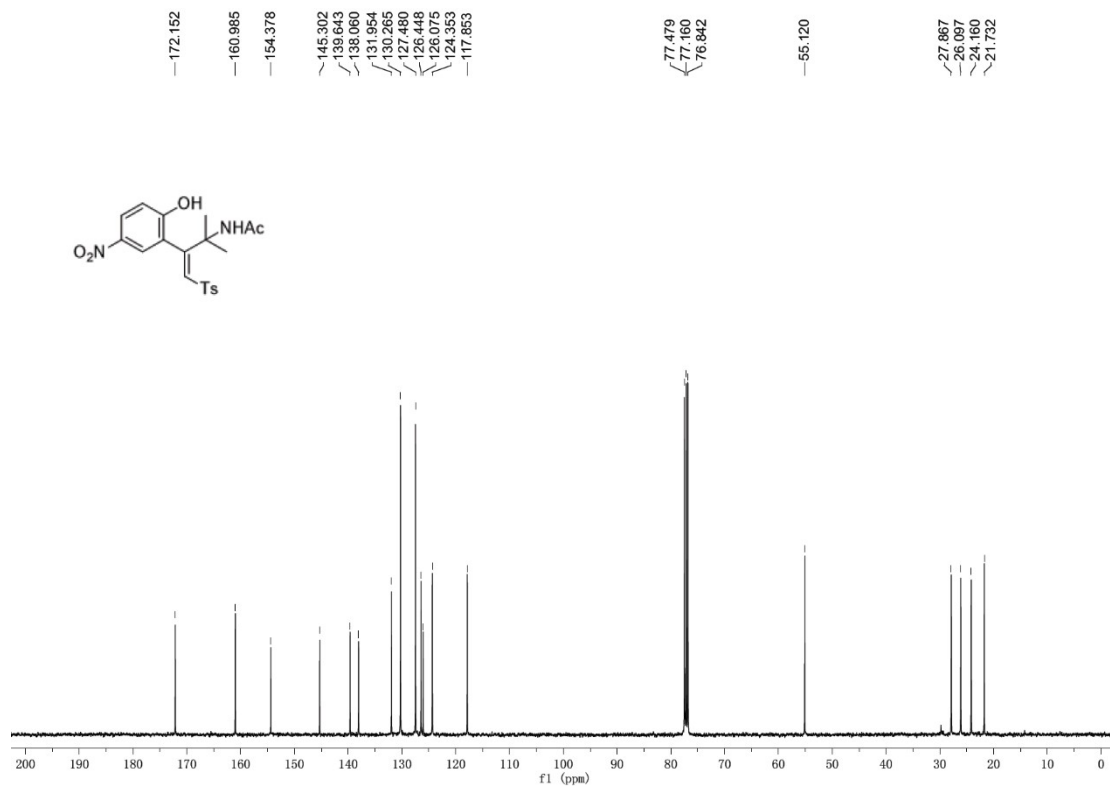

**3ja**-<sup>1</sup>H NMR (400 MHz, CDCl<sub>3</sub>)

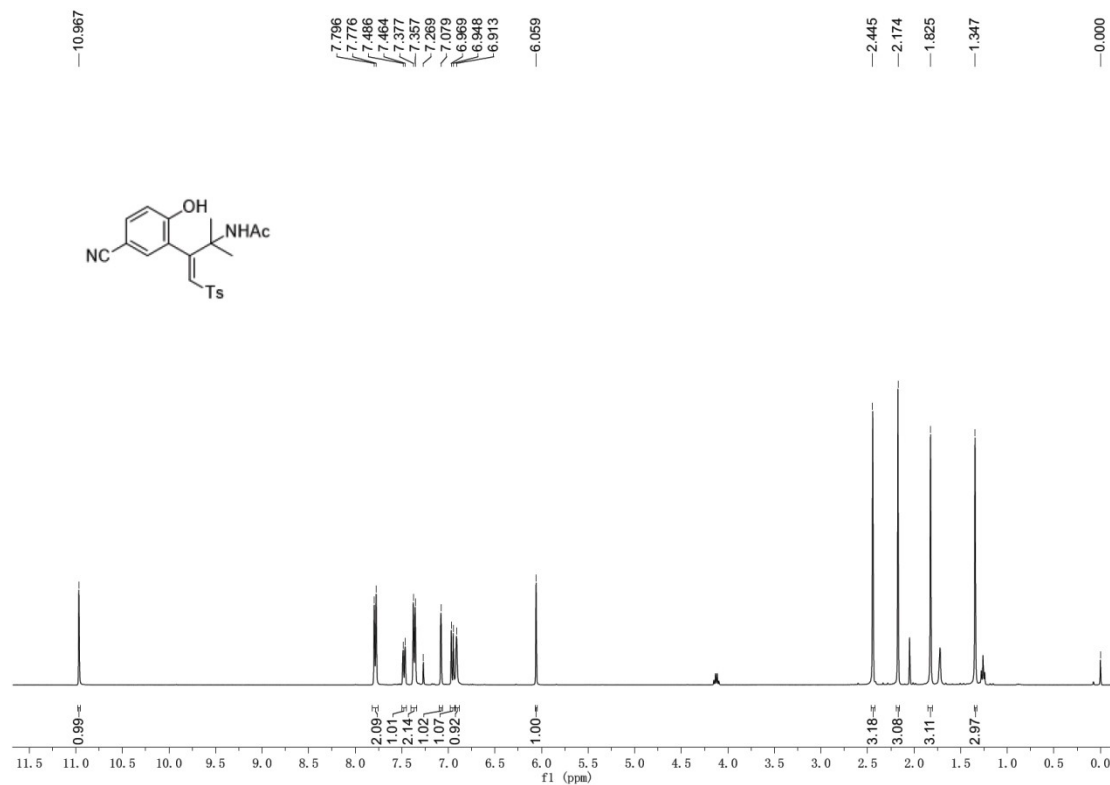

**3ja**-<sup>13</sup>C NMR (100 MHz, CDCl<sub>3</sub>)

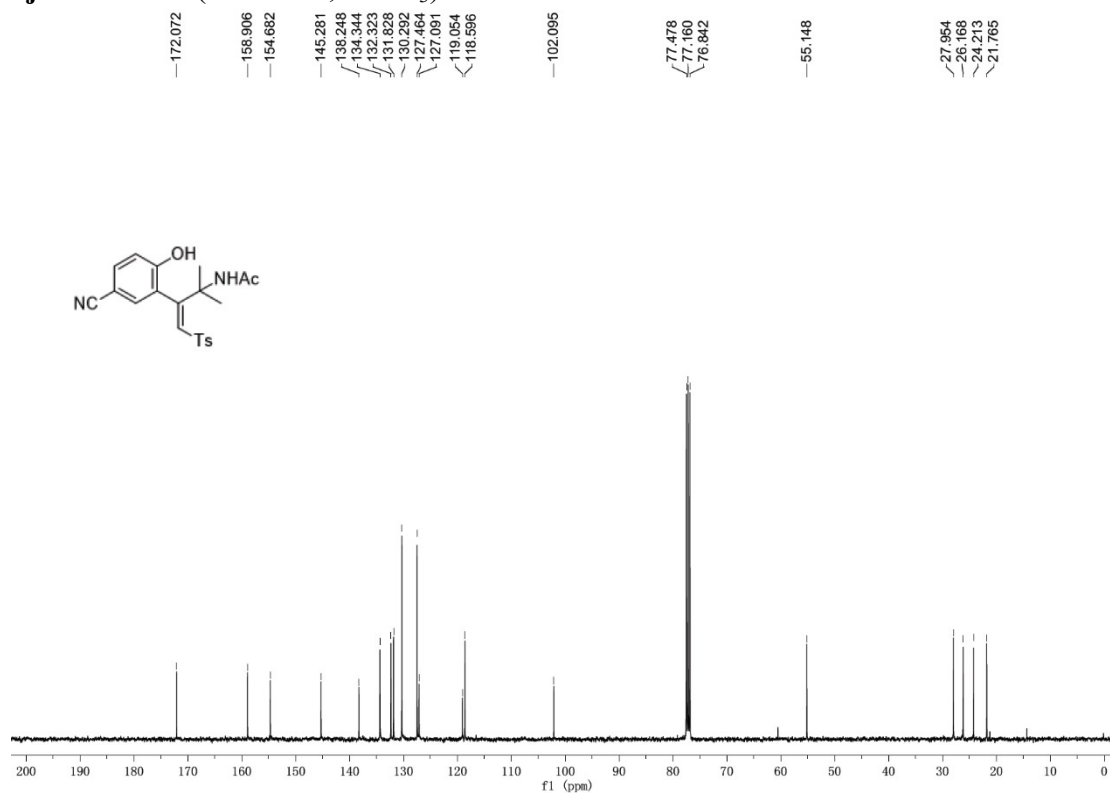



### 3ka-<sup>1</sup>H NMR (400 MHz, CDCl<sub>3</sub>)

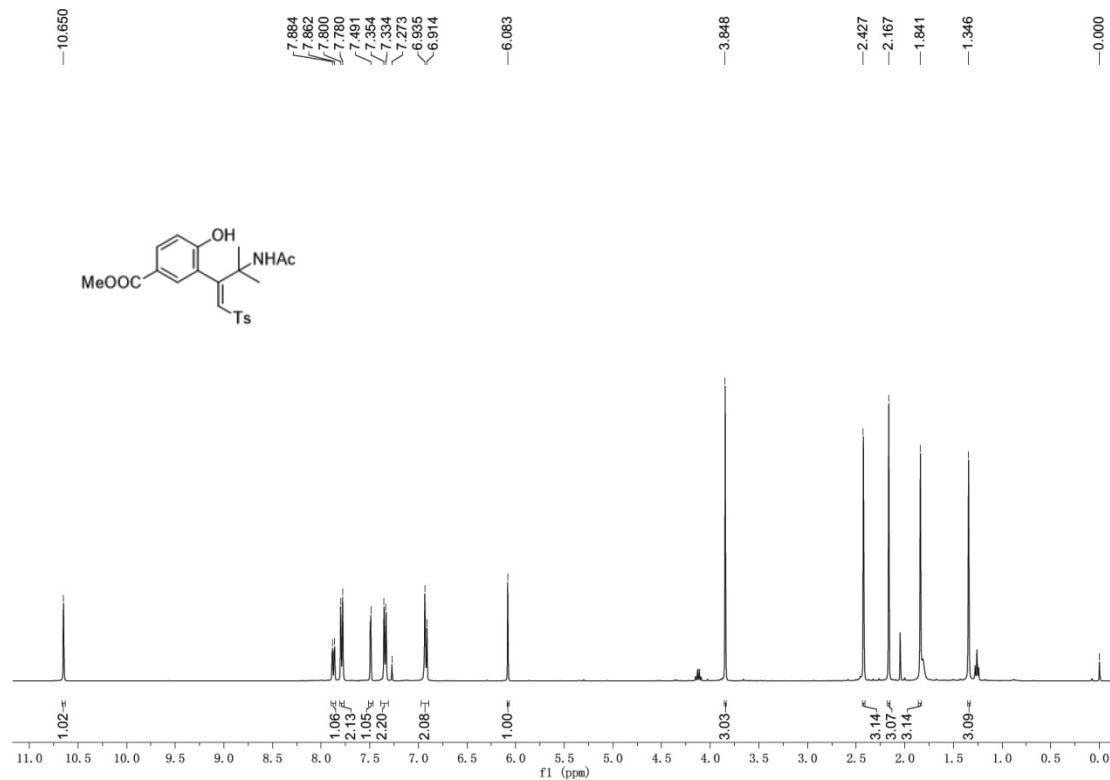

### 3ka-<sup>13</sup>C NMR (100 MHz, CDCl<sub>3</sub>)

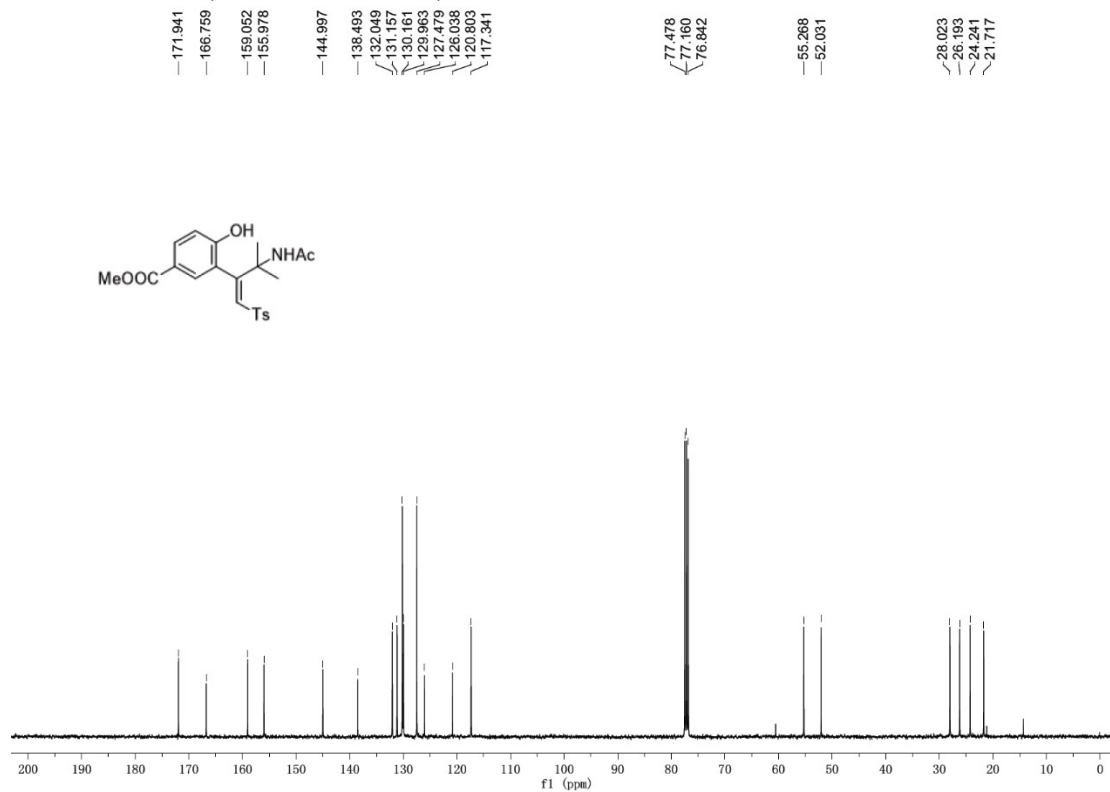

### 3la-<sup>1</sup>H NMR (400 MHz, CDCl<sub>3</sub>)

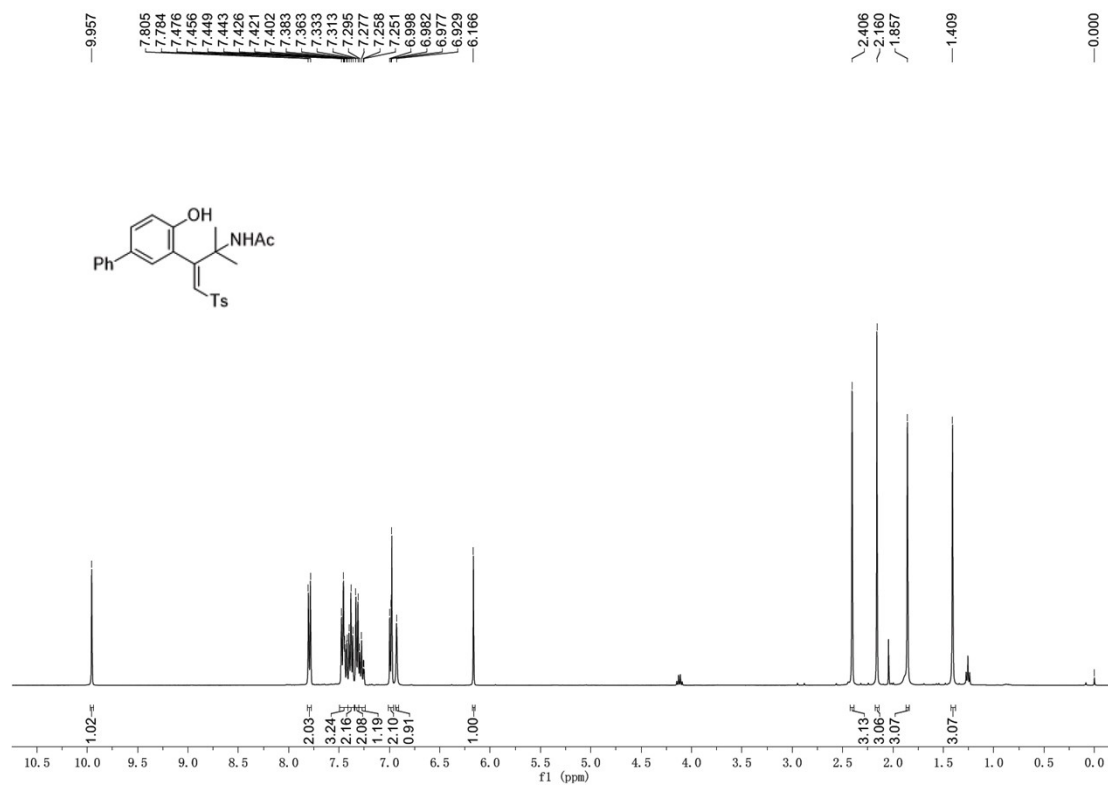

### 3la-<sup>13</sup>C NMR (100 MHz, CDCl<sub>3</sub>)

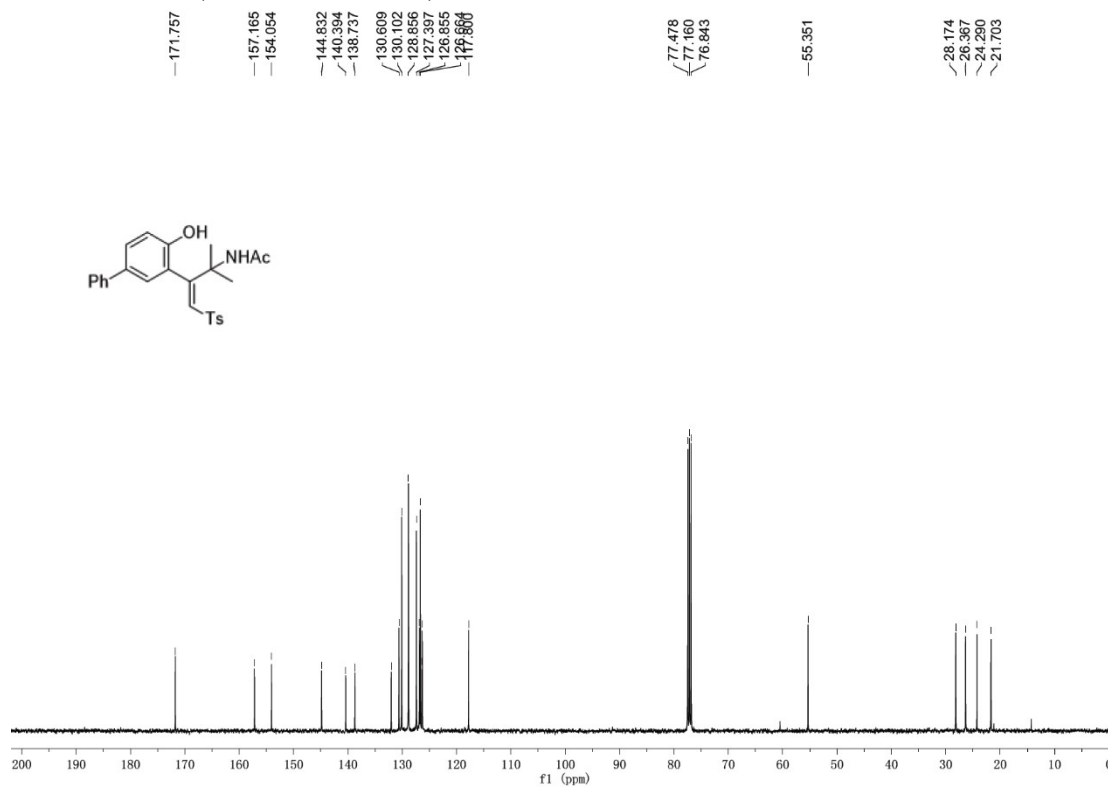

**3ma-<sup>1</sup>H NMR (400 MHz, CDCl<sub>3</sub>)**

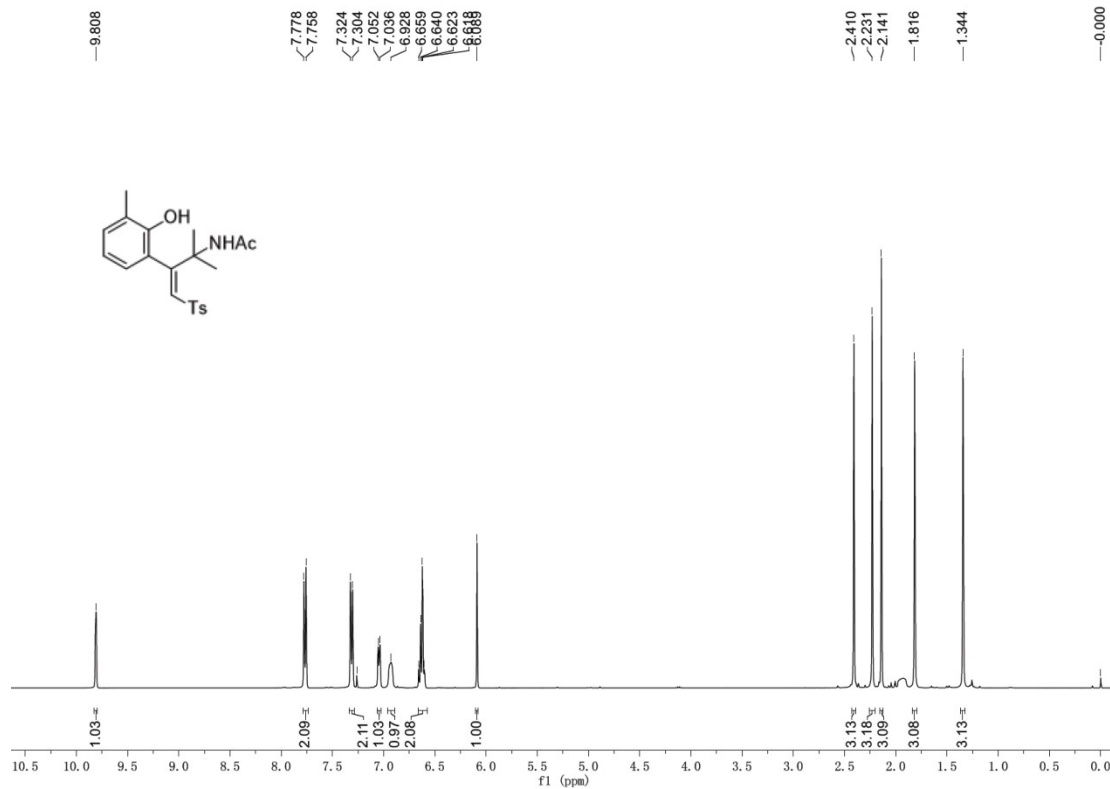

**3ma-<sup>13</sup>C NMR (100 MHz, CDCl<sub>3</sub>)**

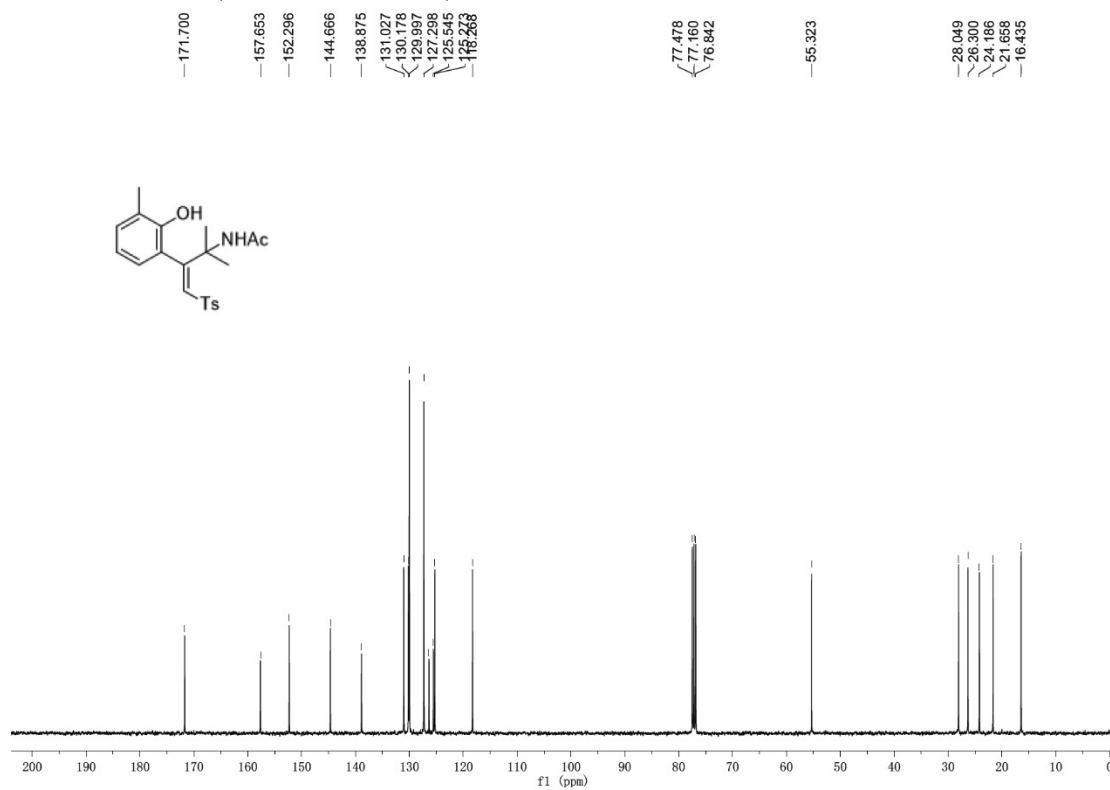

**3na/3na'** -<sup>1</sup>H NMR (400 MHz, CDCl<sub>3</sub>)

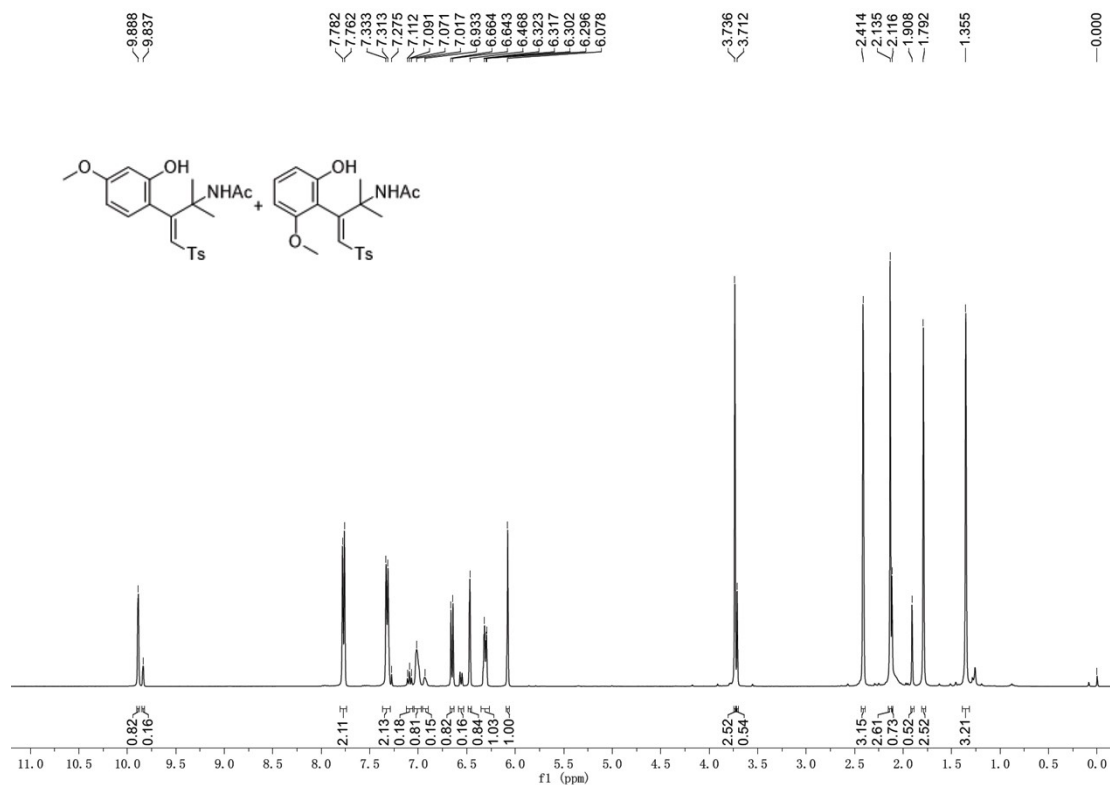

**3na/3na'** -<sup>13</sup>C NMR (100 MHz, CDCl<sub>3</sub>)

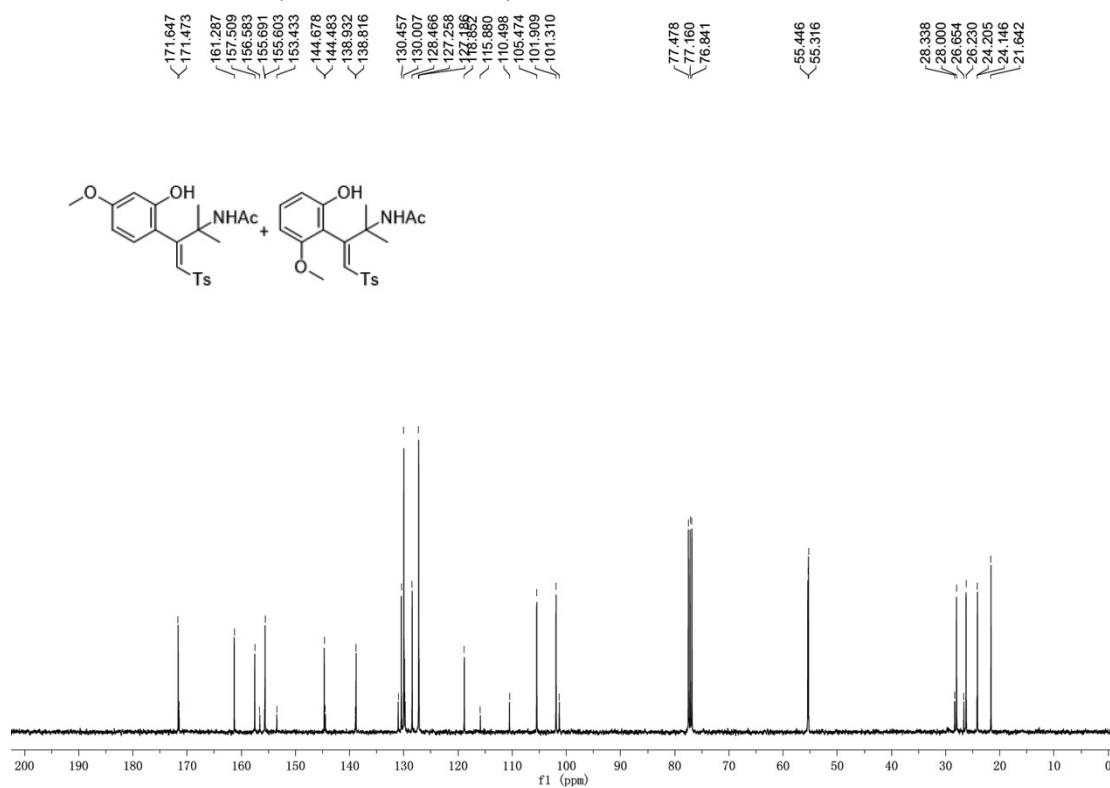

**30a-<sup>1</sup>H NMR (400 MHz, CDCl<sub>3</sub>)**

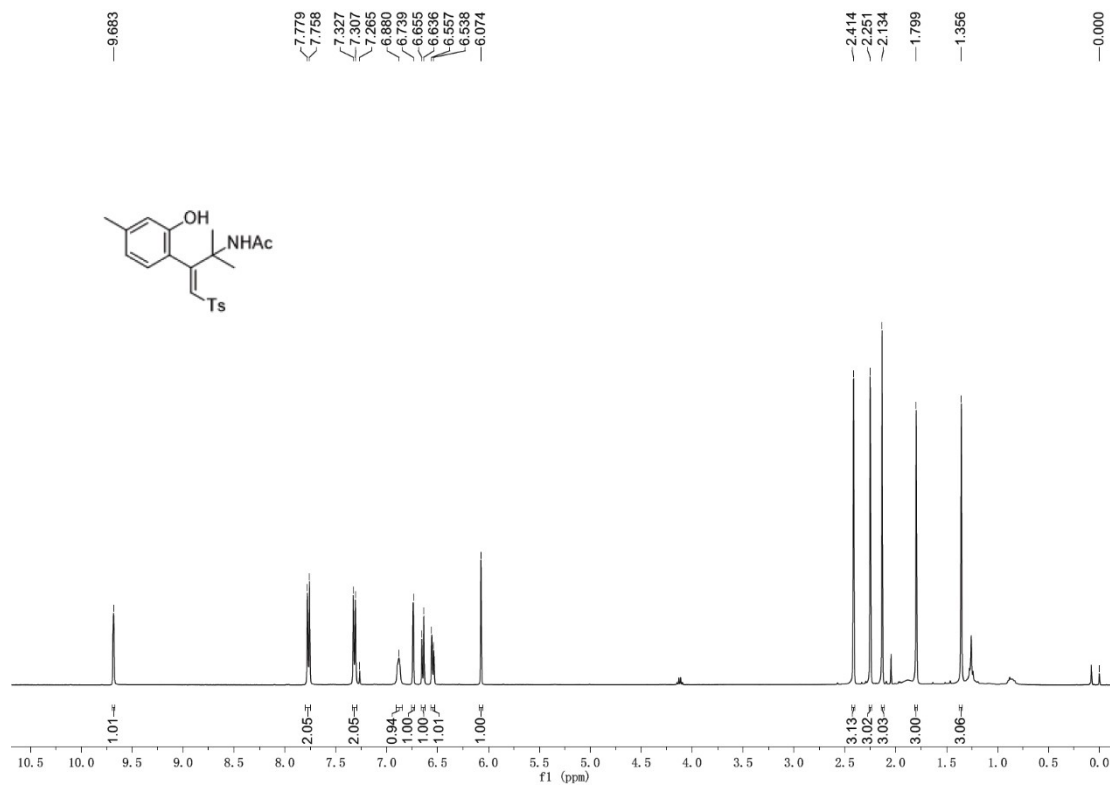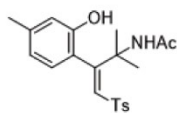

**30a-<sup>13</sup>C NMR (100 MHz, CDCl<sub>3</sub>)**

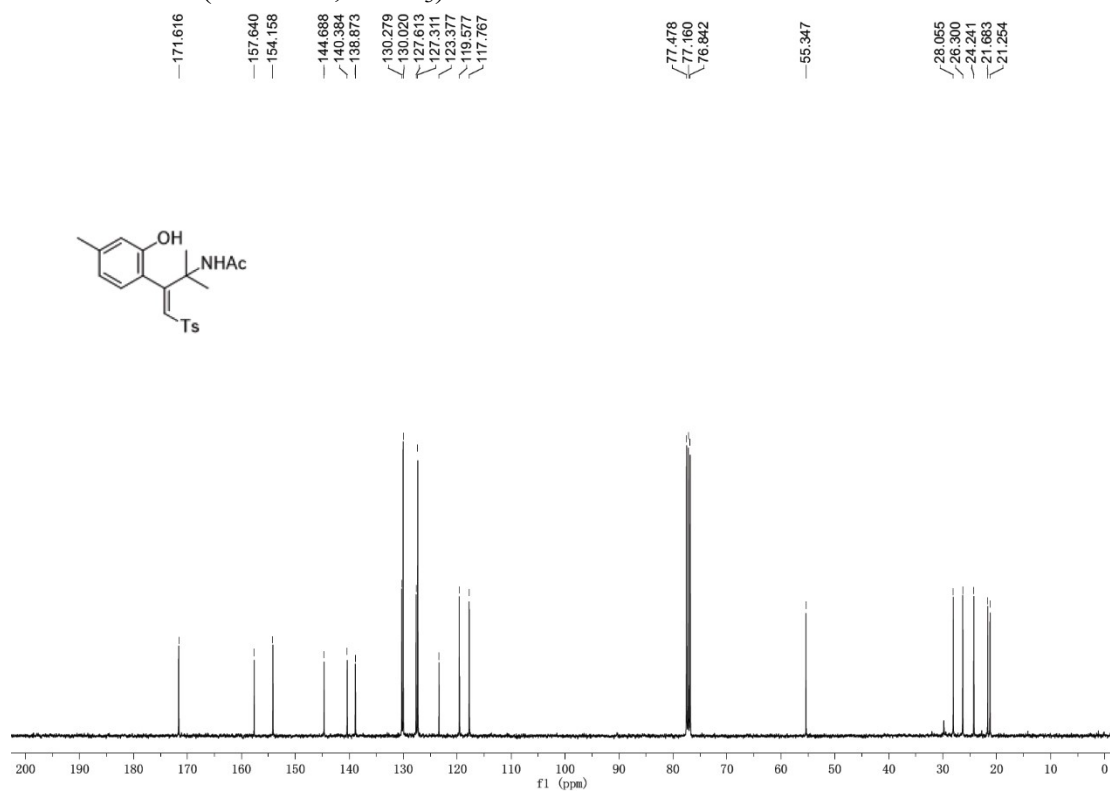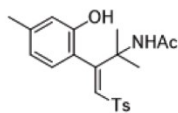

**3pa-<sup>1</sup>H NMR (400 MHz, CDCl<sub>3</sub>)**

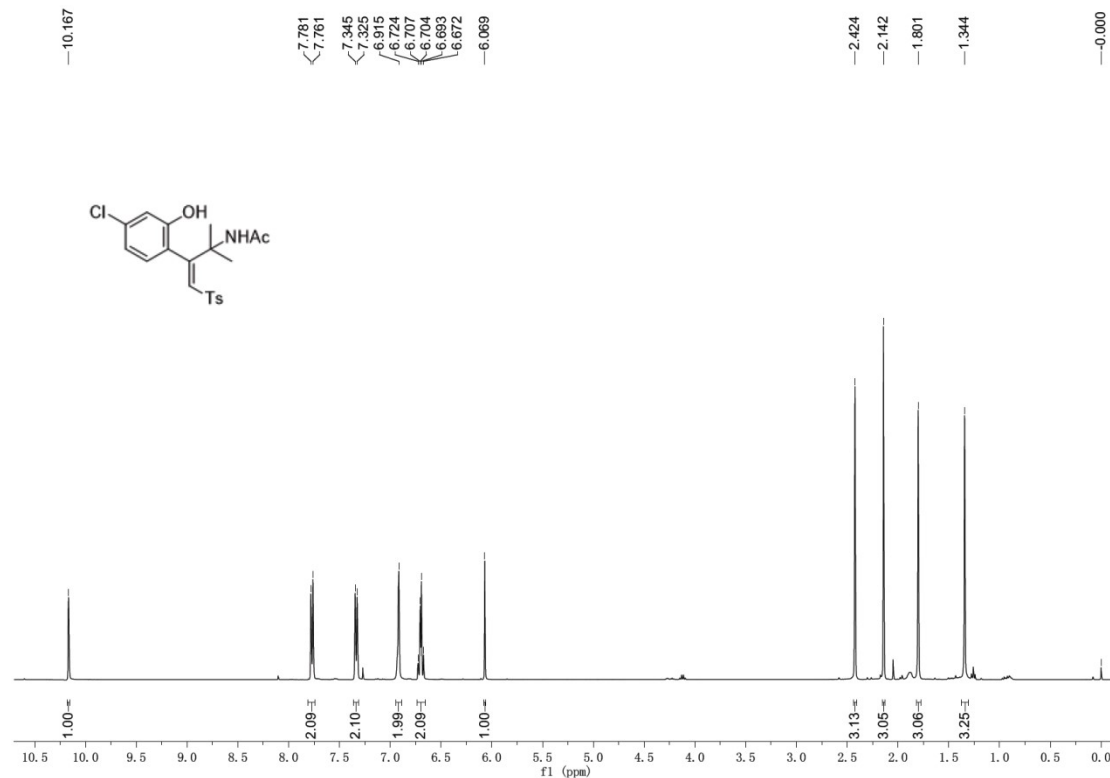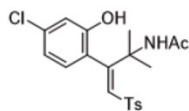

**3pa-<sup>13</sup>C NMR (100 MHz, CDCl<sub>3</sub>)**

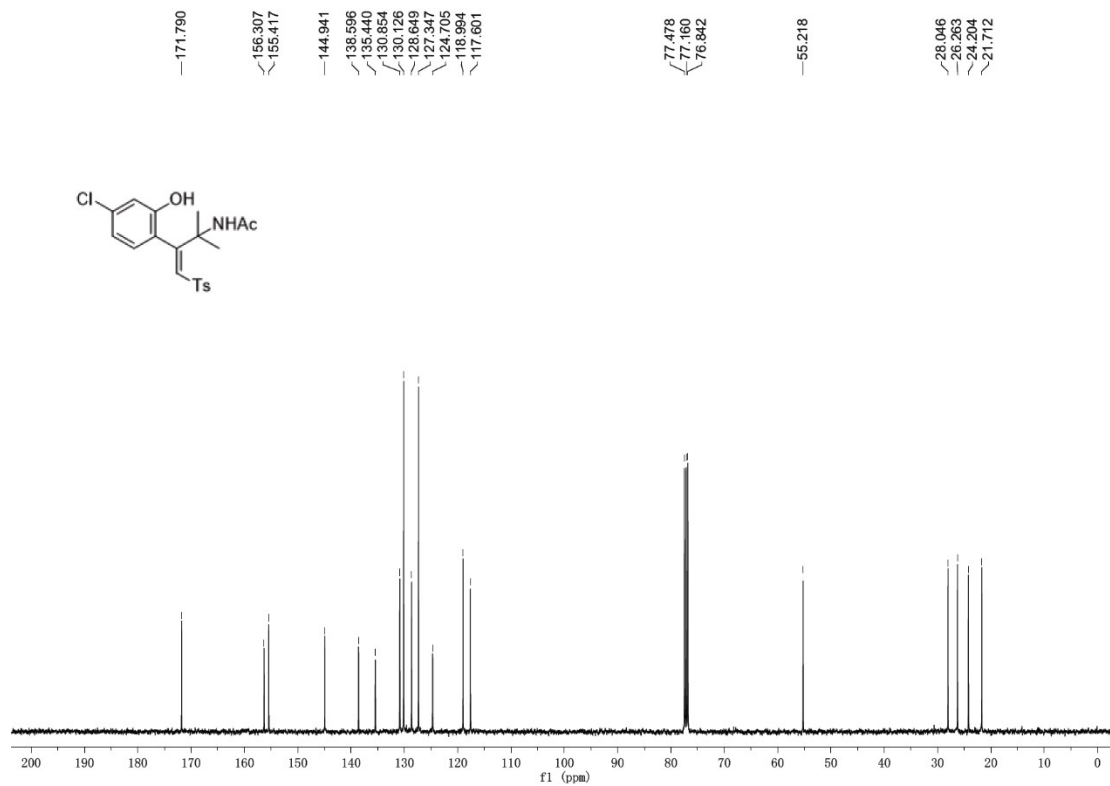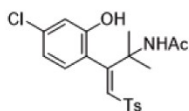

**3qa-<sup>1</sup>H NMR (400 MHz, CDCl<sub>3</sub>)**

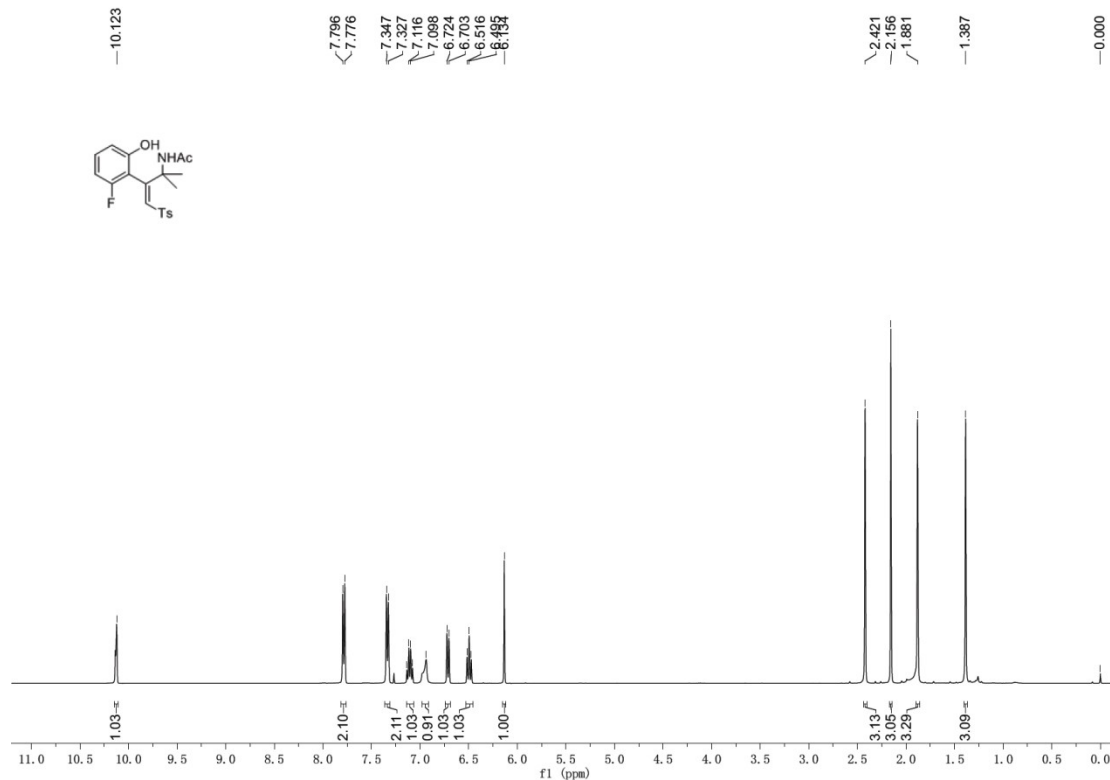

**3qa-<sup>13</sup>C NMR (100 MHz, CDCl<sub>3</sub>)**

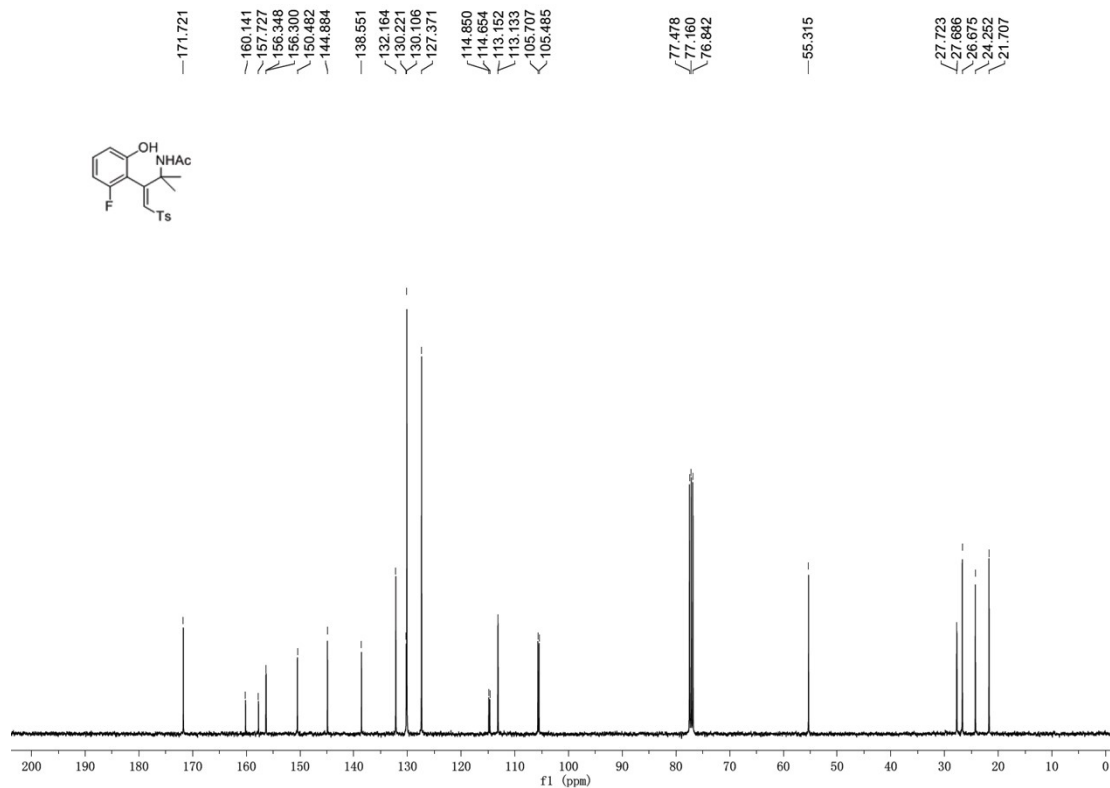

**3qa**-<sup>19</sup>F NMR (376 MHz, CDCl<sub>3</sub>)

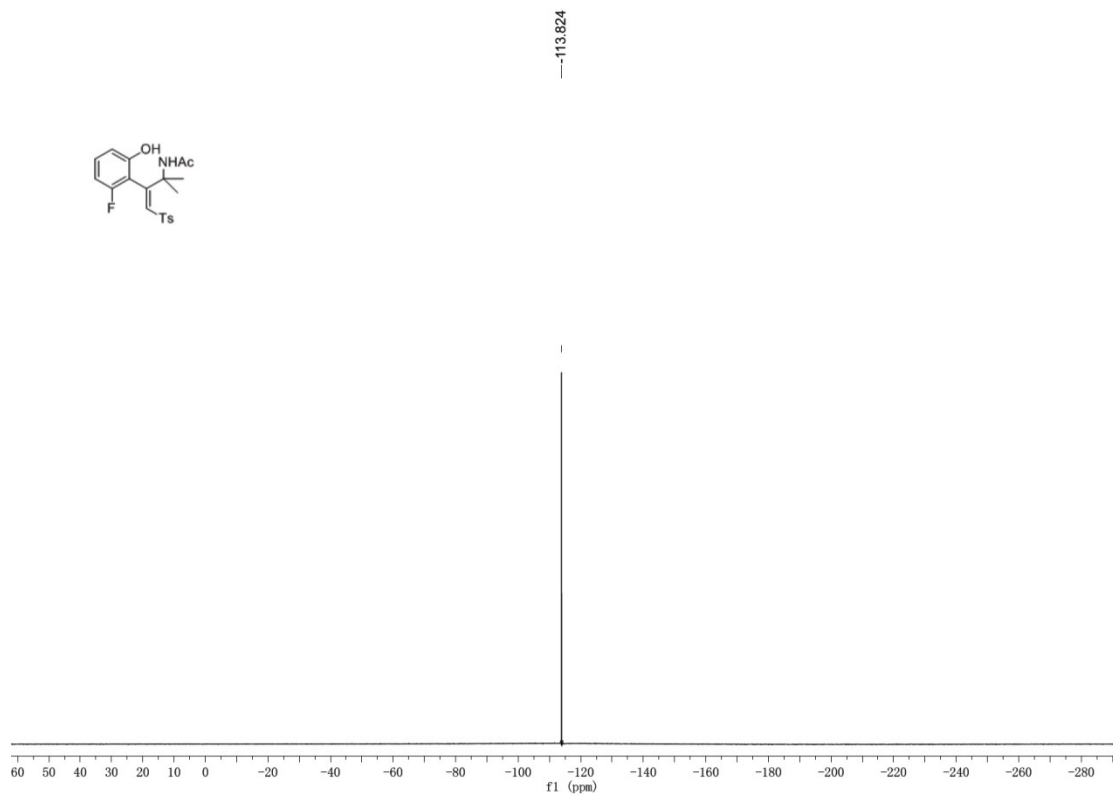



**3ra-<sup>1</sup>H NMR (400 MHz, CDCl<sub>3</sub>)**

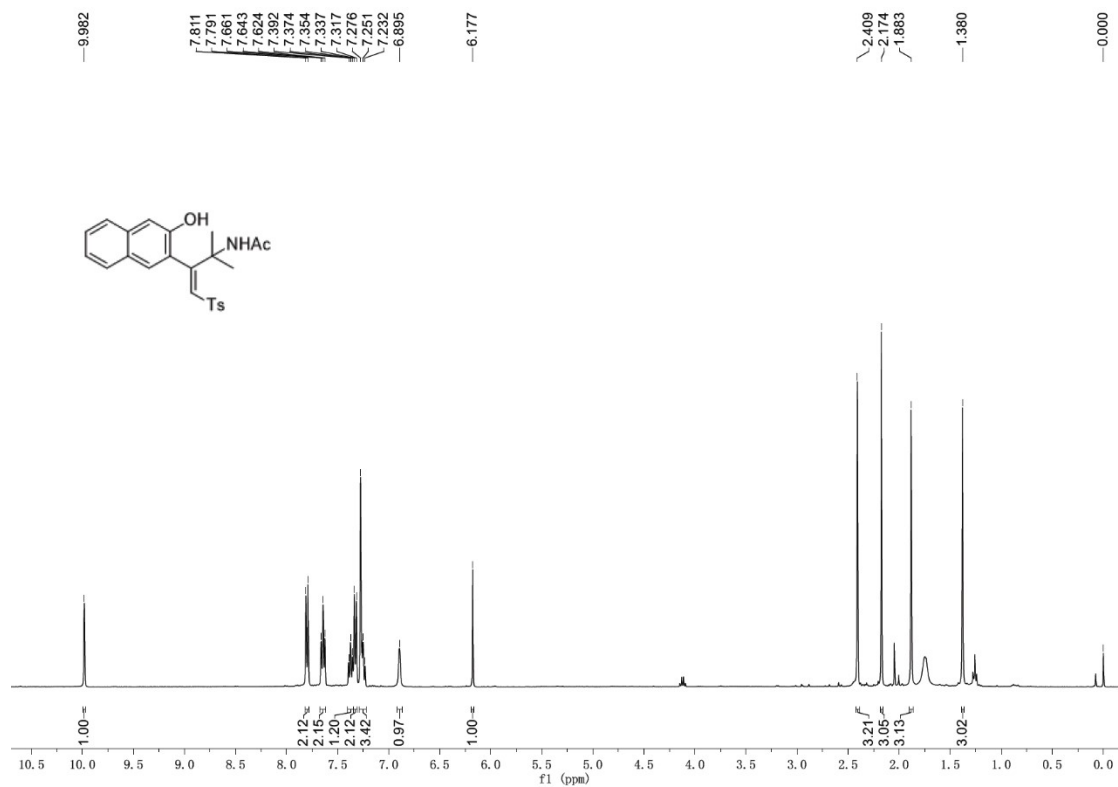

**3ra-<sup>13</sup>C NMR (100 MHz, CDCl<sub>3</sub>)**

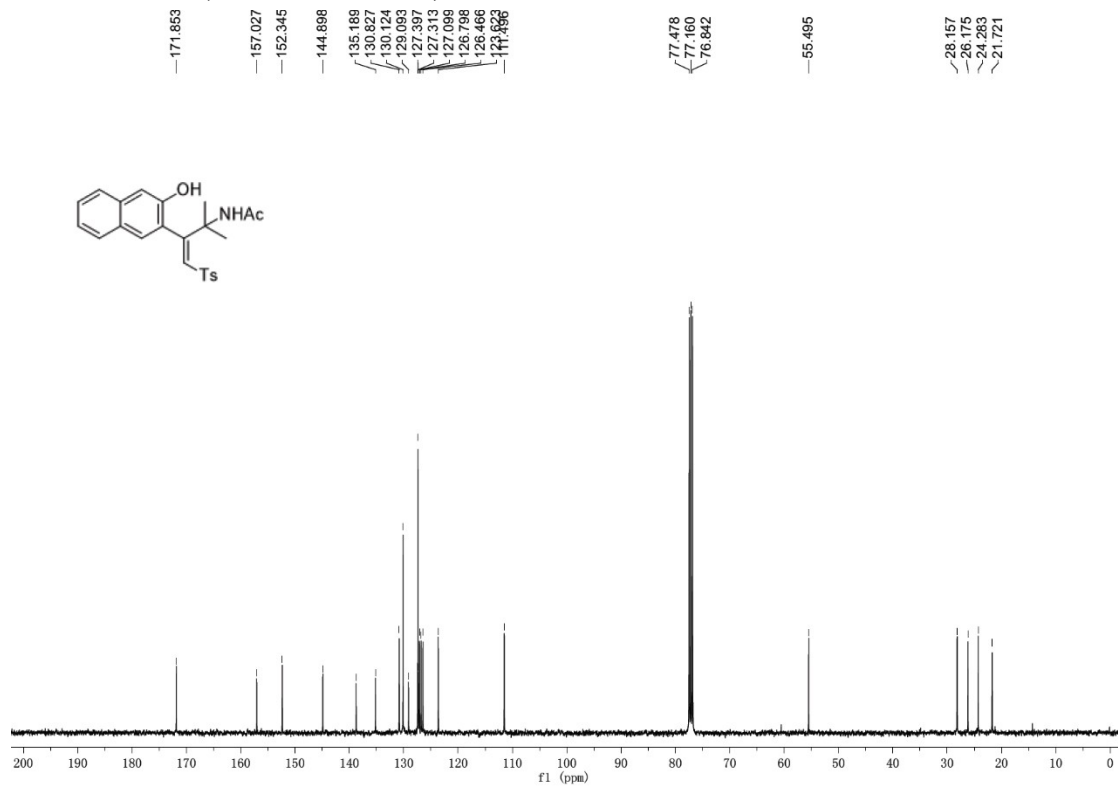

**3sa**-<sup>1</sup>H NMR (400 MHz, CDCl<sub>3</sub>)

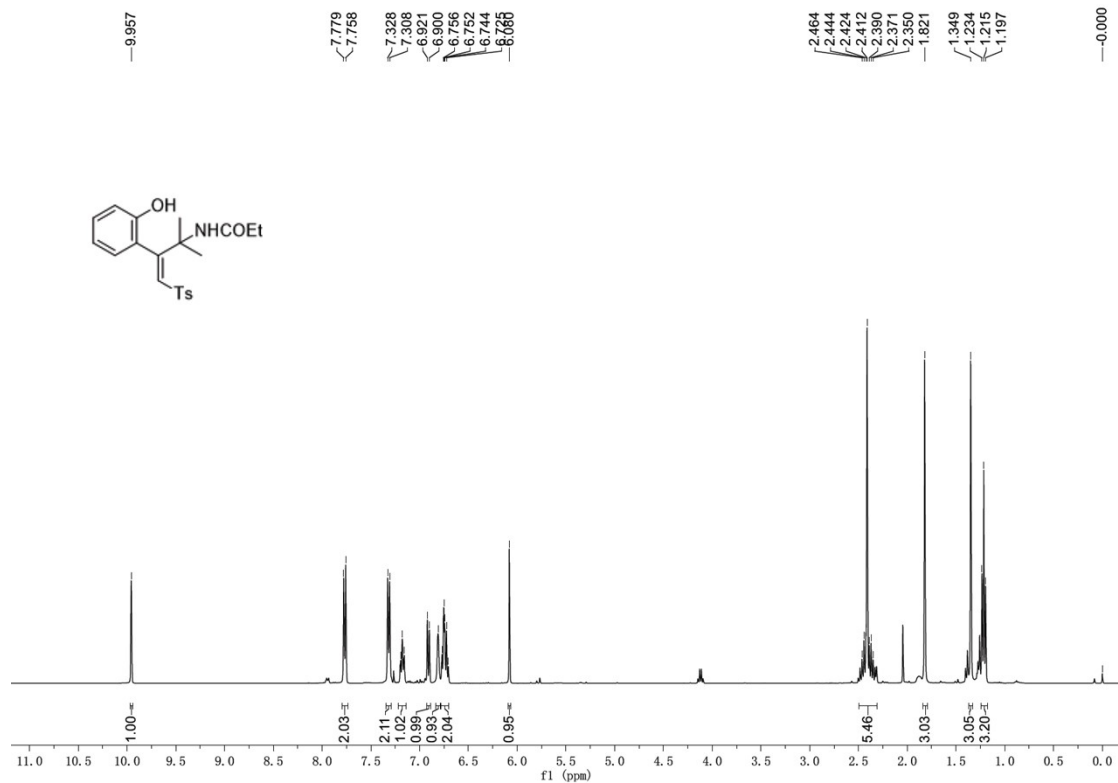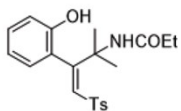

**3sa**-<sup>13</sup>C NMR (100 MHz, CDCl<sub>3</sub>)

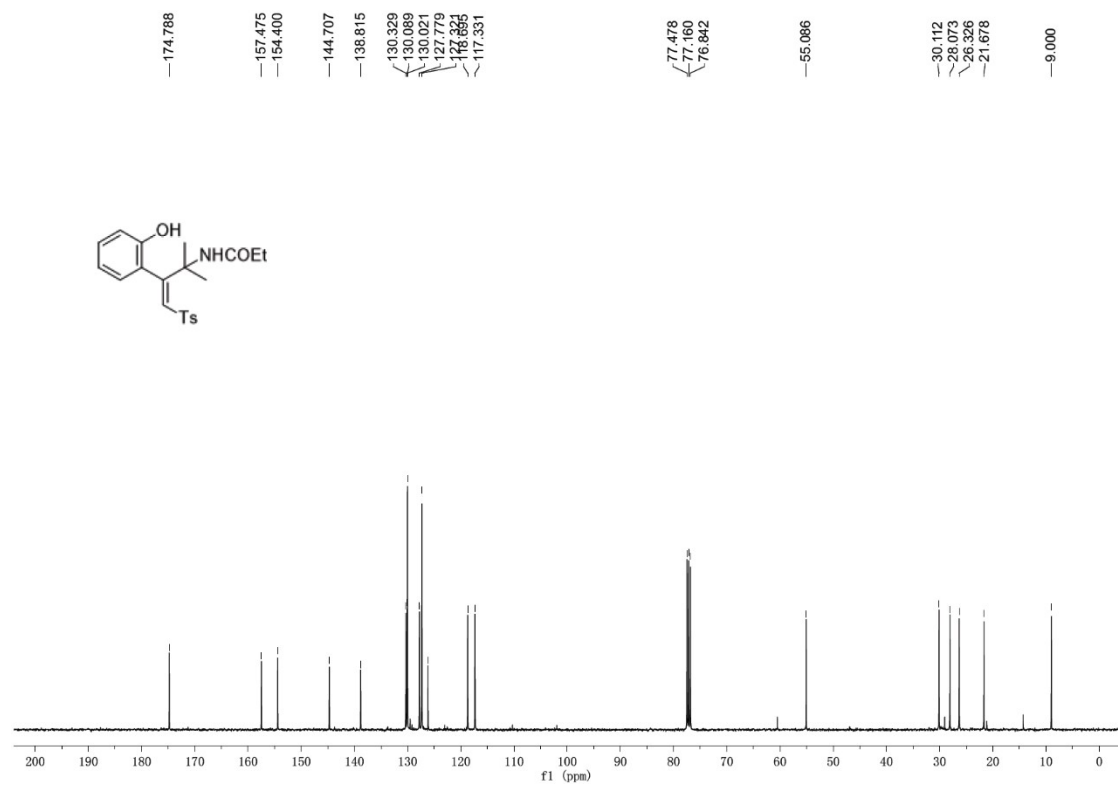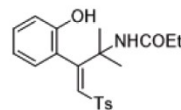

**3ta**-<sup>1</sup>H NMR (400 MHz, CDCl<sub>3</sub>)

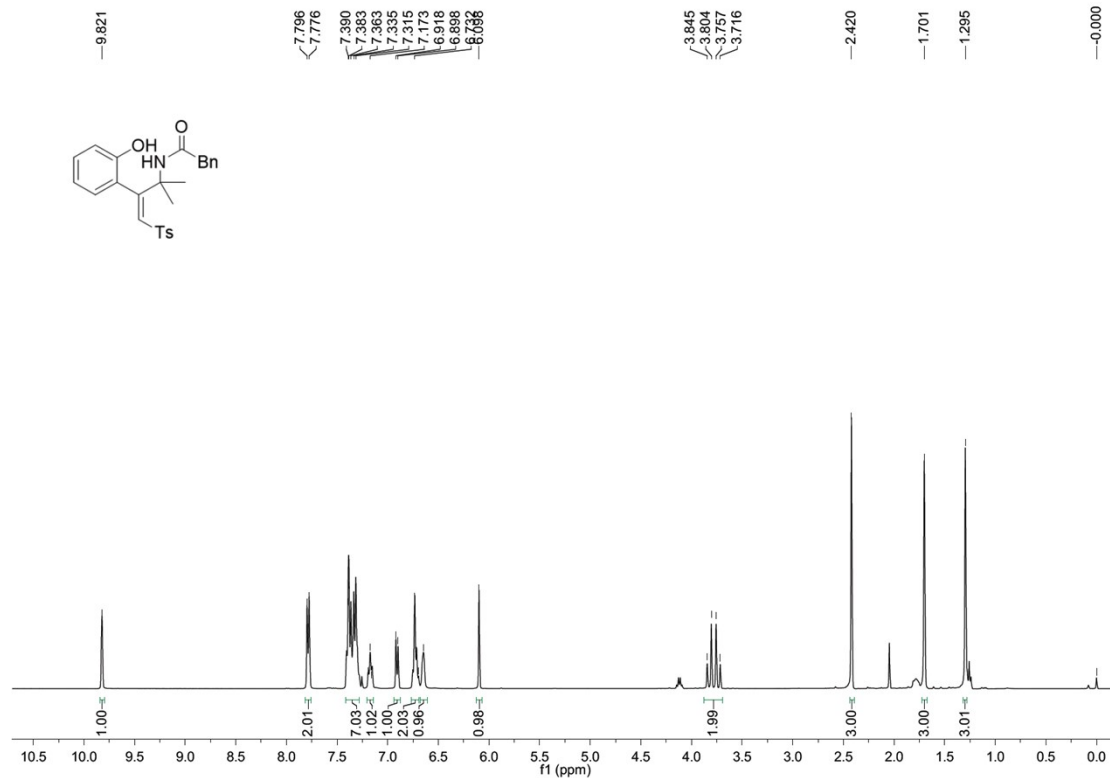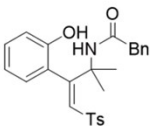

**3ta**-<sup>13</sup>C NMR (100 MHz, CDCl<sub>3</sub>)

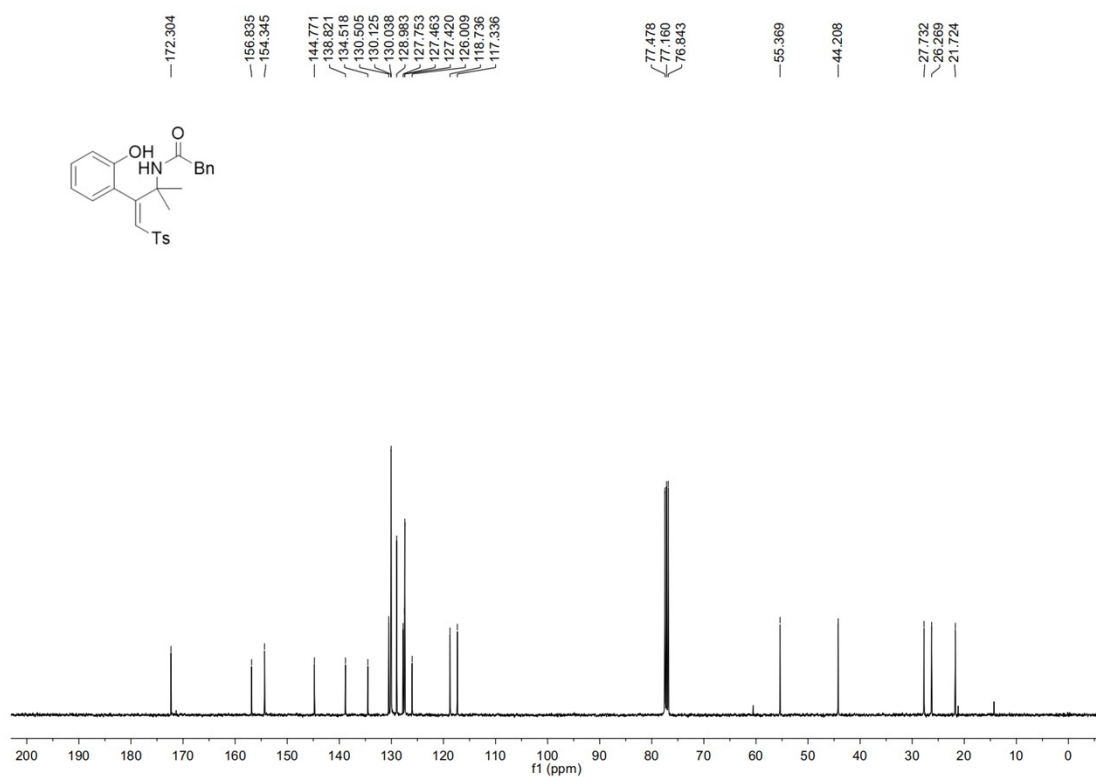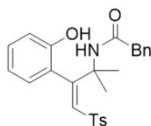

**3ab-<sup>1</sup>H NMR (400 MHz, CDCl<sub>3</sub>)**

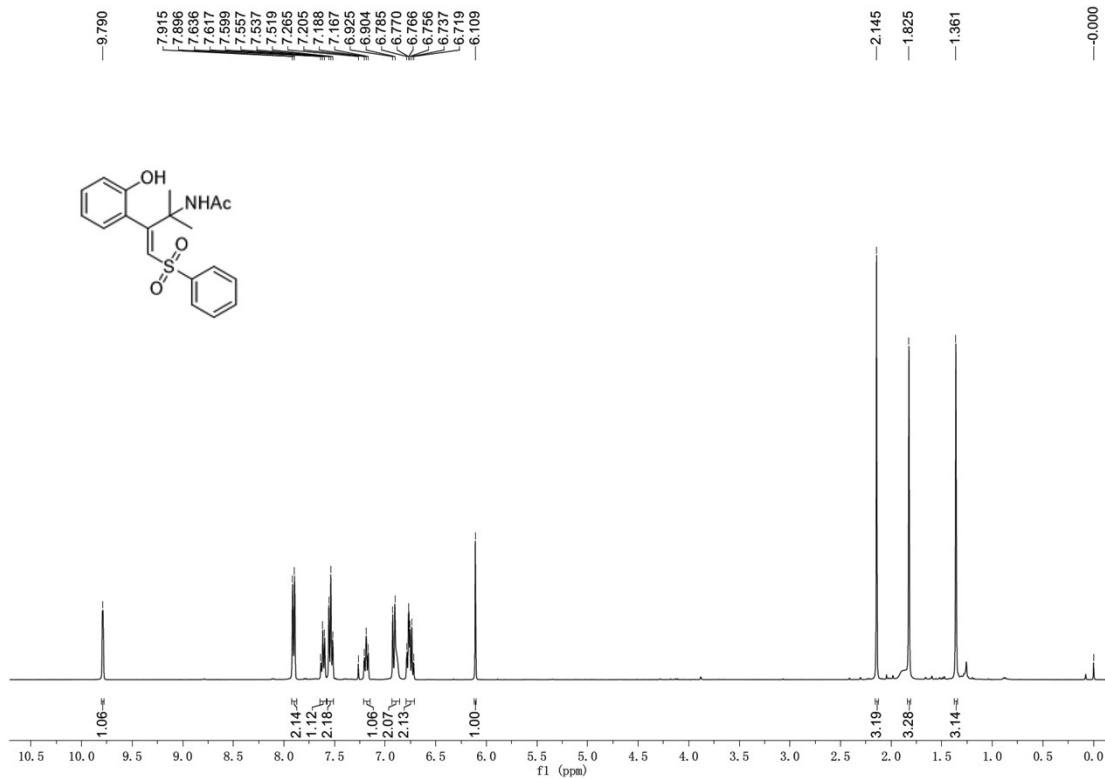

**3ab-<sup>13</sup>C NMR (100 MHz, CDCl<sub>3</sub>)**

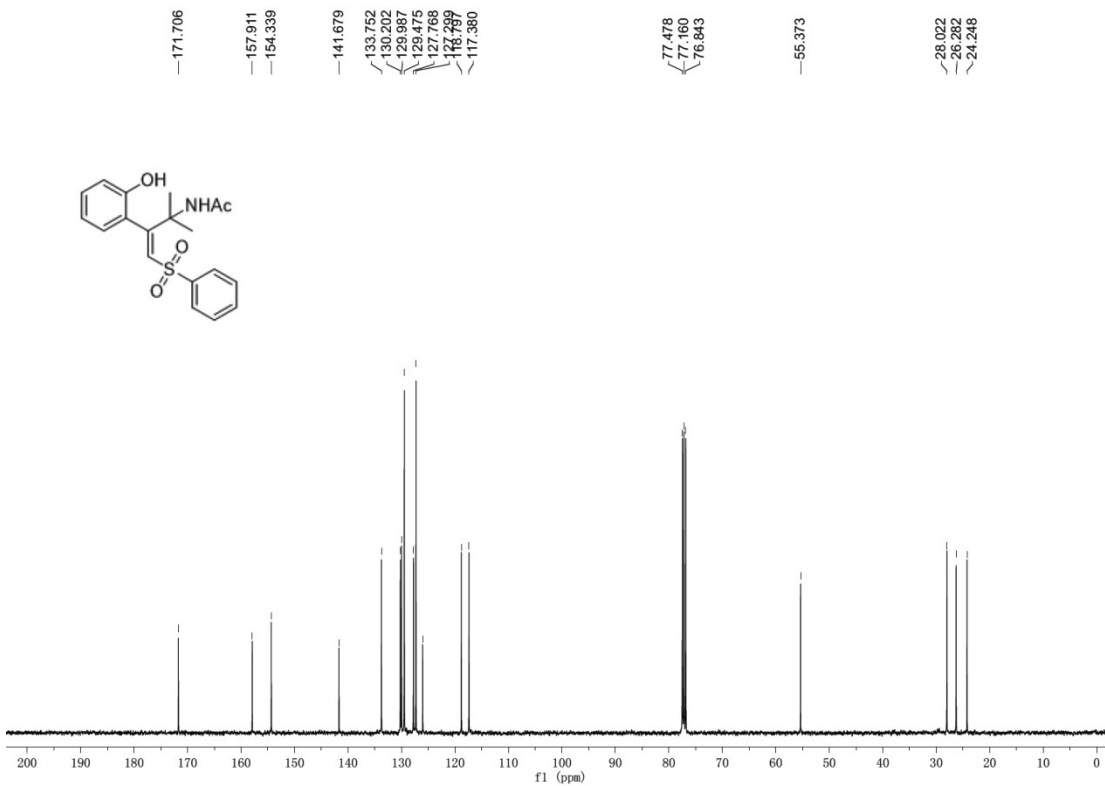

**3ac-<sup>1</sup>H NMR (400 MHz, CDCl<sub>3</sub>)**

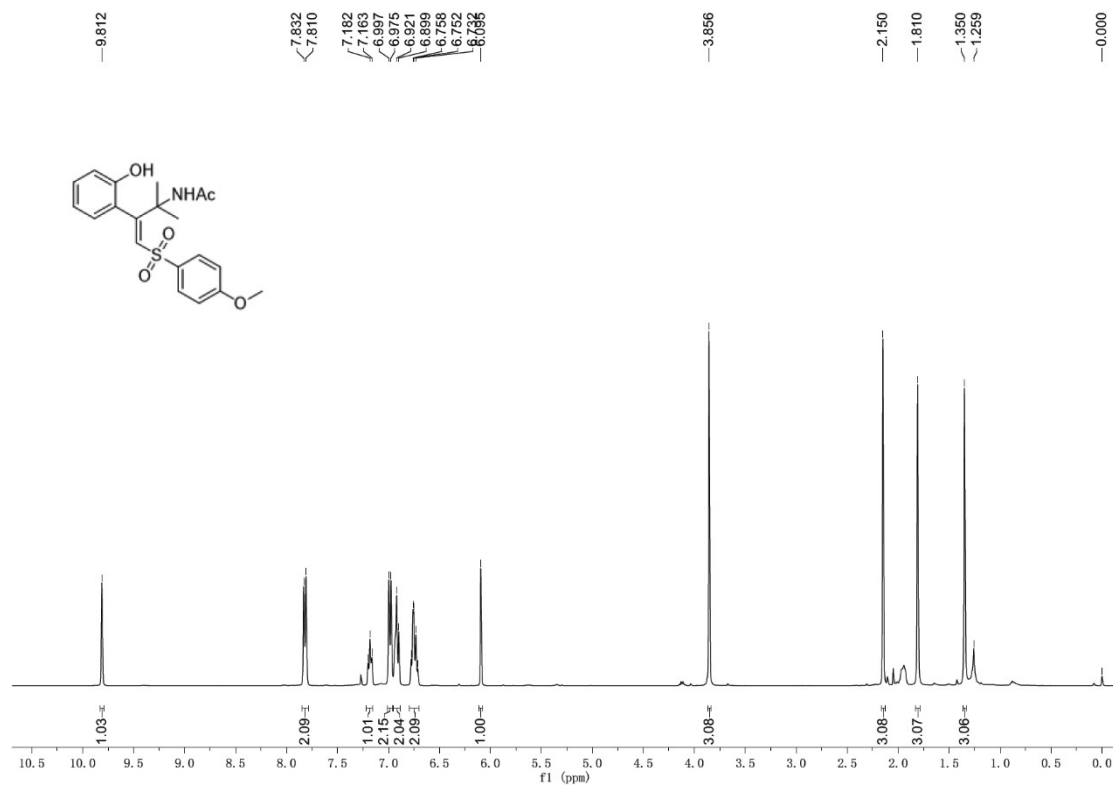

**3ac-<sup>13</sup>C NMR (100 MHz, CDCl<sub>3</sub>)**

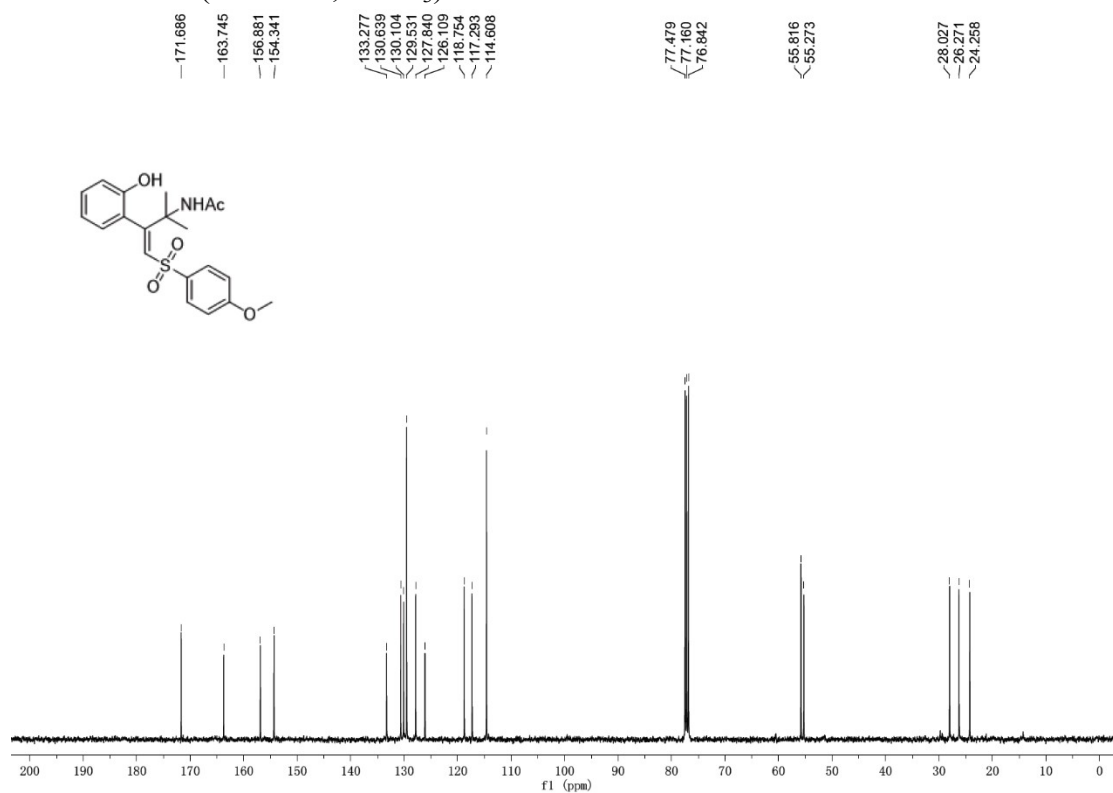

**3ad-<sup>1</sup>H NMR (400 MHz, CDCl<sub>3</sub>)**

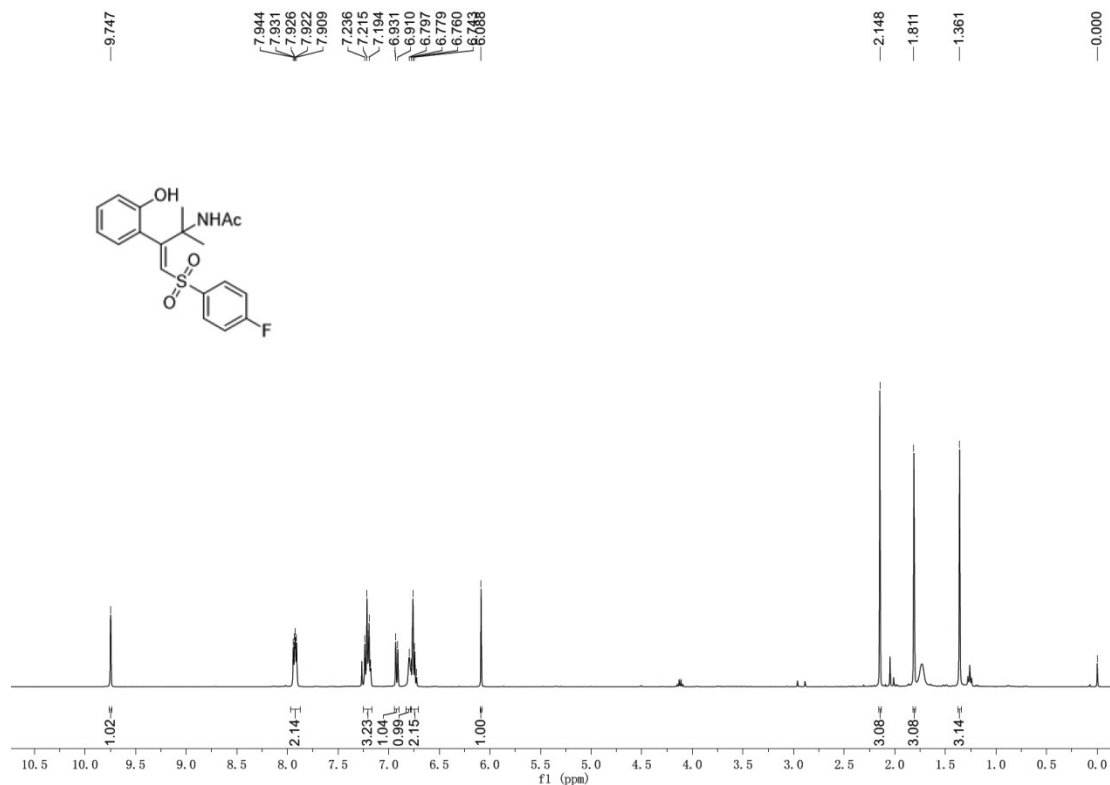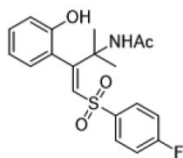

**3ad-<sup>13</sup>C NMR (100 MHz, CDCl<sub>3</sub>)**

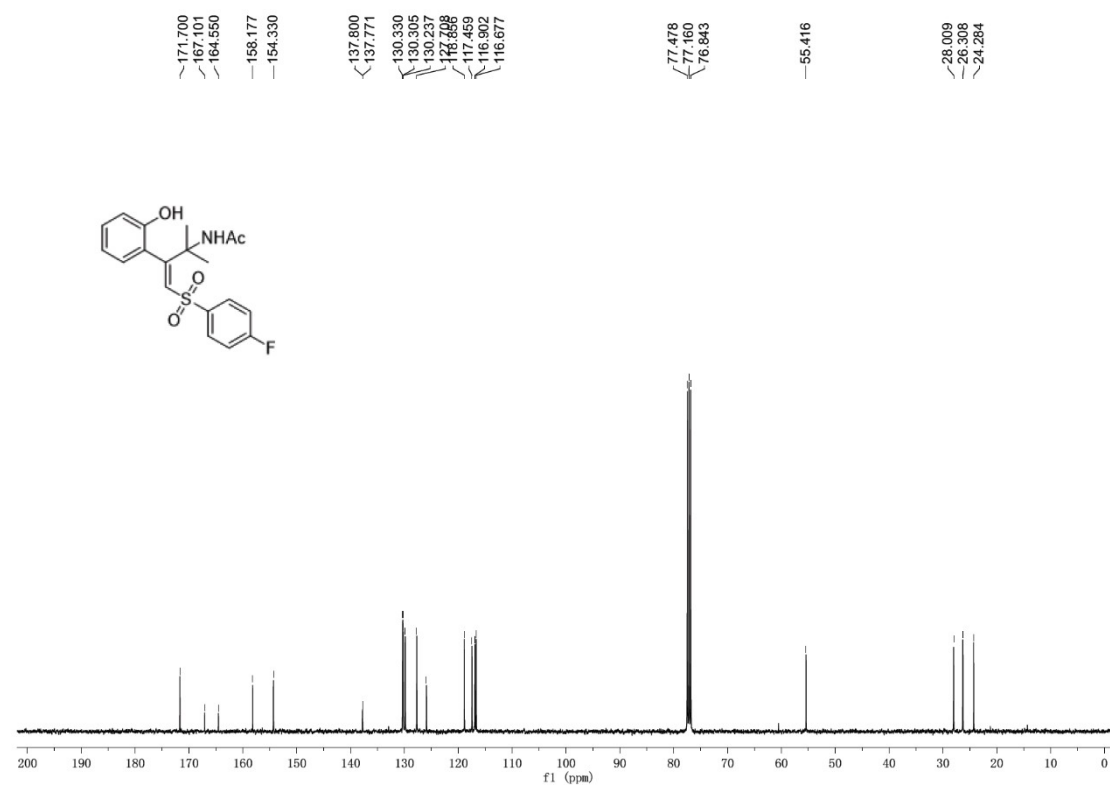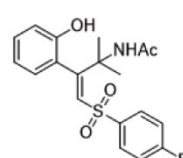

**3ad**-<sup>19</sup>F NMR (376 MHz, CDCl<sub>3</sub>)

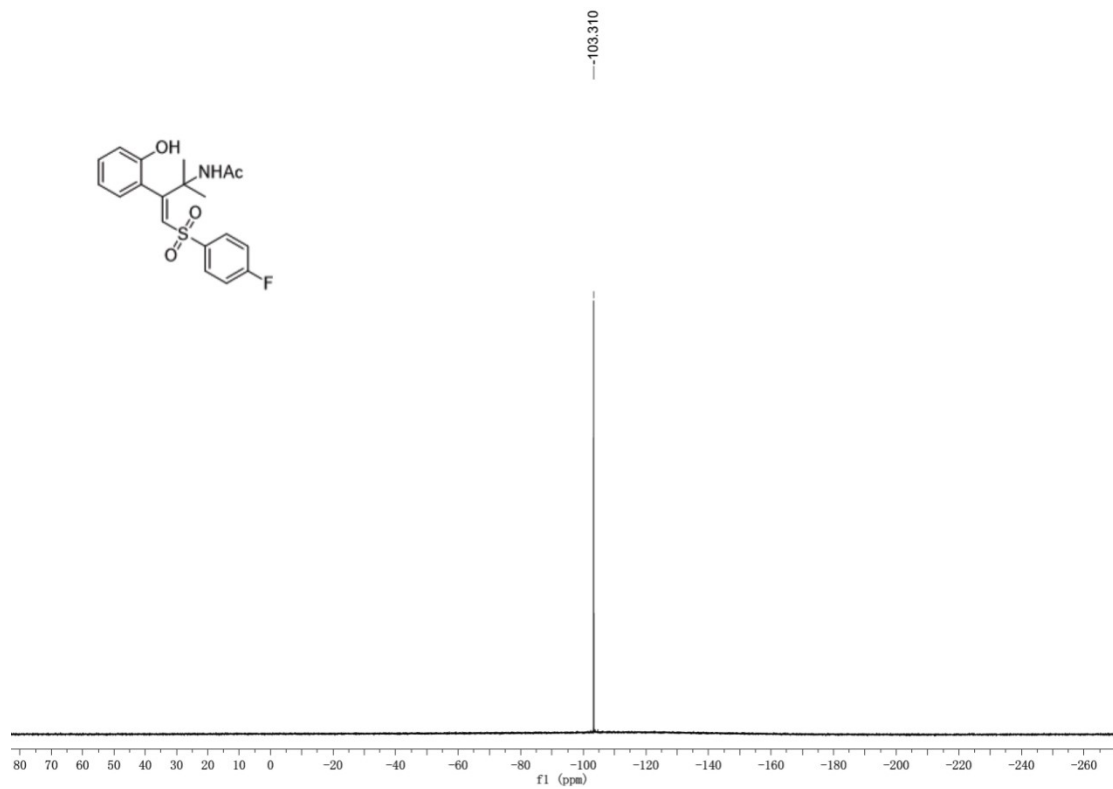

**3ae-<sup>1</sup>H NMR (400 MHz, CDCl<sub>3</sub>)**

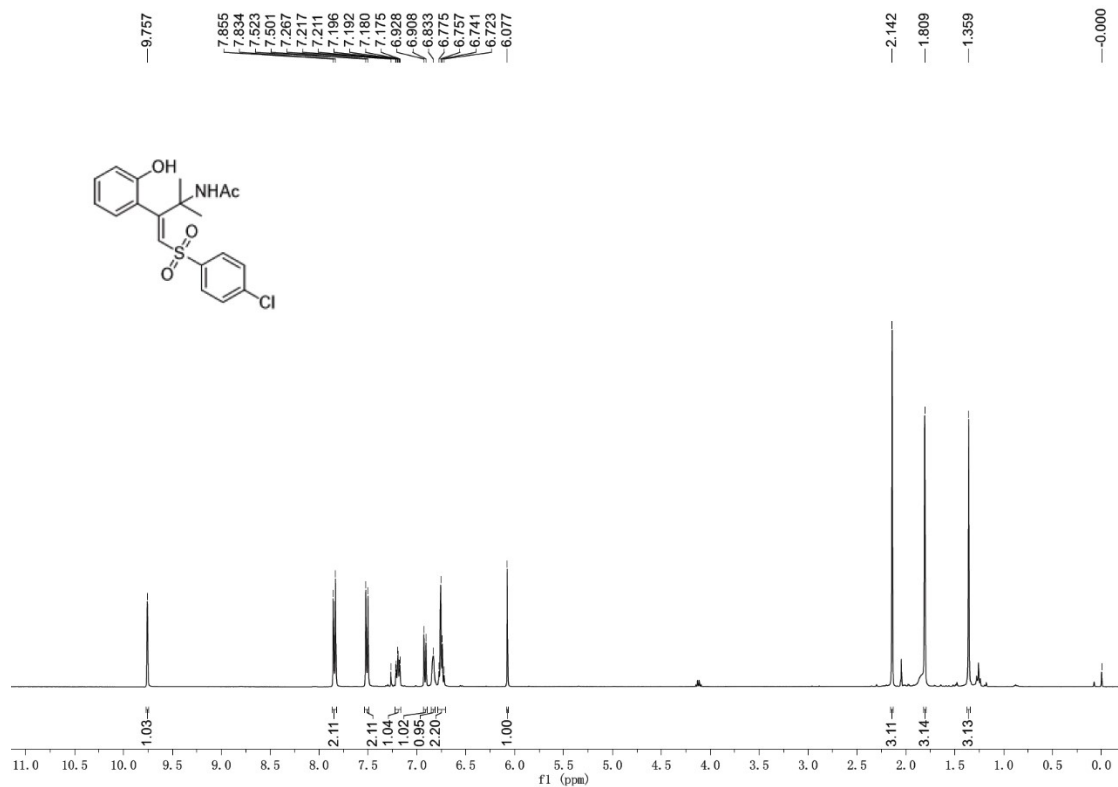

**3ae-<sup>13</sup>C NMR (100 MHz, CDCl<sub>3</sub>)**

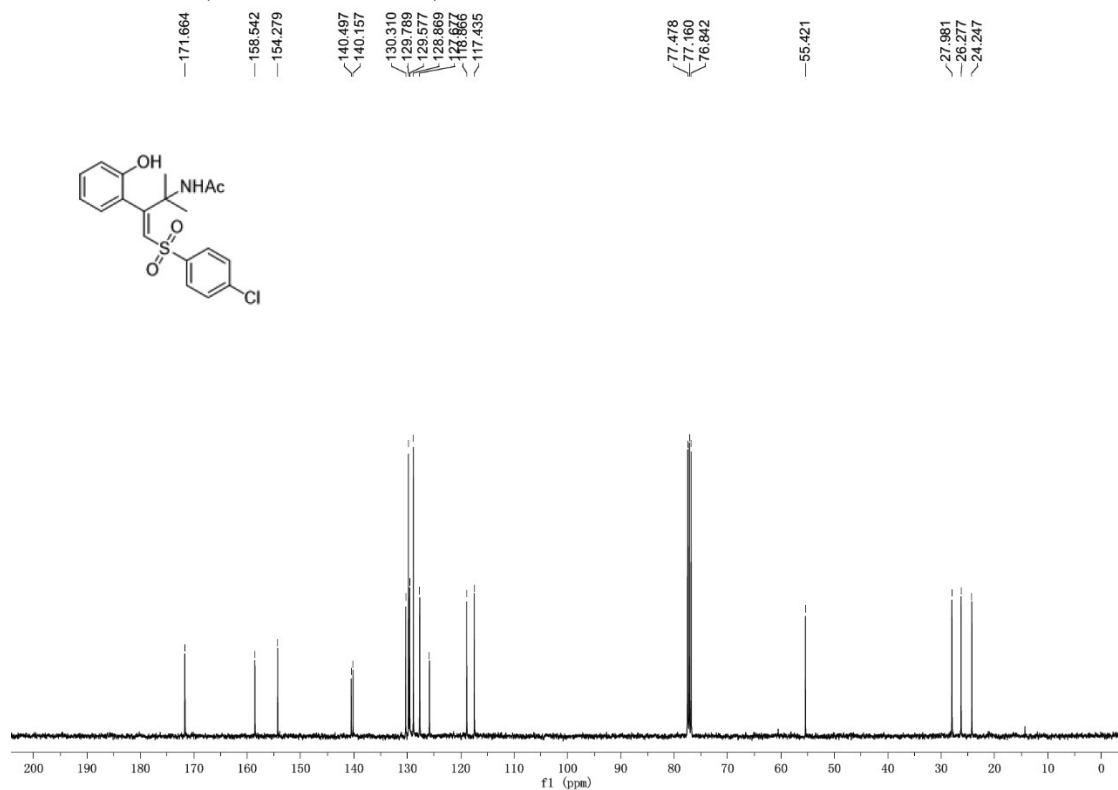



**3af-<sup>1</sup>H NMR (400 MHz, CDCl<sub>3</sub>)**

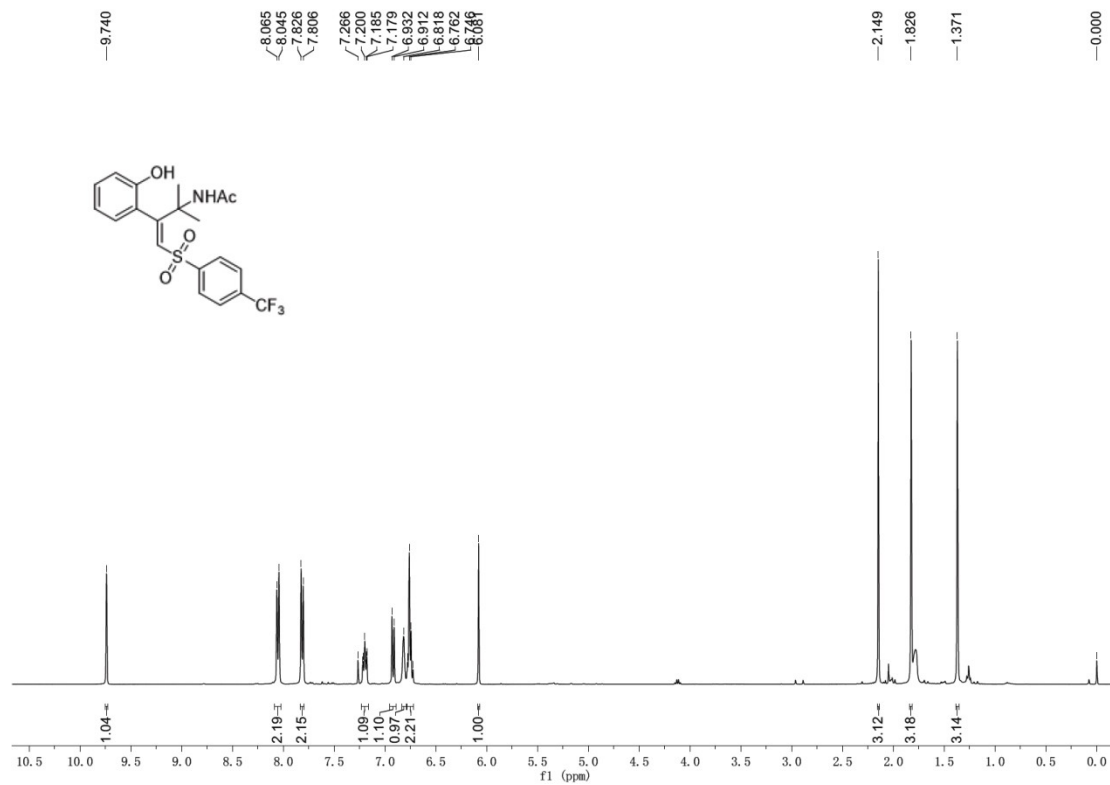

**3af-<sup>13</sup>C NMR (100 MHz, CDCl<sub>3</sub>)**

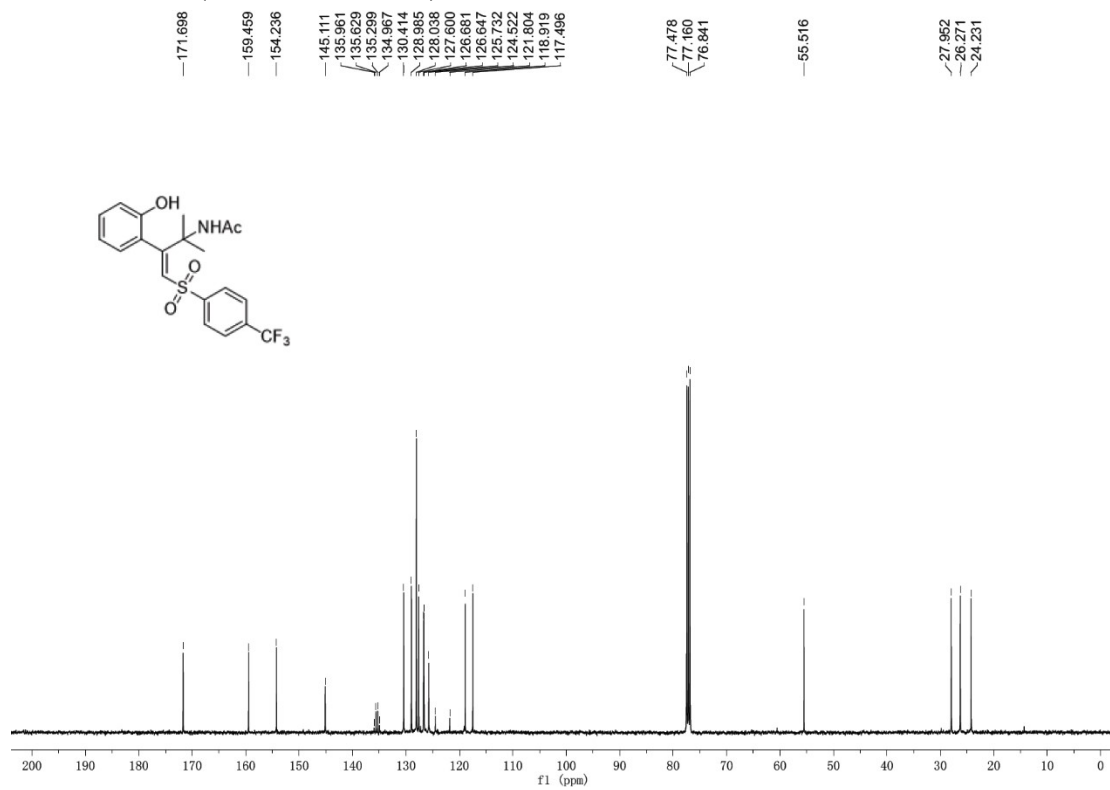

**3af**-<sup>19</sup>F NMR (376 MHz, CDCl<sub>3</sub>)

—63.130

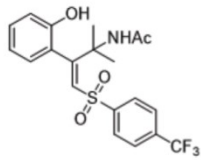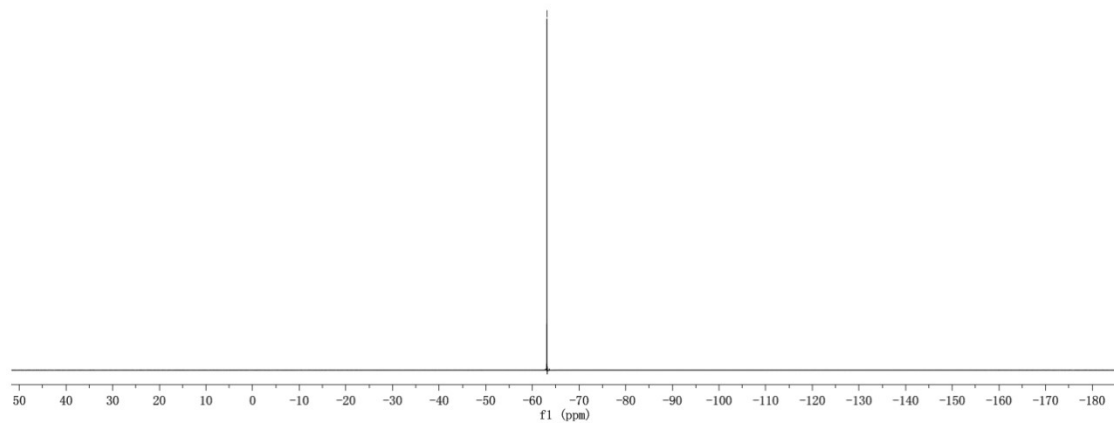

### 3ag-<sup>1</sup>H NMR (400 MHz, CDCl<sub>3</sub>)

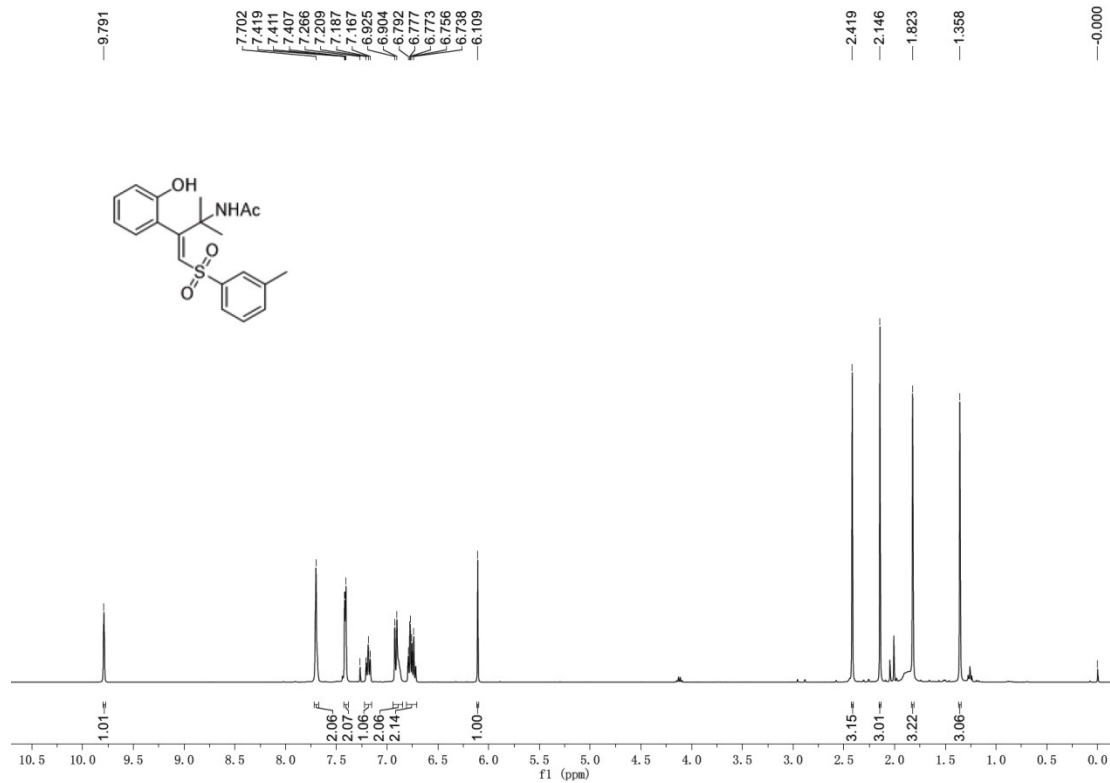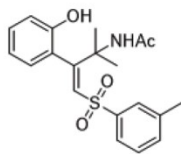

### 3ag-<sup>13</sup>C NMR (100 MHz, CDCl<sub>3</sub>)

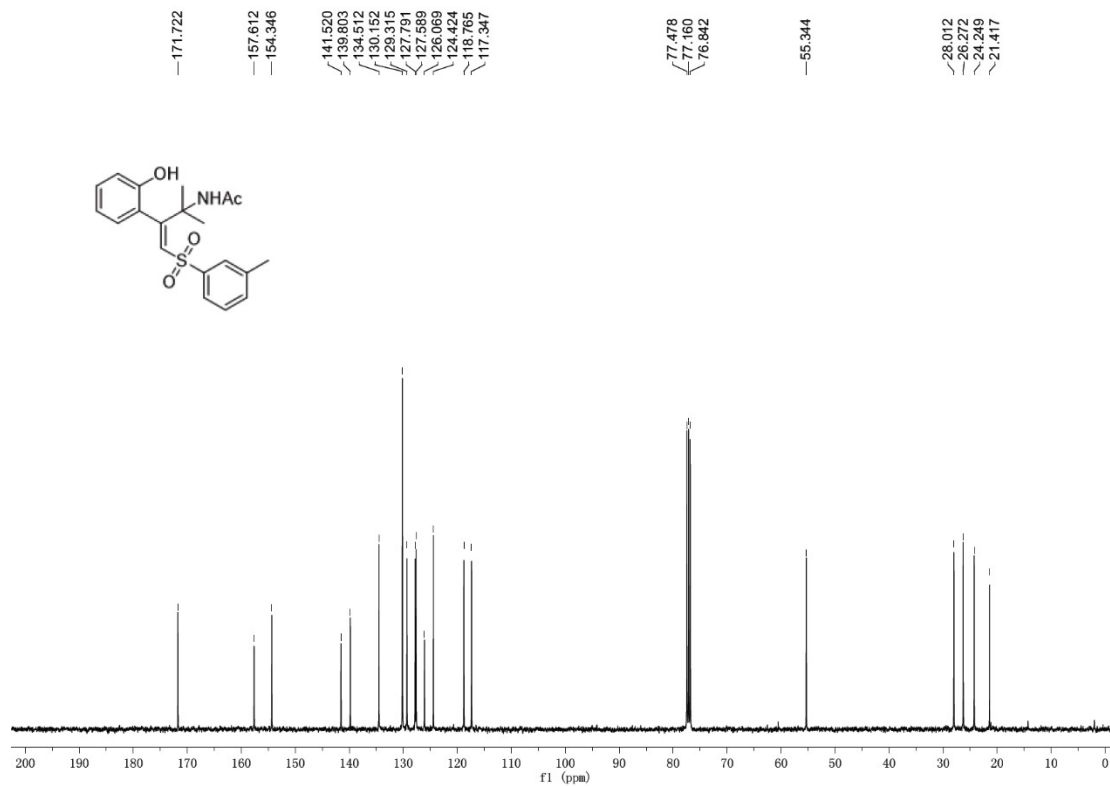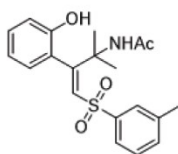

**3ah**-<sup>1</sup>H NMR (400 MHz, CDCl<sub>3</sub>)

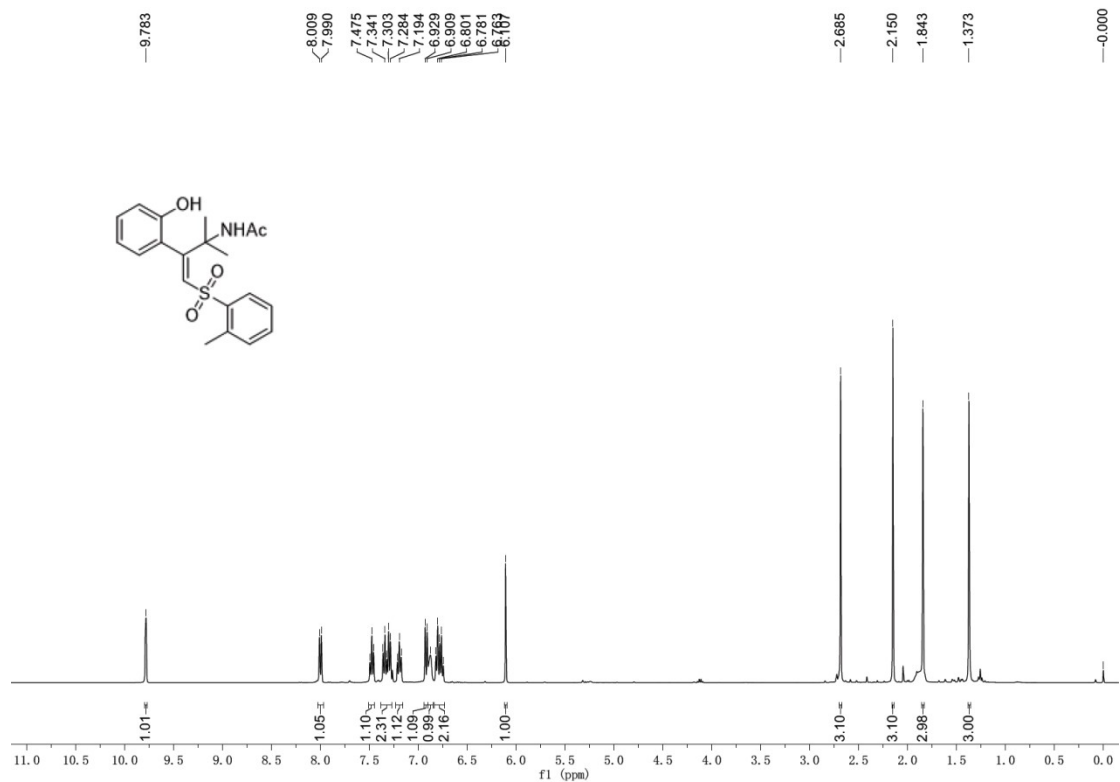

**3ah**-<sup>13</sup>C NMR (100 MHz, CDCl<sub>3</sub>)

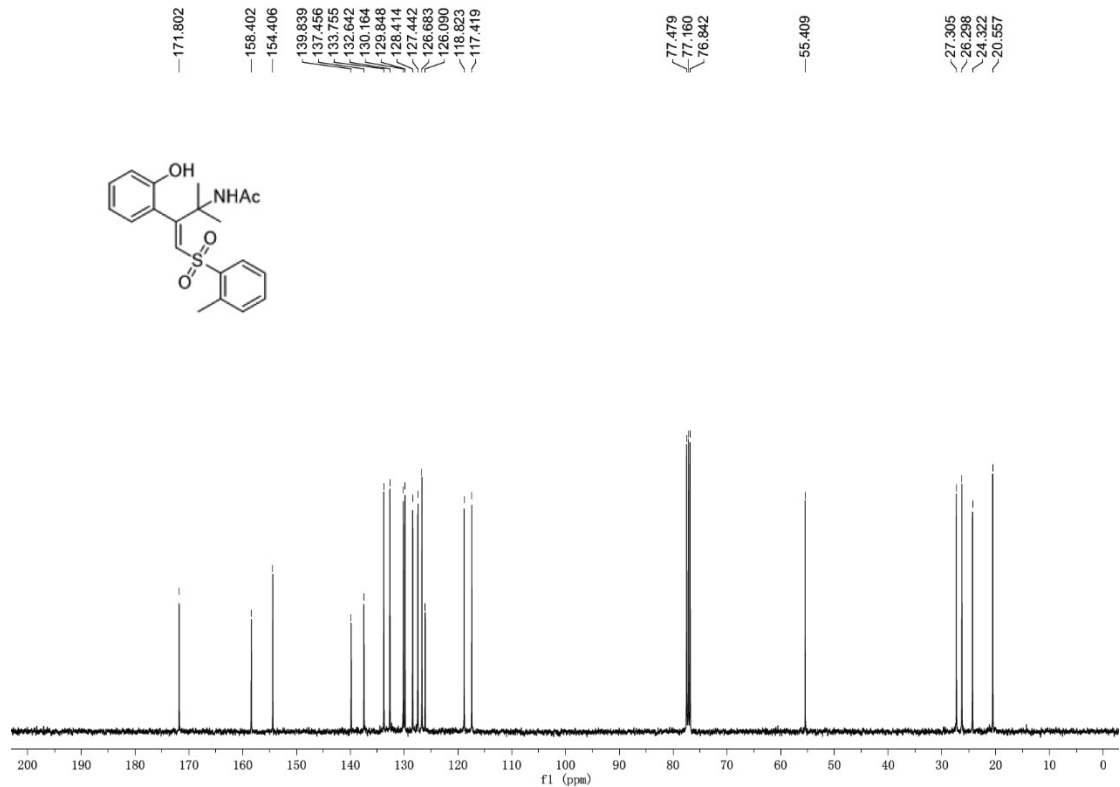

**3ai**-<sup>1</sup>H NMR (400 MHz, CDCl<sub>3</sub>)

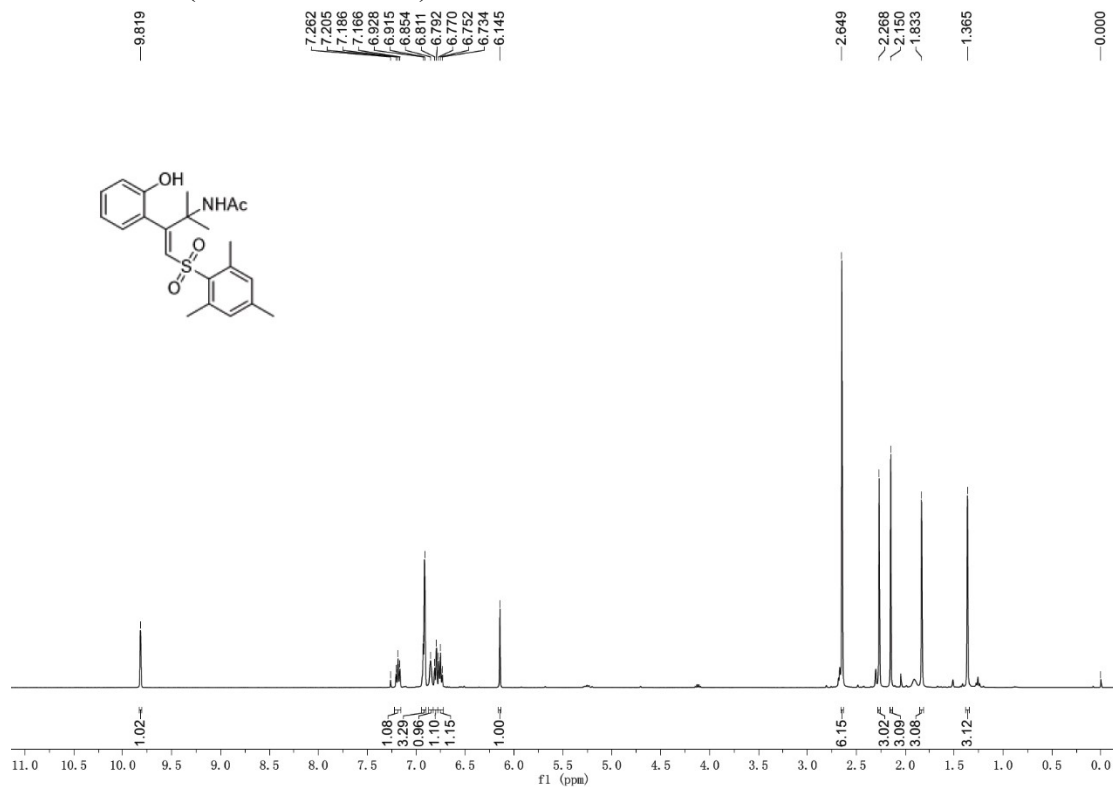

**3ai**-<sup>13</sup>C NMR (100 MHz, CDCl<sub>3</sub>)

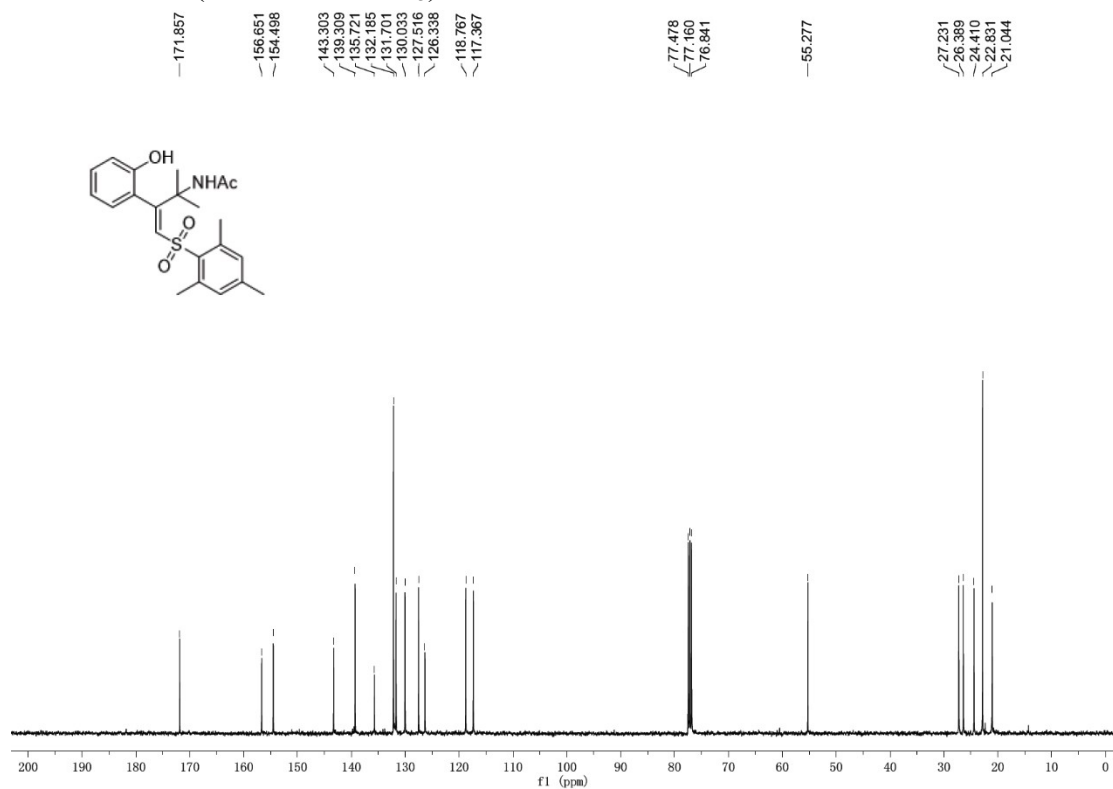

### 5a-<sup>1</sup>H NMR (400 MHz, CDCl<sub>3</sub>)

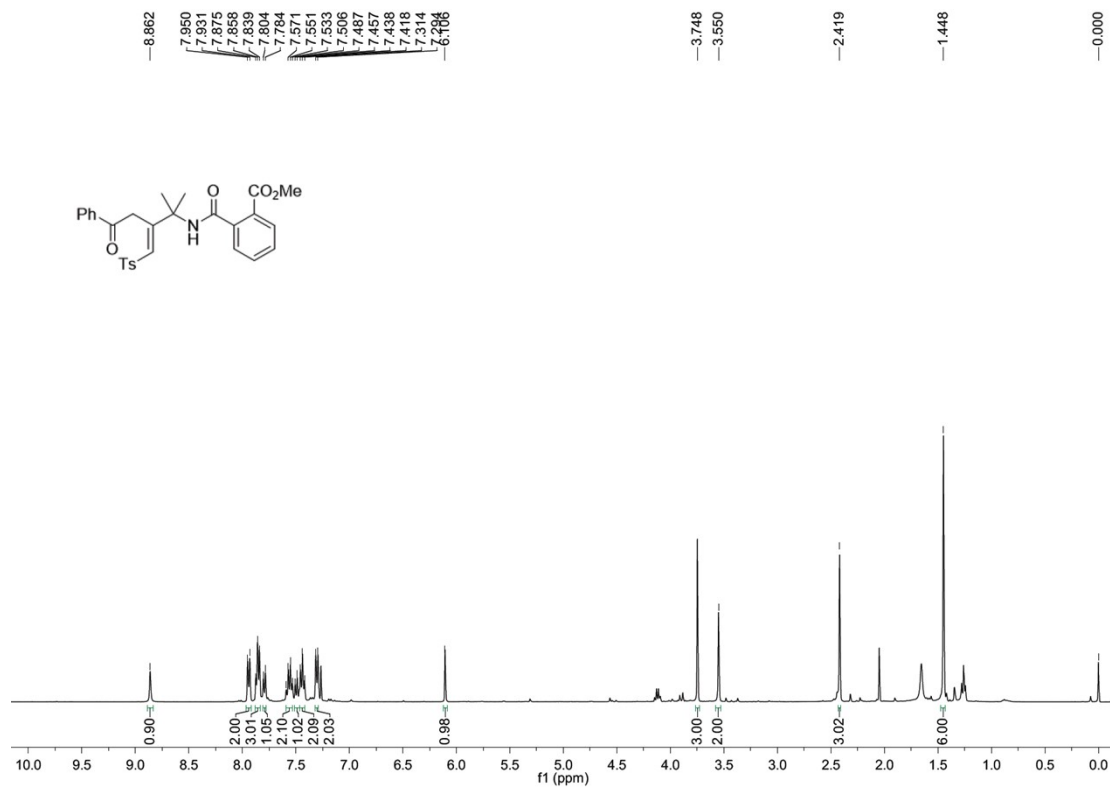

### 5a-<sup>13</sup>C NMR (100 MHz, CDCl<sub>3</sub>)

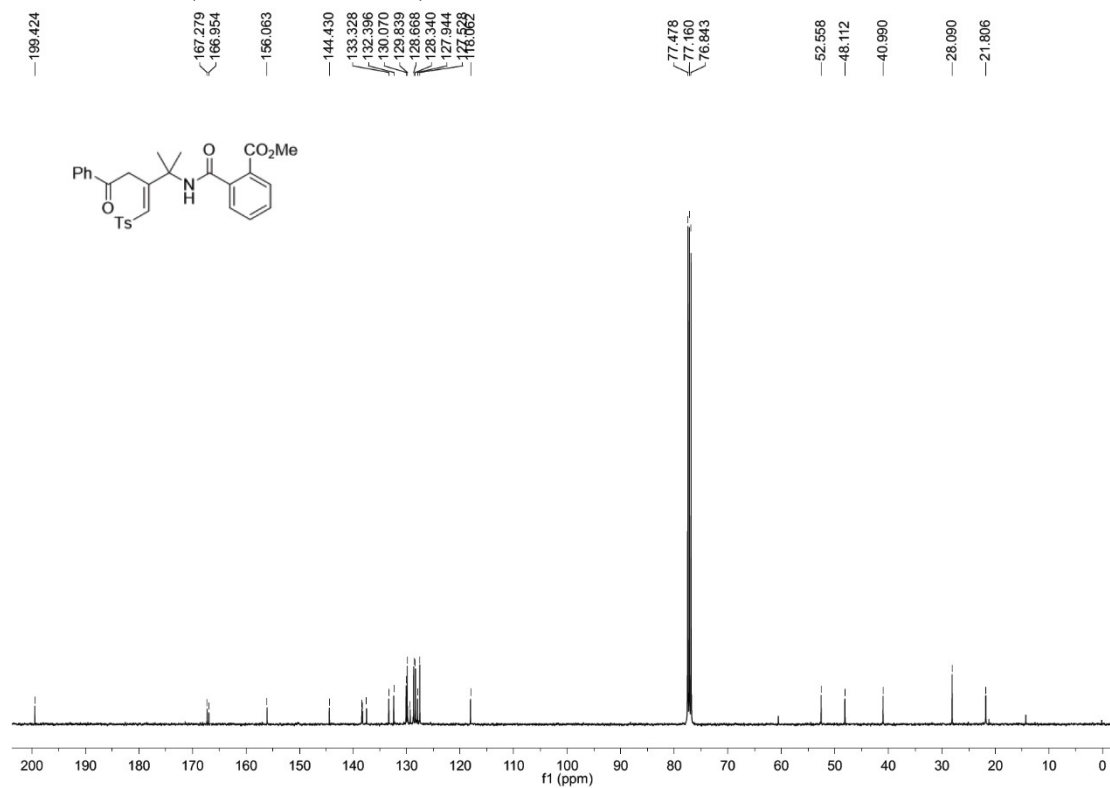

**5b-<sup>1</sup>H NMR (400 MHz, CDCl<sub>3</sub>)**

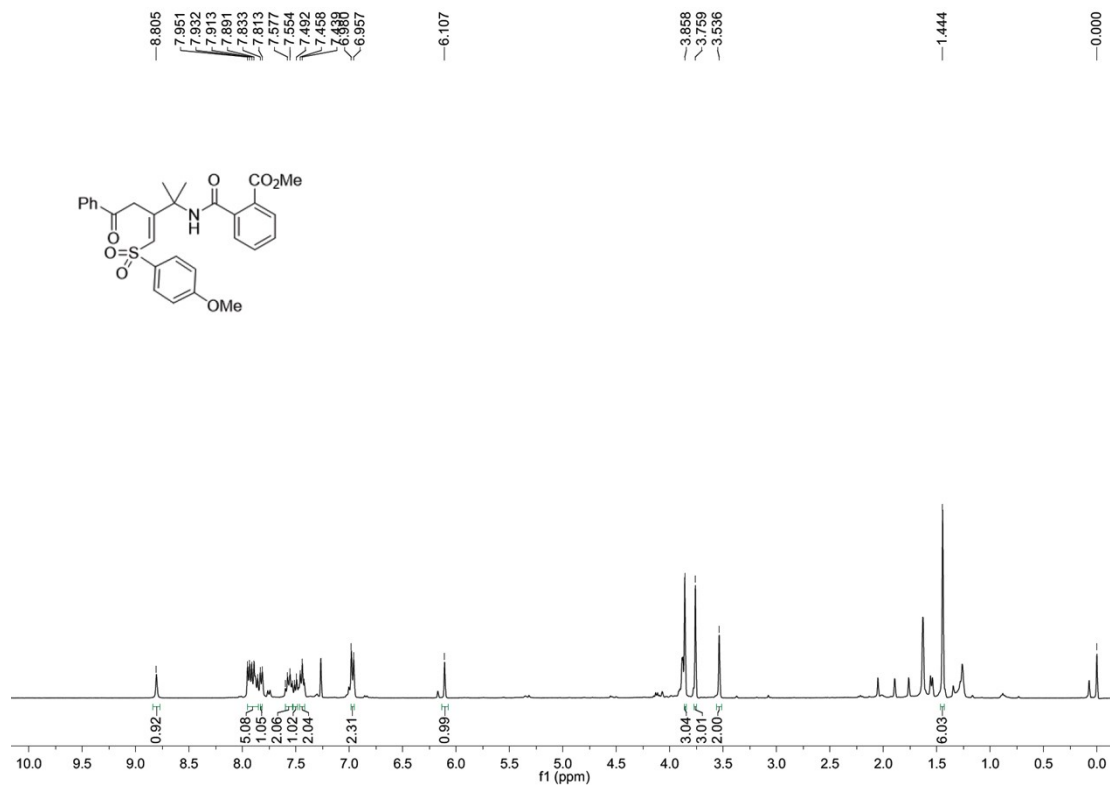

**5b-<sup>13</sup>C NMR (100 MHz, CDCl<sub>3</sub>)**

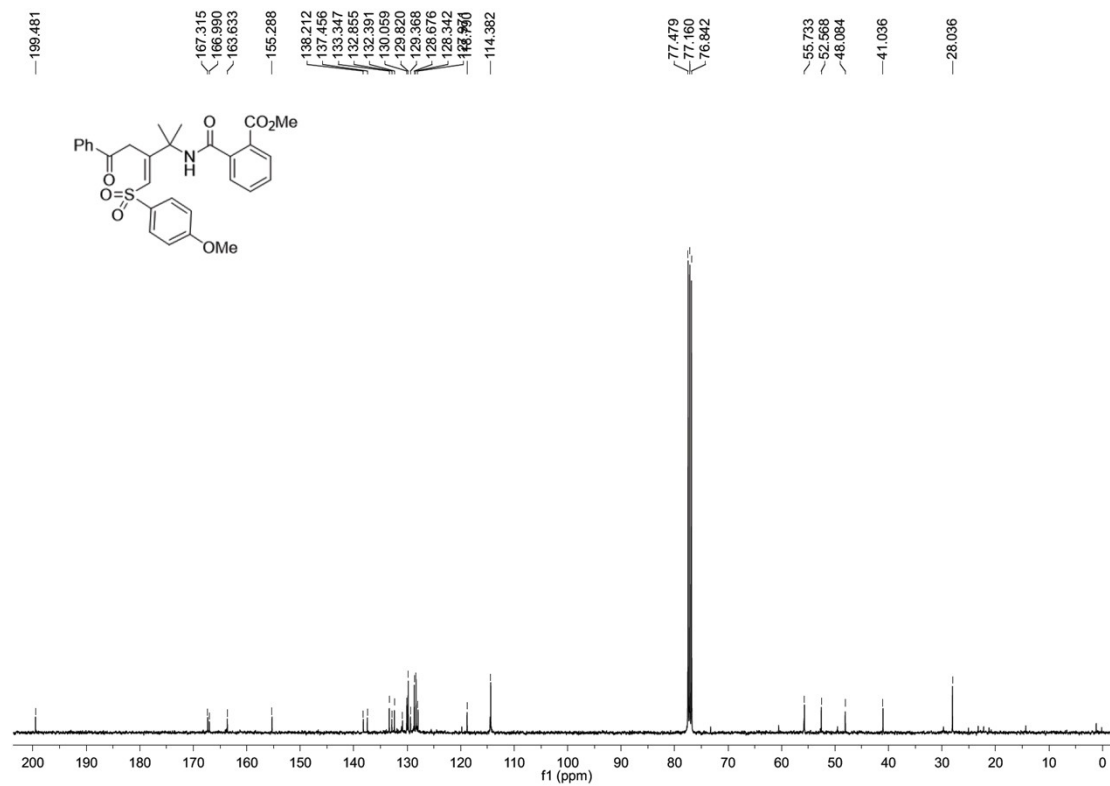

### 5c-<sup>1</sup>H NMR (400 MHz, CDCl<sub>3</sub>)

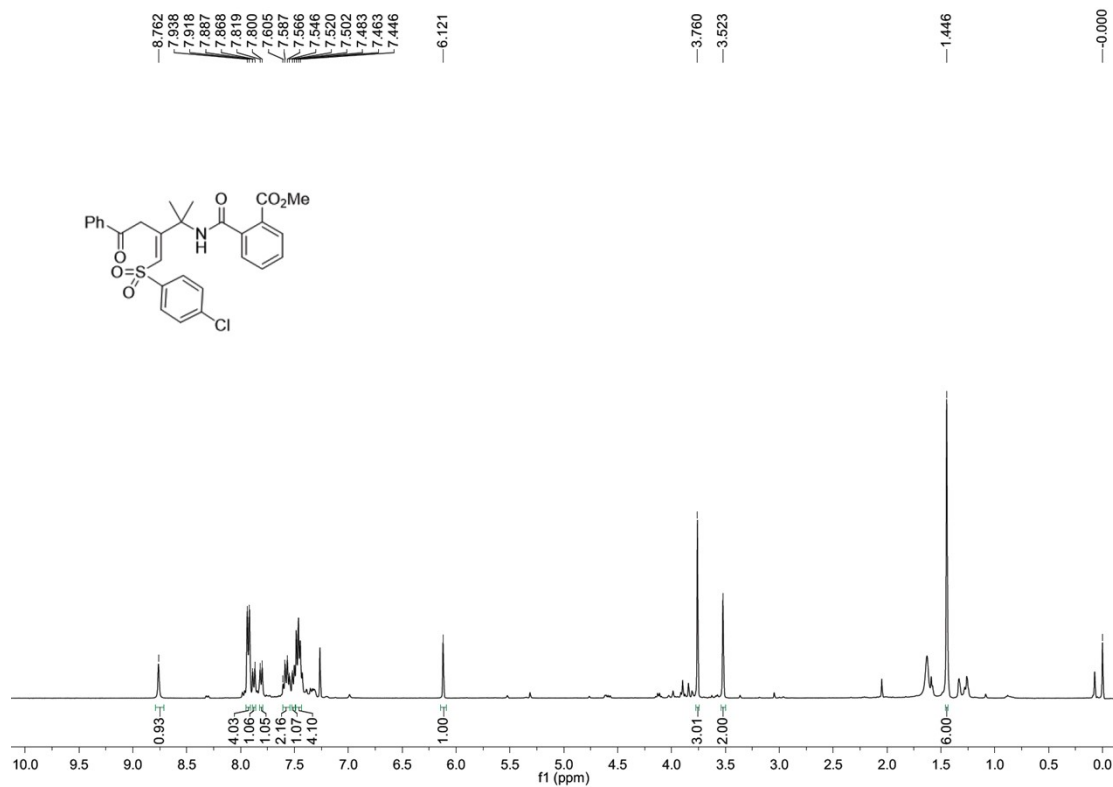

### 5c-<sup>13</sup>C NMR (100 MHz, CDCl<sub>3</sub>)

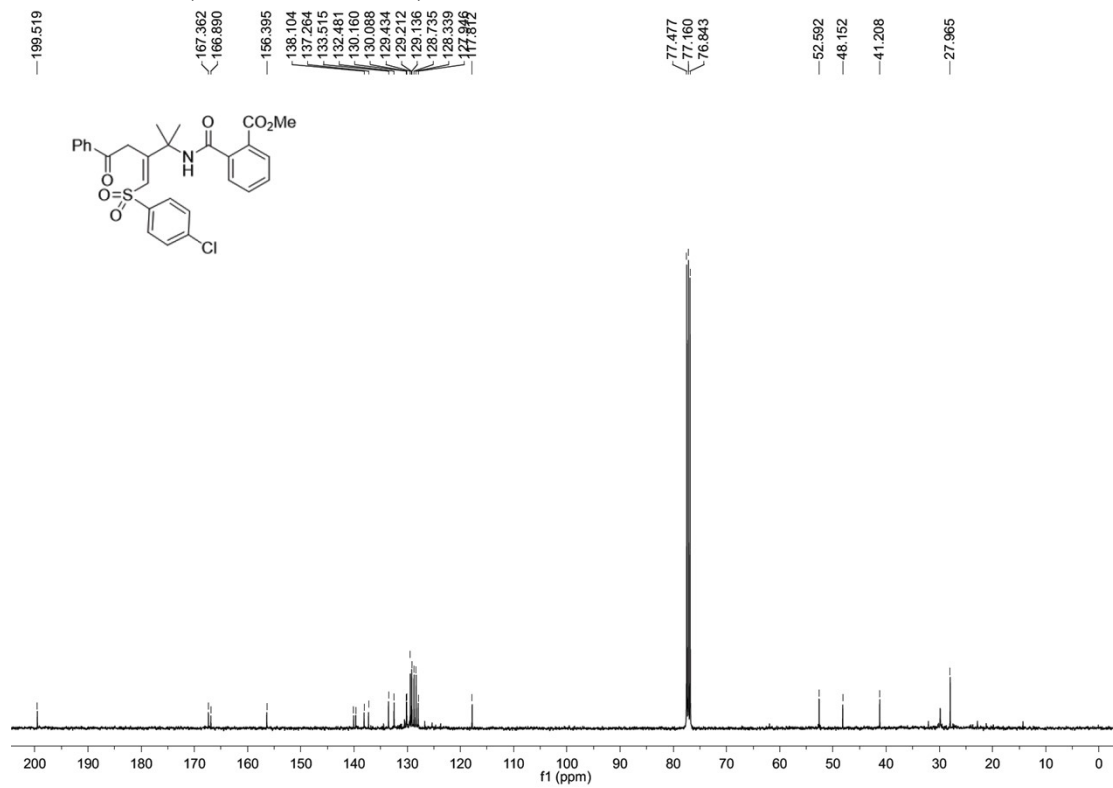



# $^1\text{H}$ - $^1\text{H}$ NOESY of 5c:

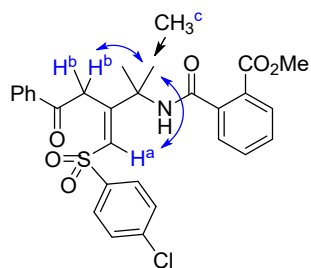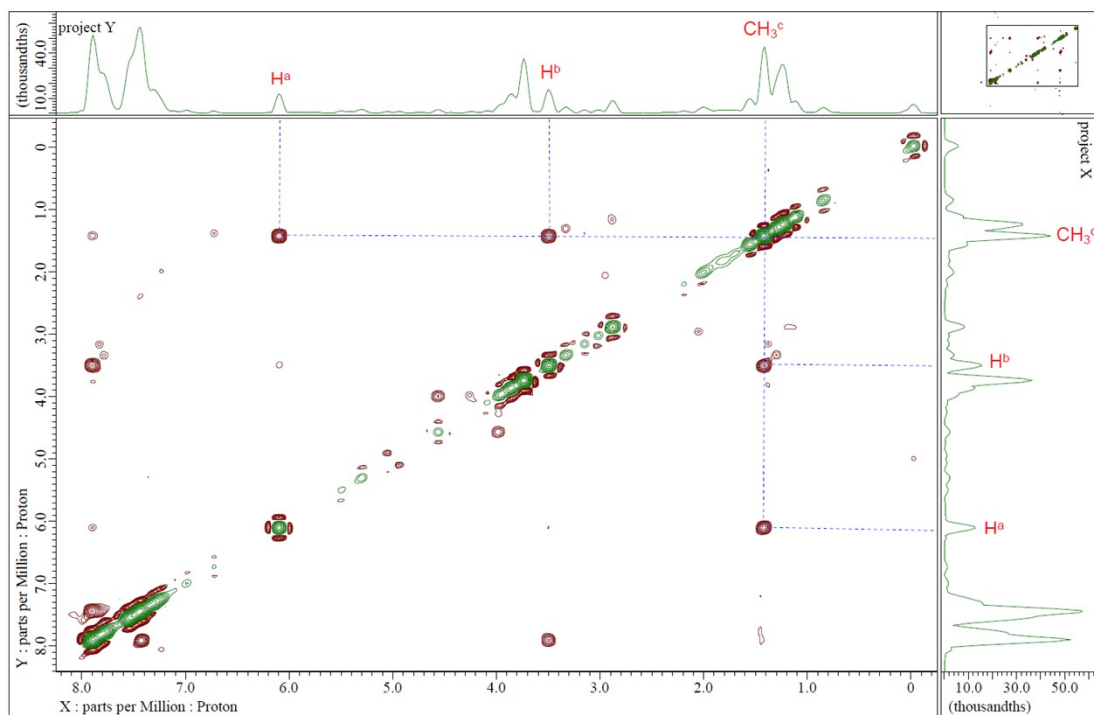

**5d-<sup>1</sup>H NMR (400 MHz, CDCl<sub>3</sub>)**

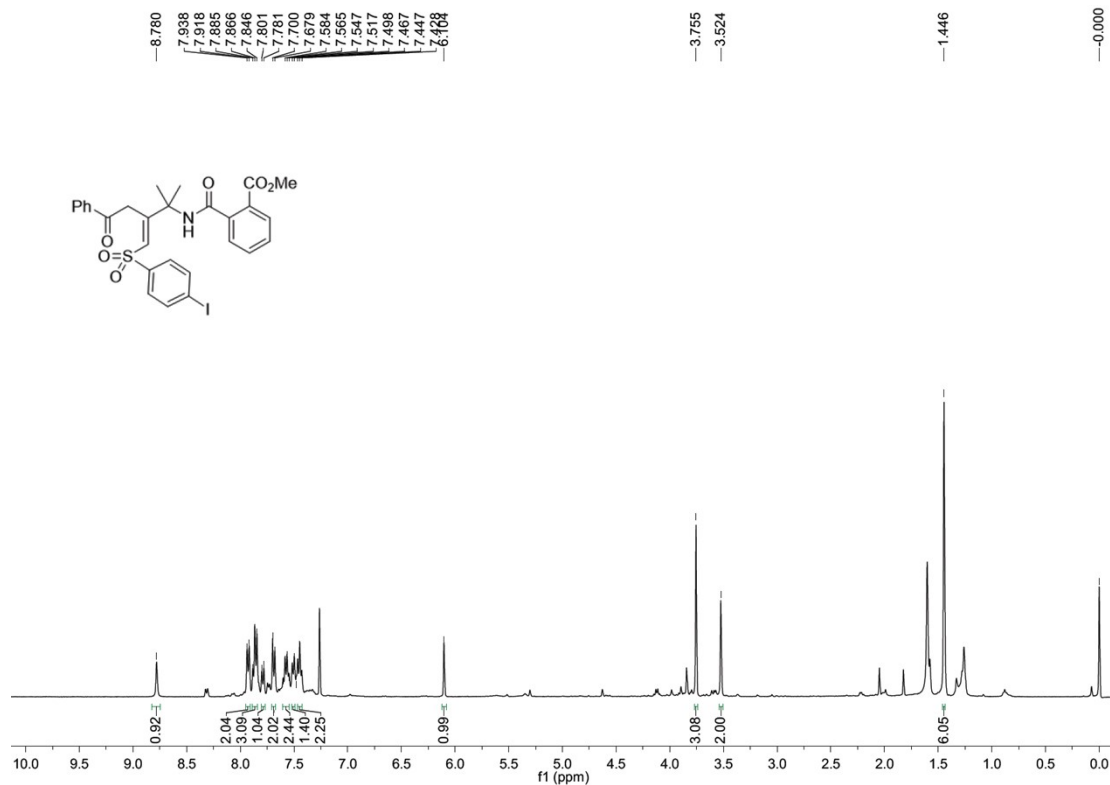

**5d-<sup>13</sup>C NMR (100 MHz, CDCl<sub>3</sub>)**

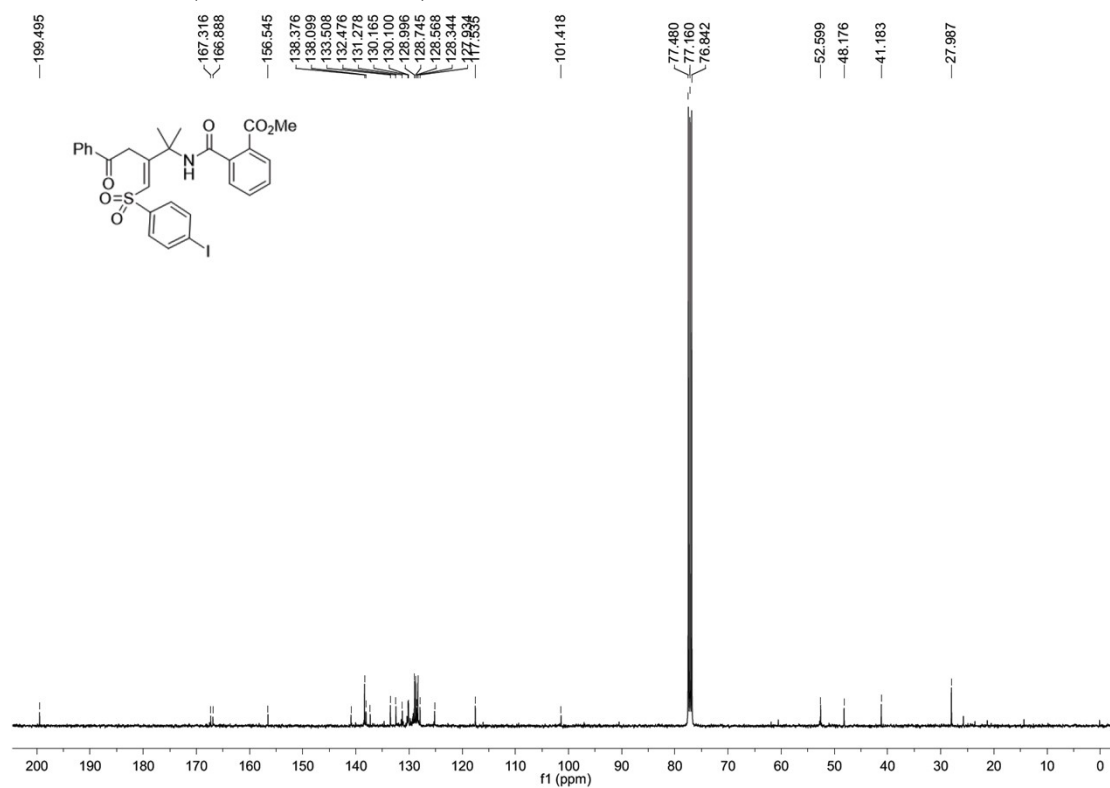

**5e-<sup>1</sup>H NMR (400 MHz, CDCl<sub>3</sub>)**

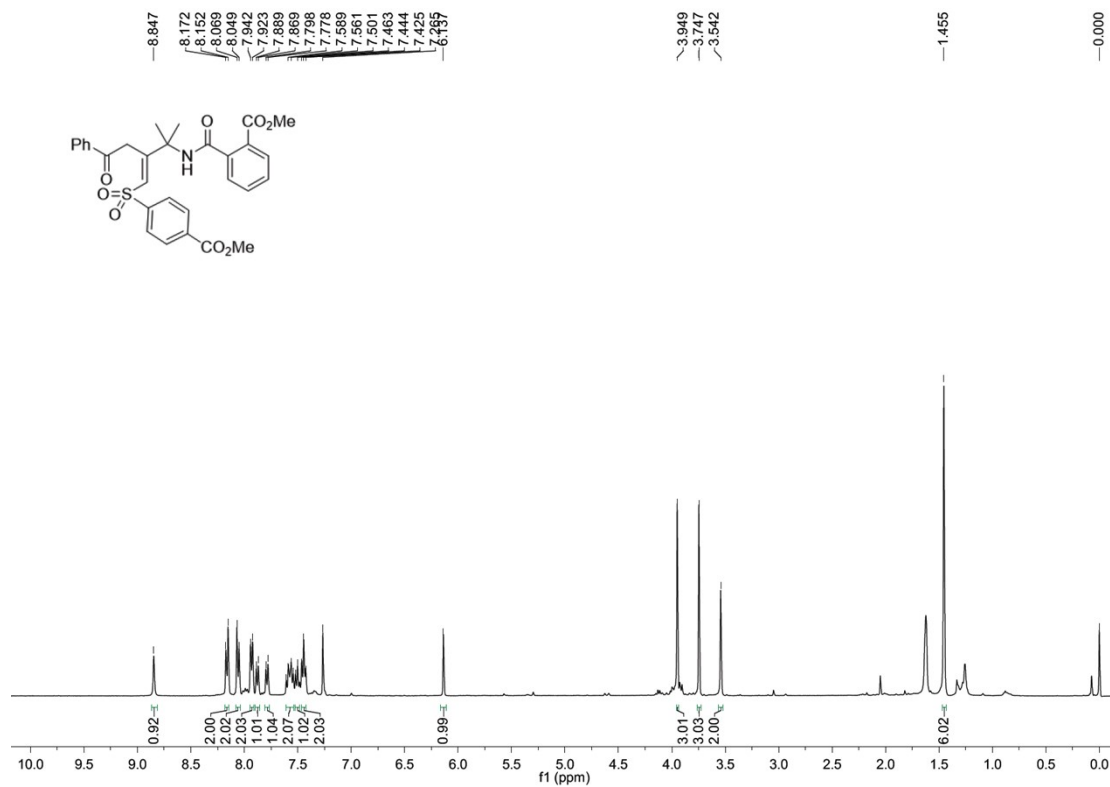

**5e-<sup>13</sup>C NMR (100 MHz, CDCl<sub>3</sub>)**

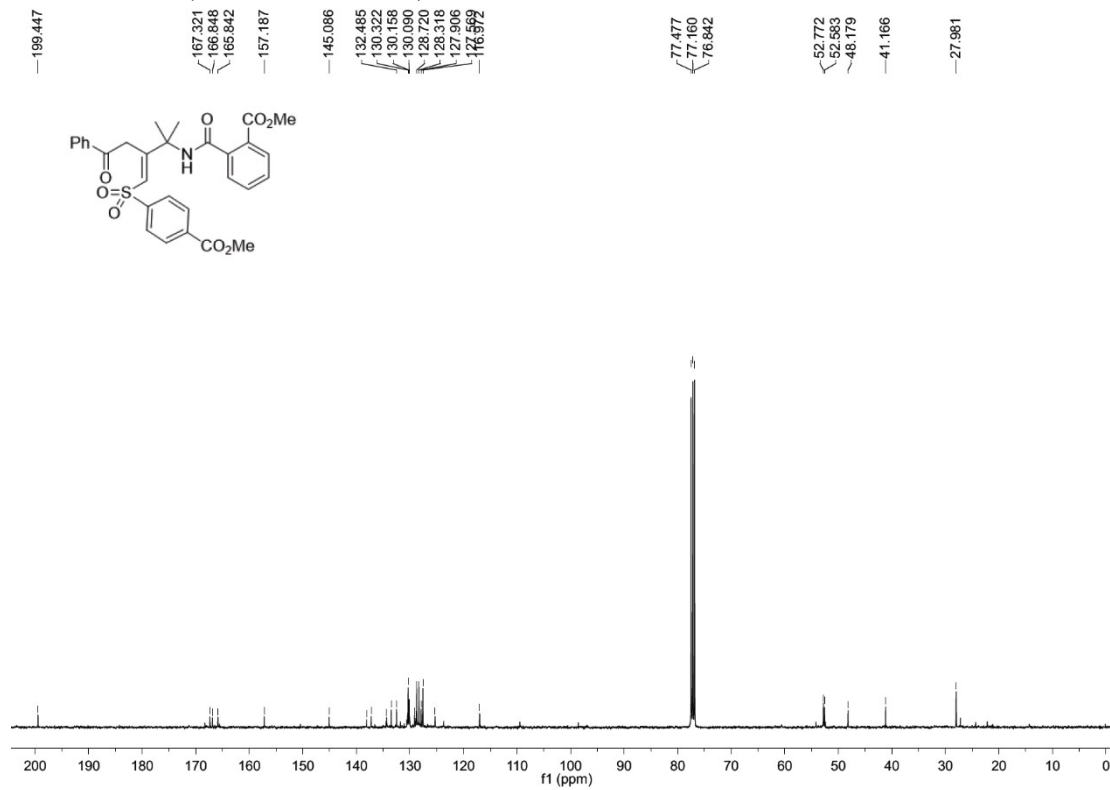

### 5f-<sup>1</sup>H NMR (400 MHz, CDCl<sub>3</sub>)

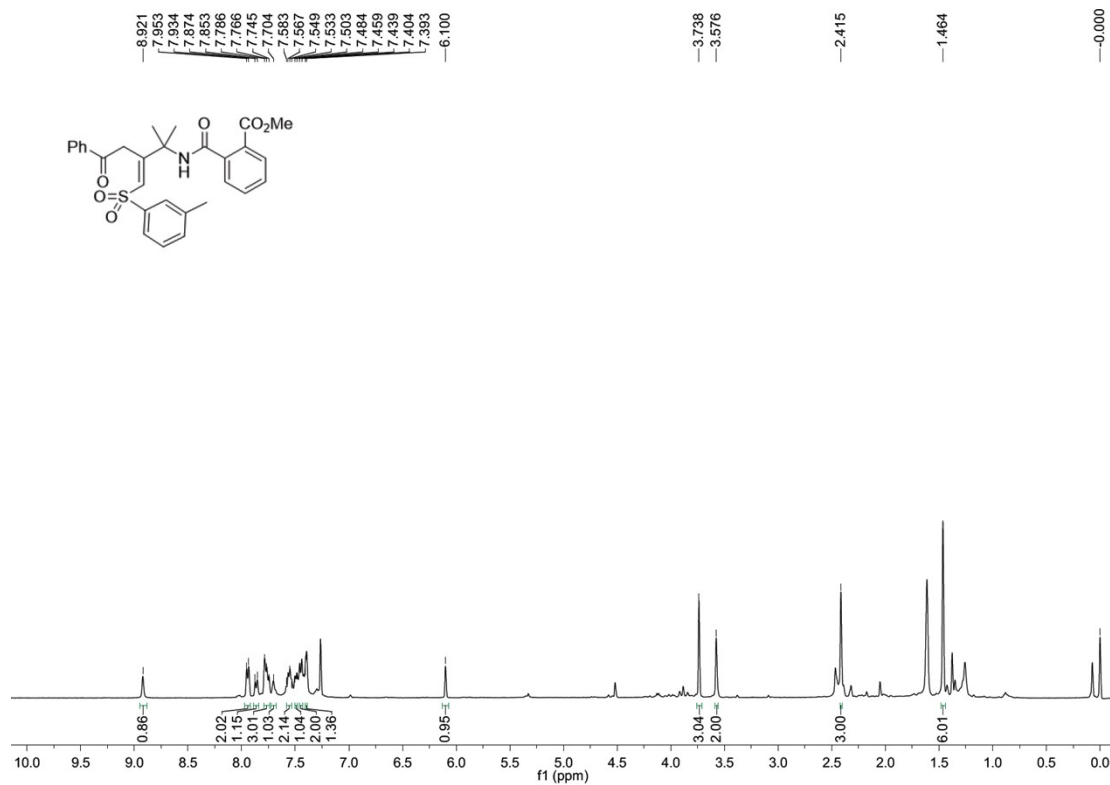

### 5f-<sup>13</sup>C NMR (100 MHz, CDCl<sub>3</sub>)

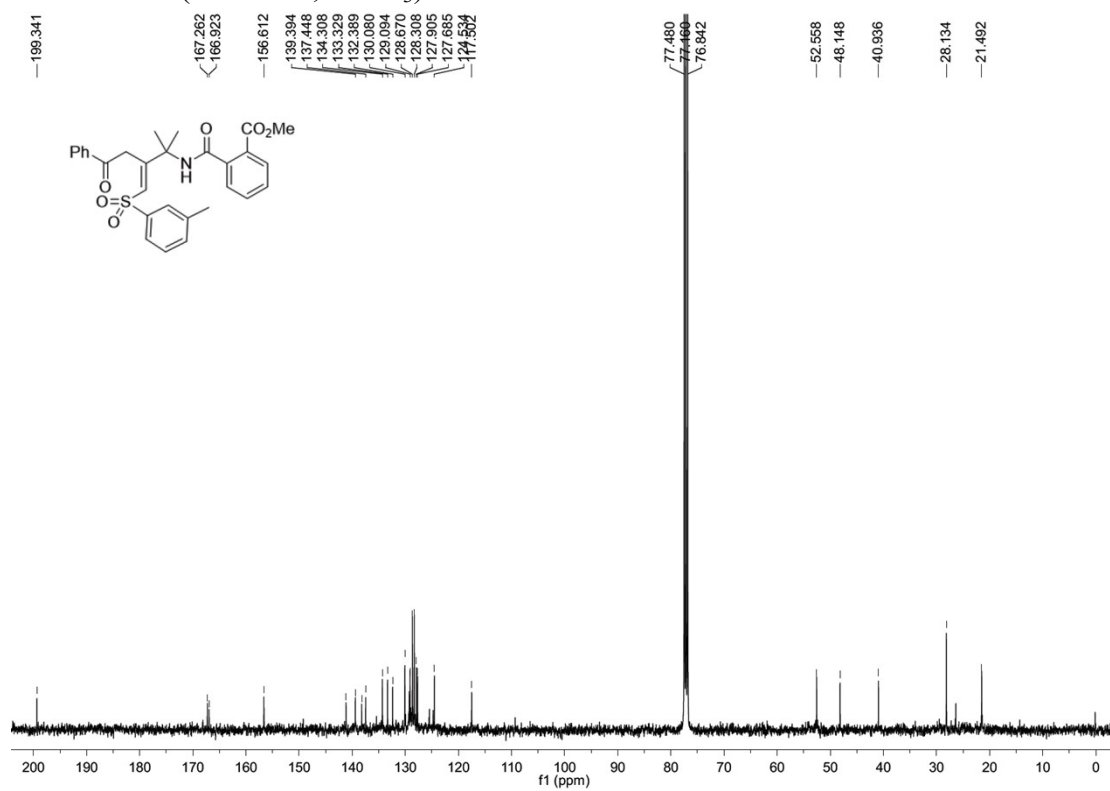

### 5g-<sup>1</sup>H NMR (400 MHz, CDCl<sub>3</sub>)

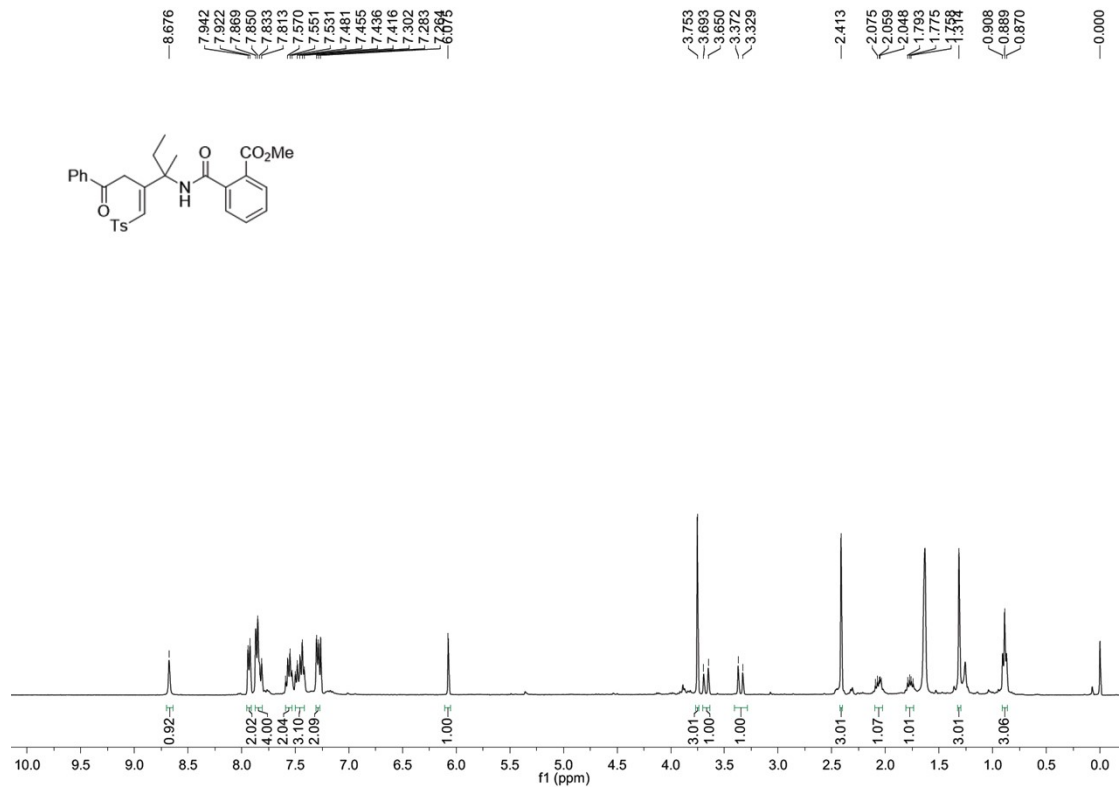

### 5g-<sup>13</sup>C NMR (100 MHz, CDCl<sub>3</sub>)

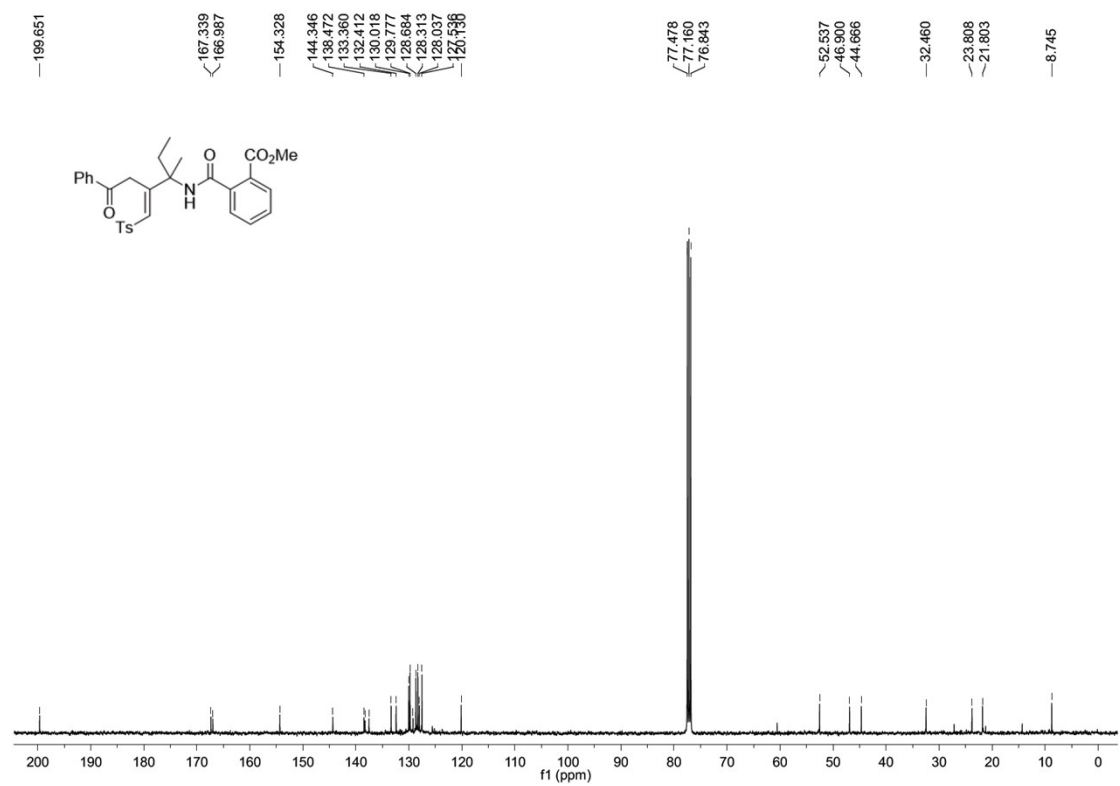

**5h-<sup>1</sup>H NMR (400 MHz, CDCl<sub>3</sub>)**

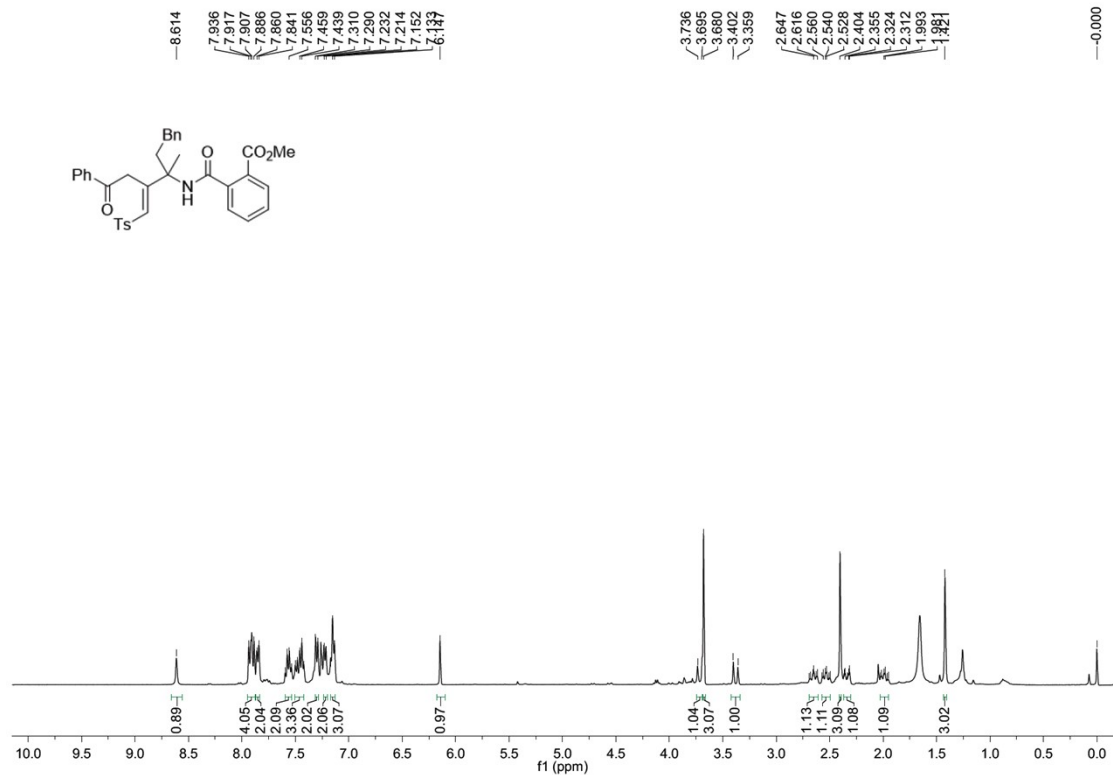

**5h-<sup>13</sup>C NMR (100 MHz, CDCl<sub>3</sub>)**

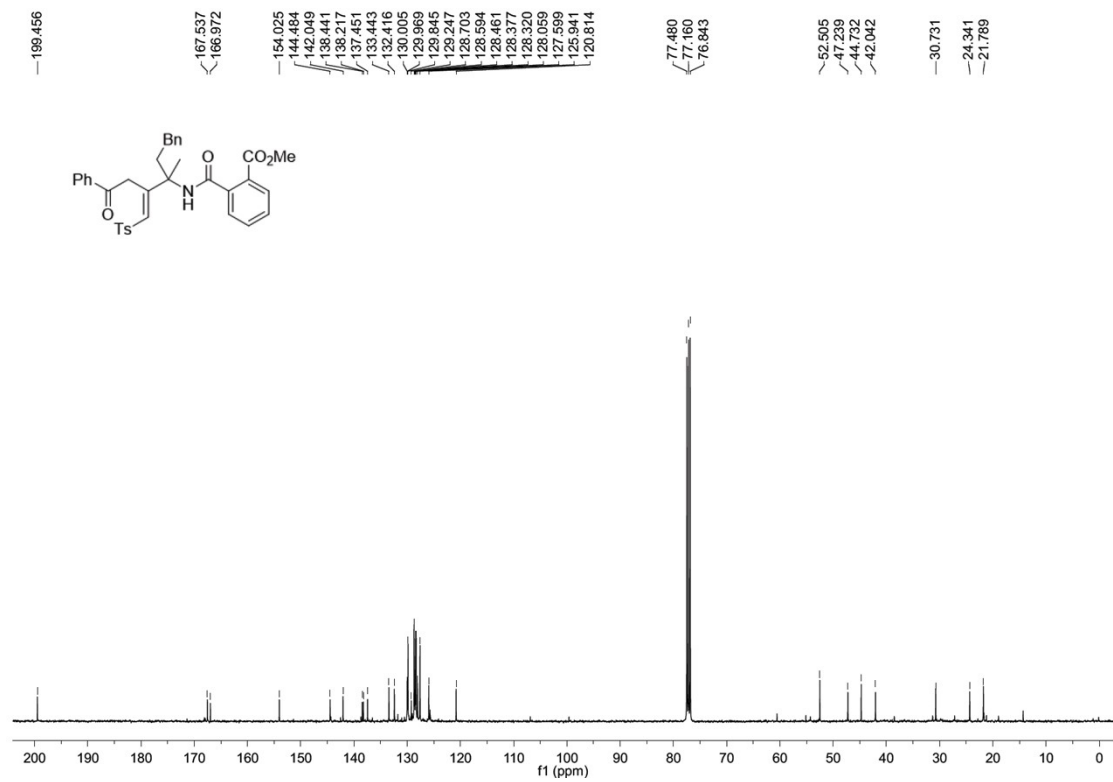

**5i-<sup>1</sup>H NMR (400 MHz, DMSO-*d*<sub>6</sub>)**

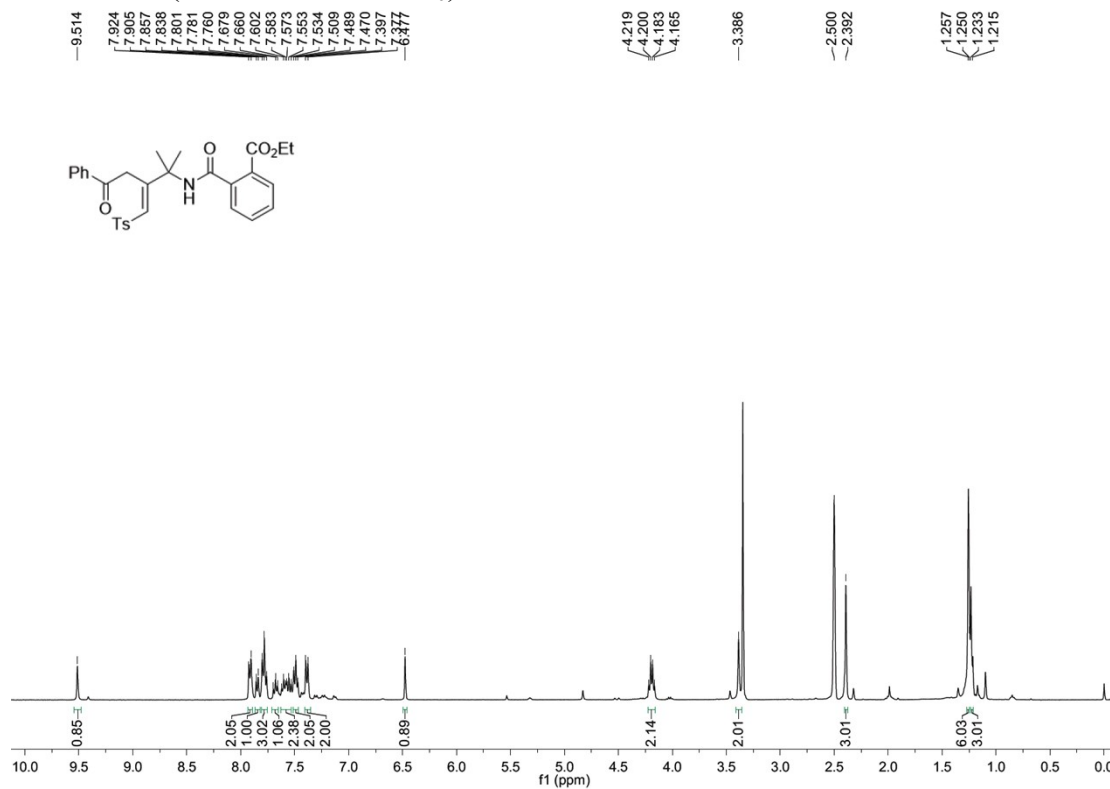

**5i-<sup>13</sup>C NMR (100 MHz, CDCl<sub>3</sub>)**

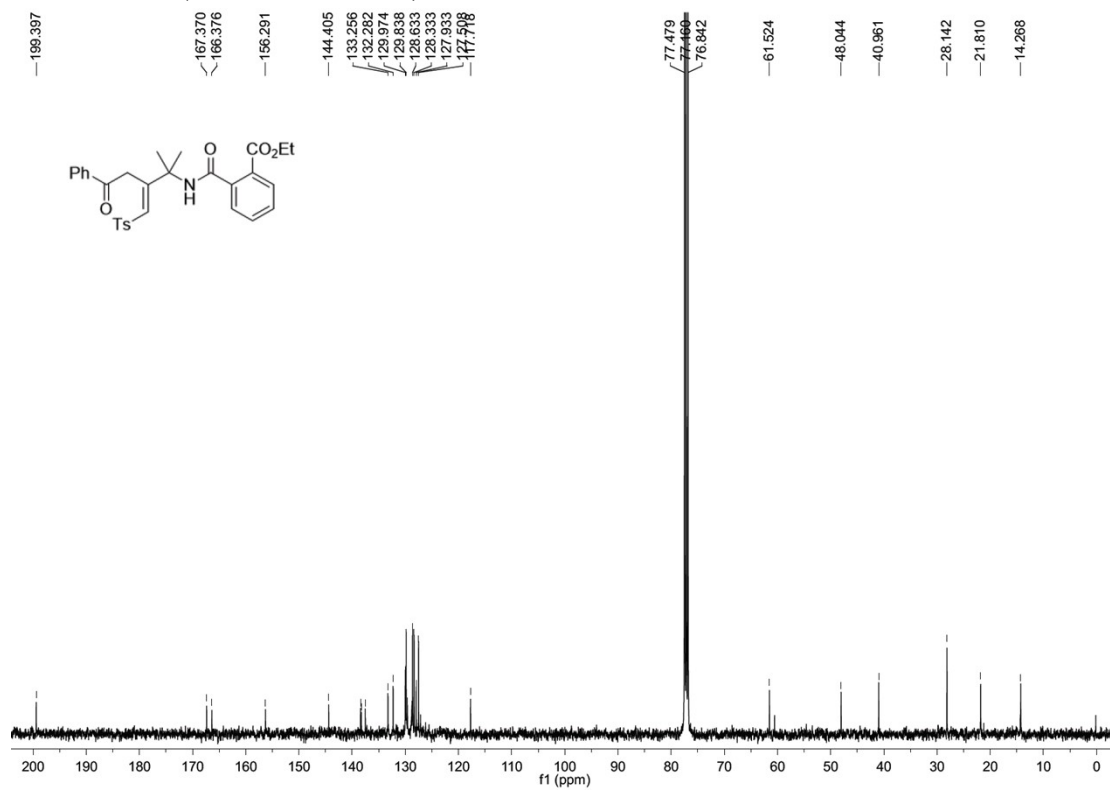

**5j-<sup>1</sup>H NMR (400 MHz, CDCl<sub>3</sub>)**

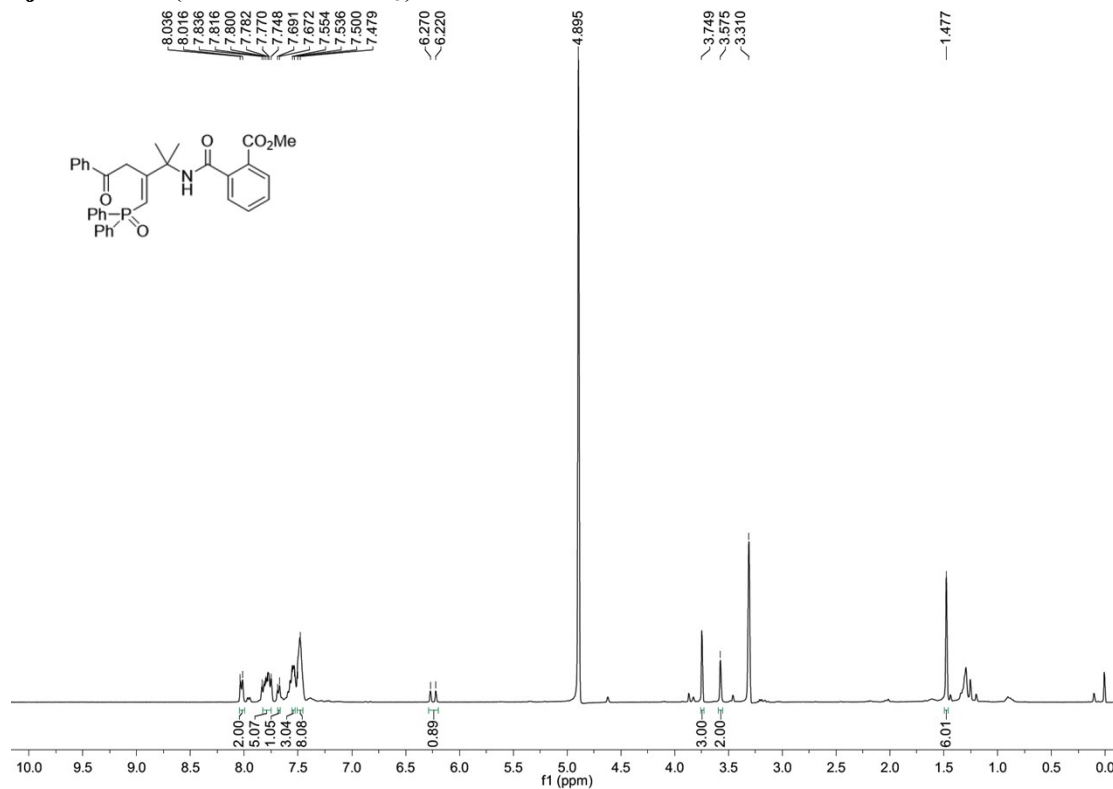

**5j-<sup>13</sup>C NMR (100 MHz, CDCl<sub>3</sub>)**

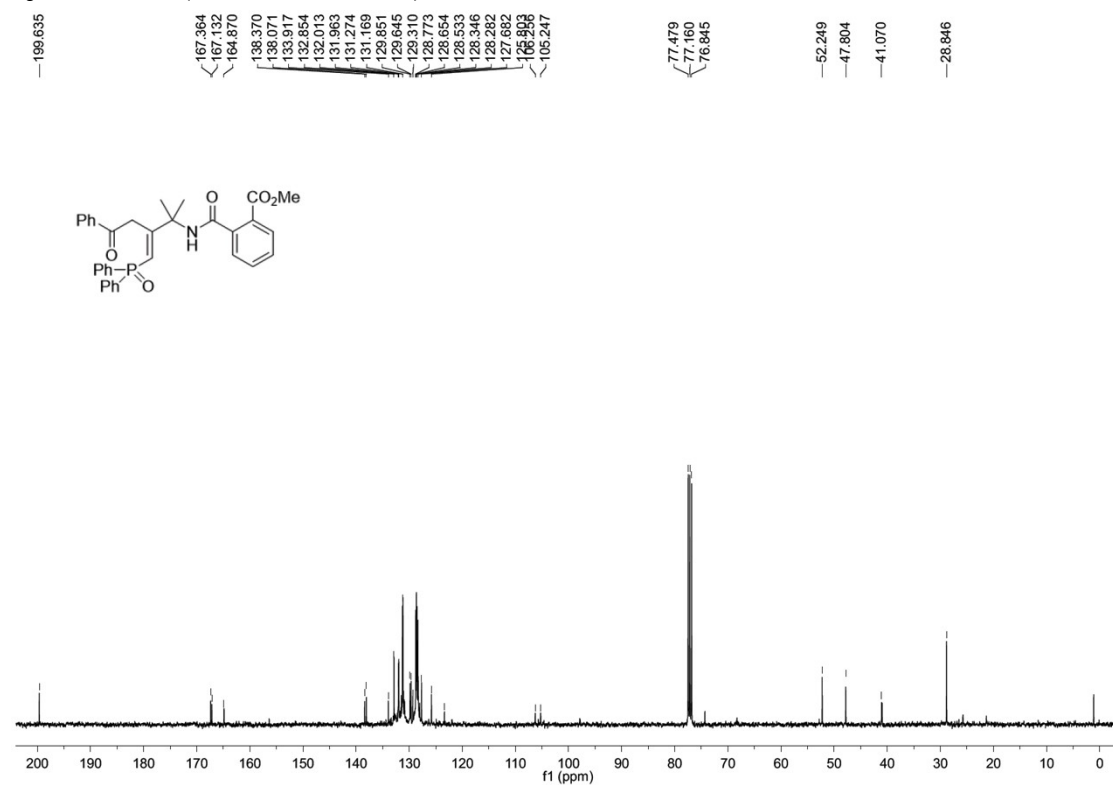



5j-<sup>31</sup>P NMR (162 MHz, CDCl<sub>3</sub>)

-27.374

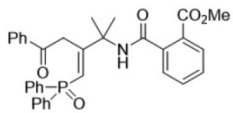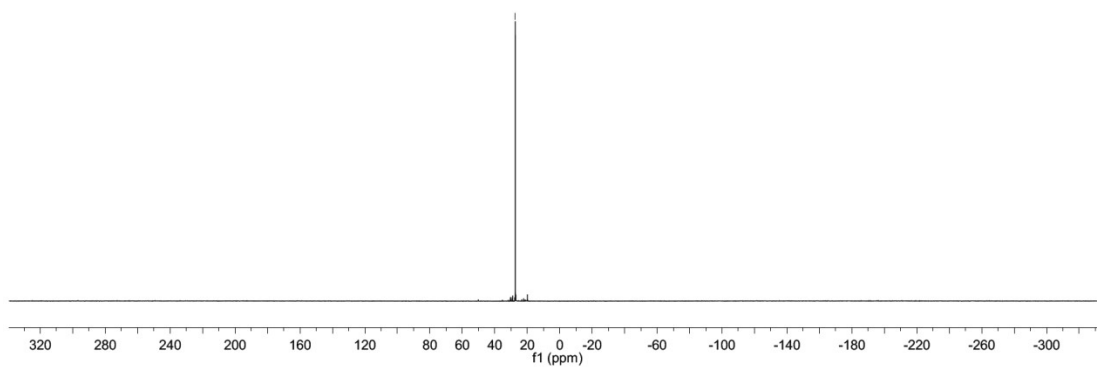

**5k-<sup>1</sup>H NMR (400 MHz, CDCl<sub>3</sub>)**

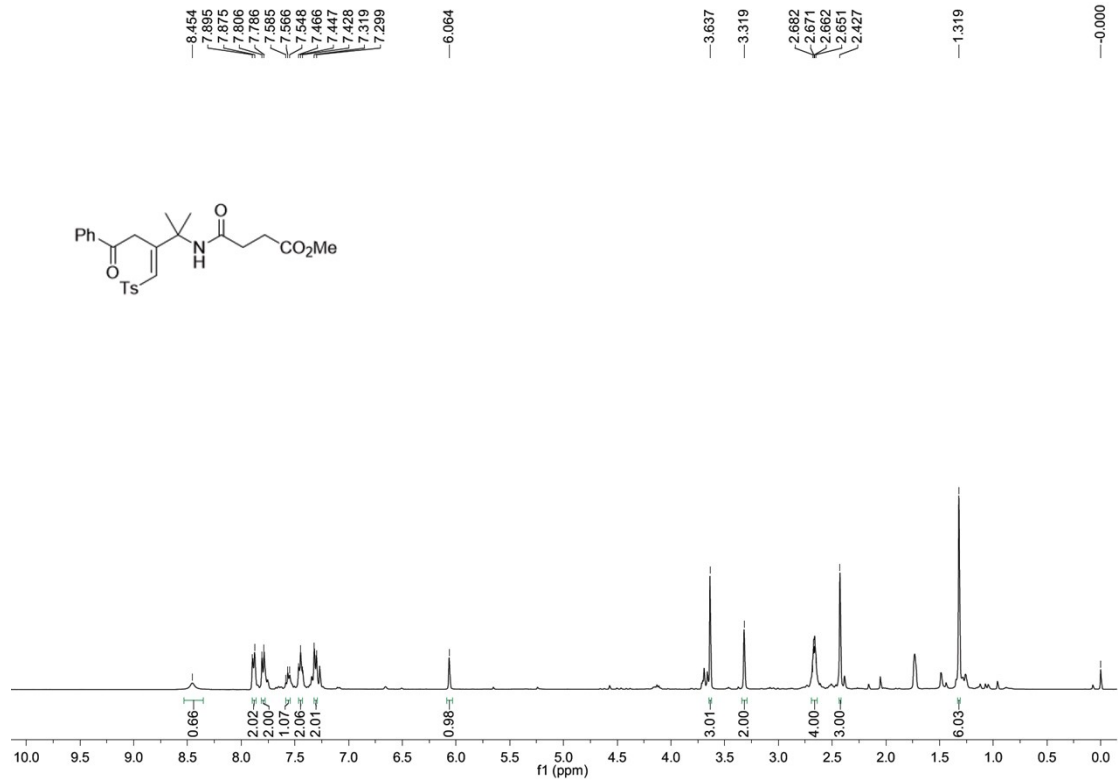

**5k-<sup>13</sup>C NMR (100 MHz, CDCl<sub>3</sub>)**

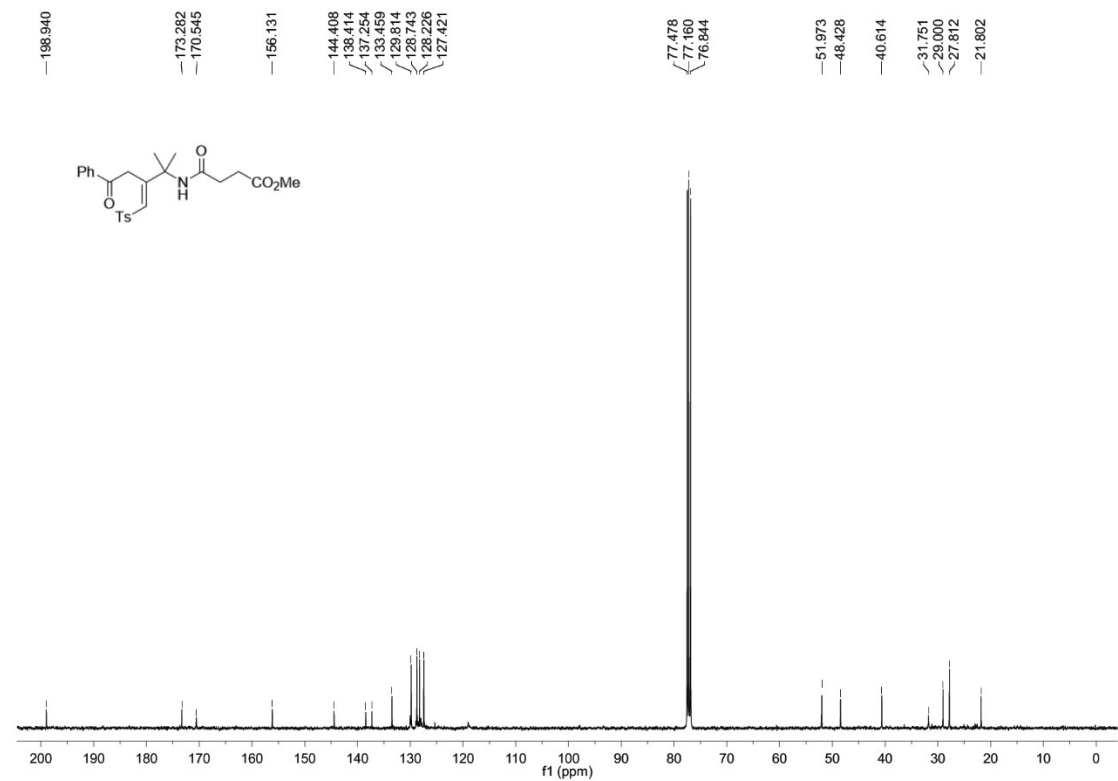

# 1H-1H NOESY of 5k:

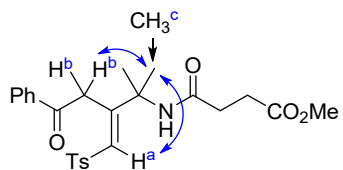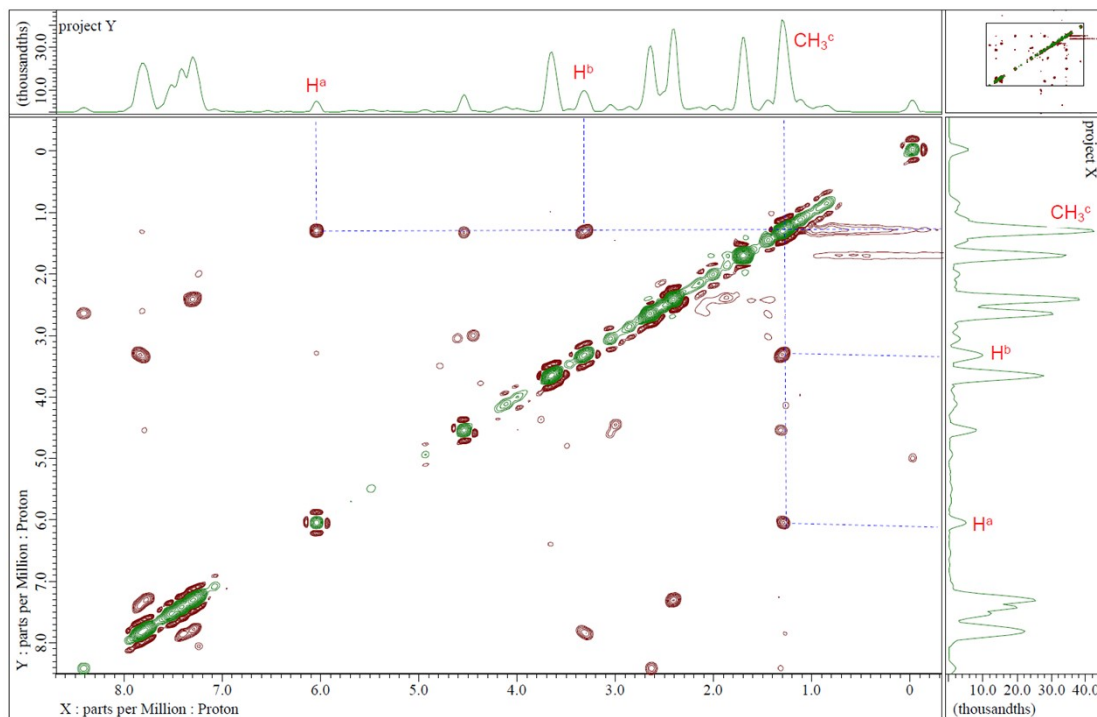

**5I-<sup>1</sup>H NMR (400 MHz, CDCl<sub>3</sub>)**

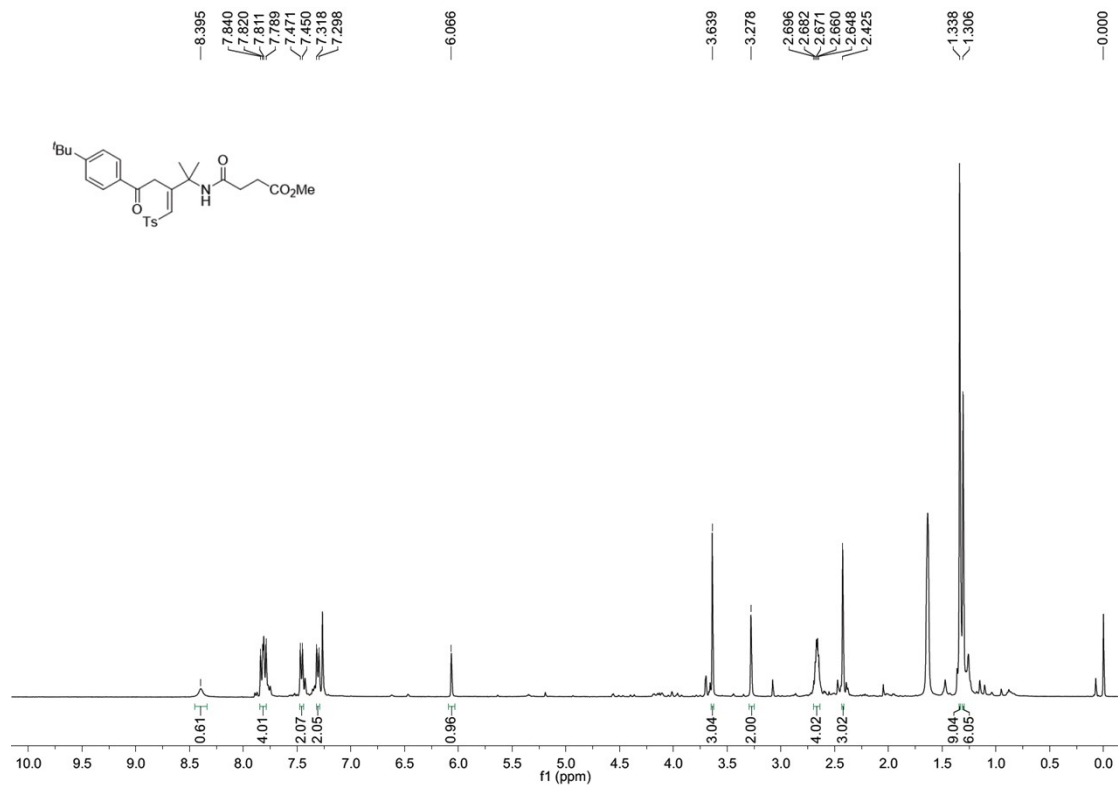

**5I-<sup>13</sup>C NMR (100 MHz, CDCl<sub>3</sub>)**

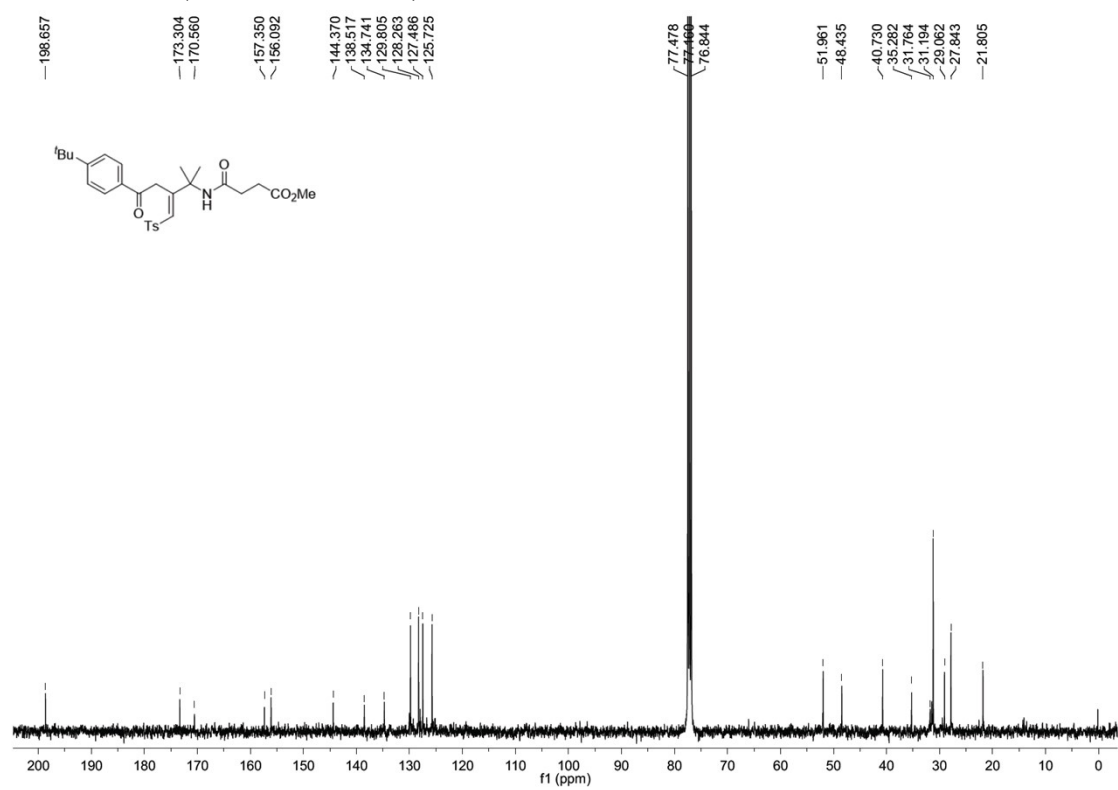

### 5m-<sup>1</sup>H NMR (400 MHz, CDCl<sub>3</sub>)

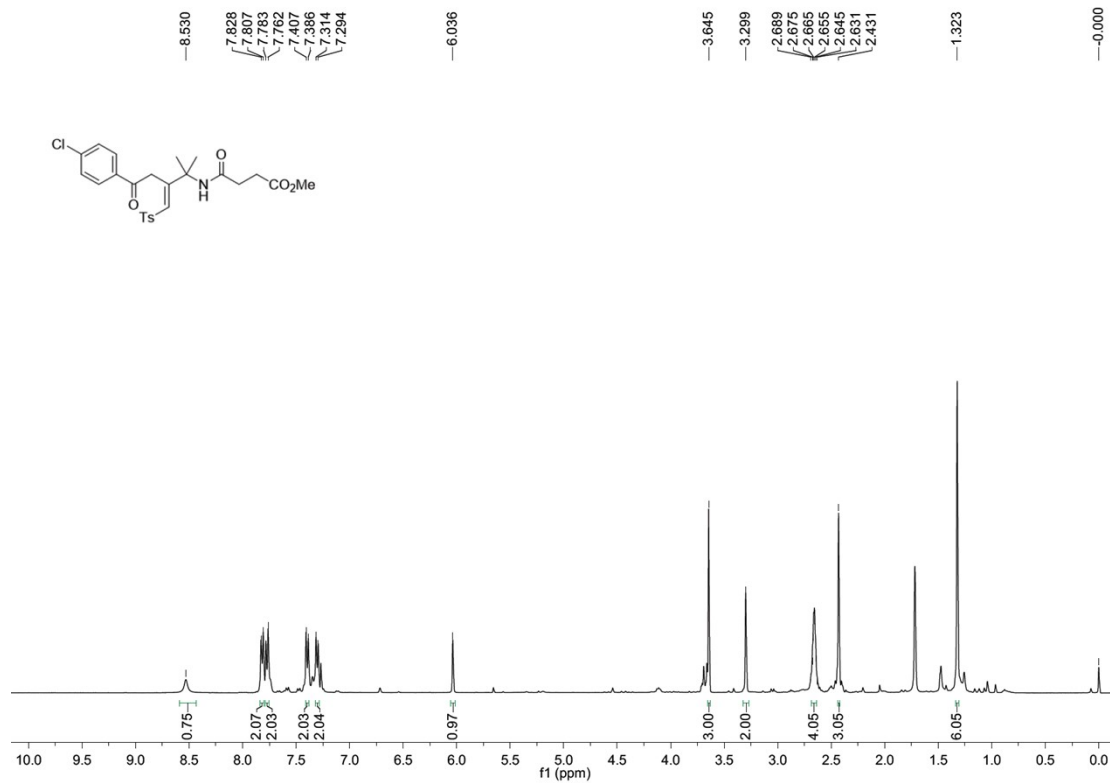

### 5m-<sup>13</sup>C NMR (100 MHz, CDCl<sub>3</sub>)

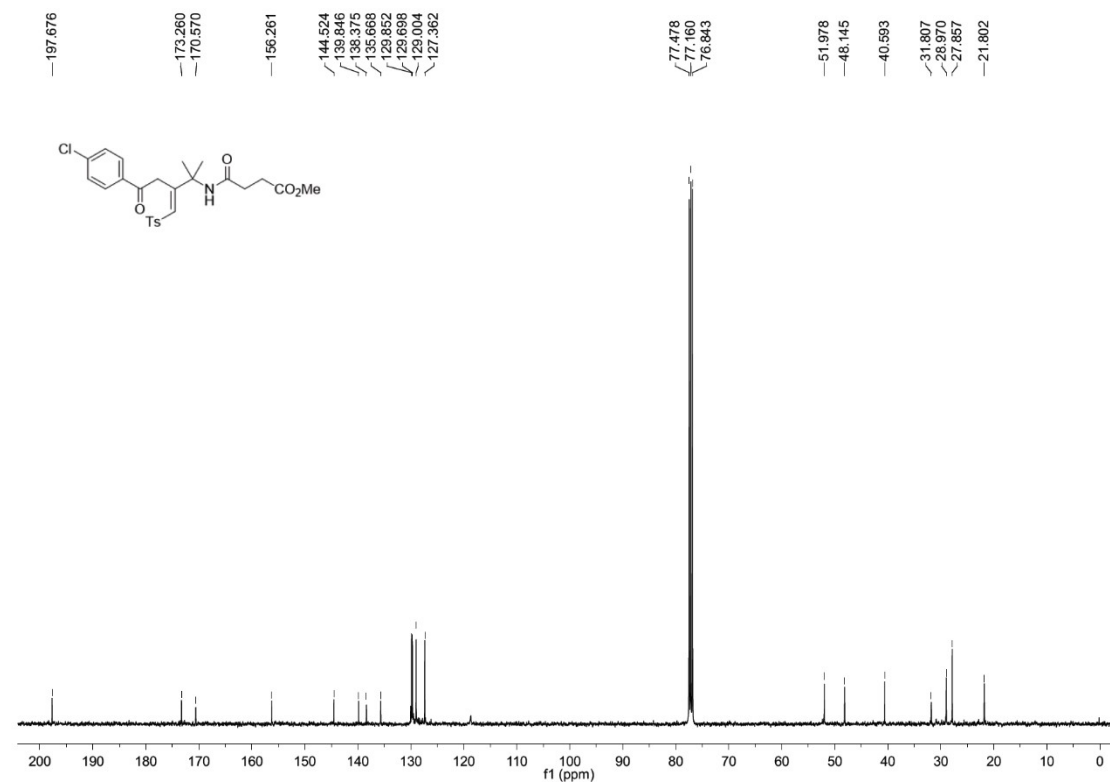

**5n-<sup>1</sup>H NMR (400 MHz, CDCl<sub>3</sub>)**

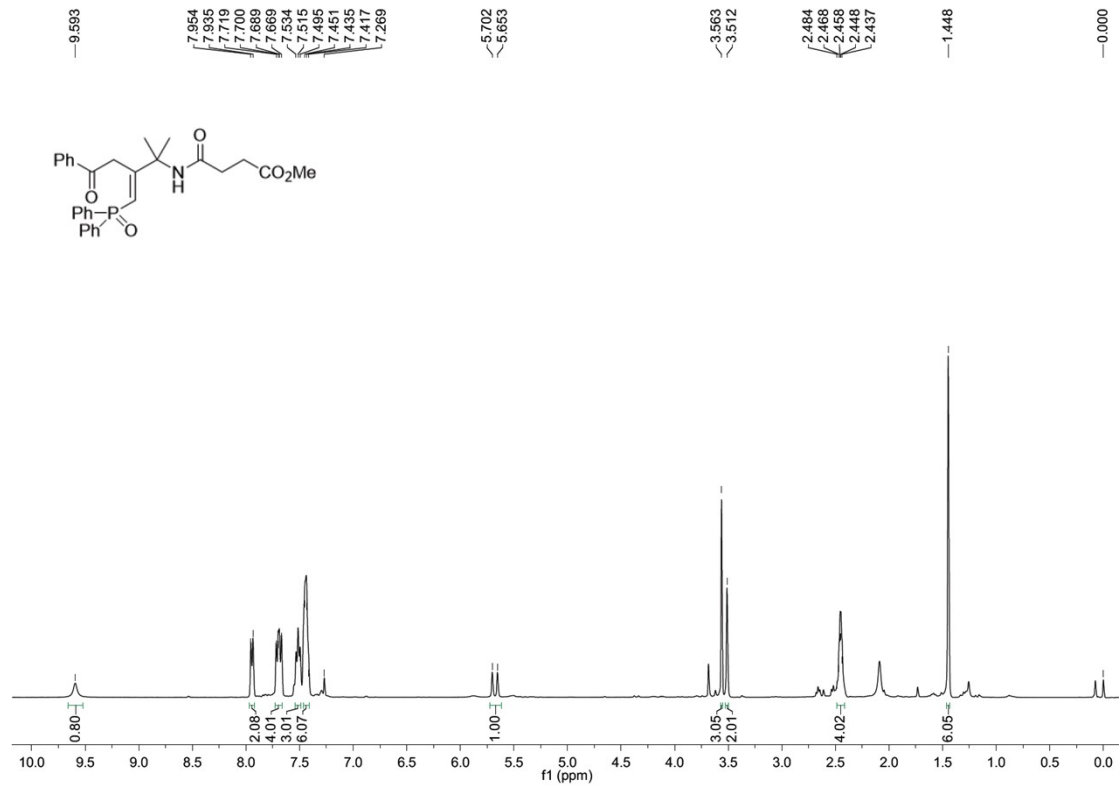

**5n-<sup>13</sup>C NMR (100 MHz, CDCl<sub>3</sub>)**

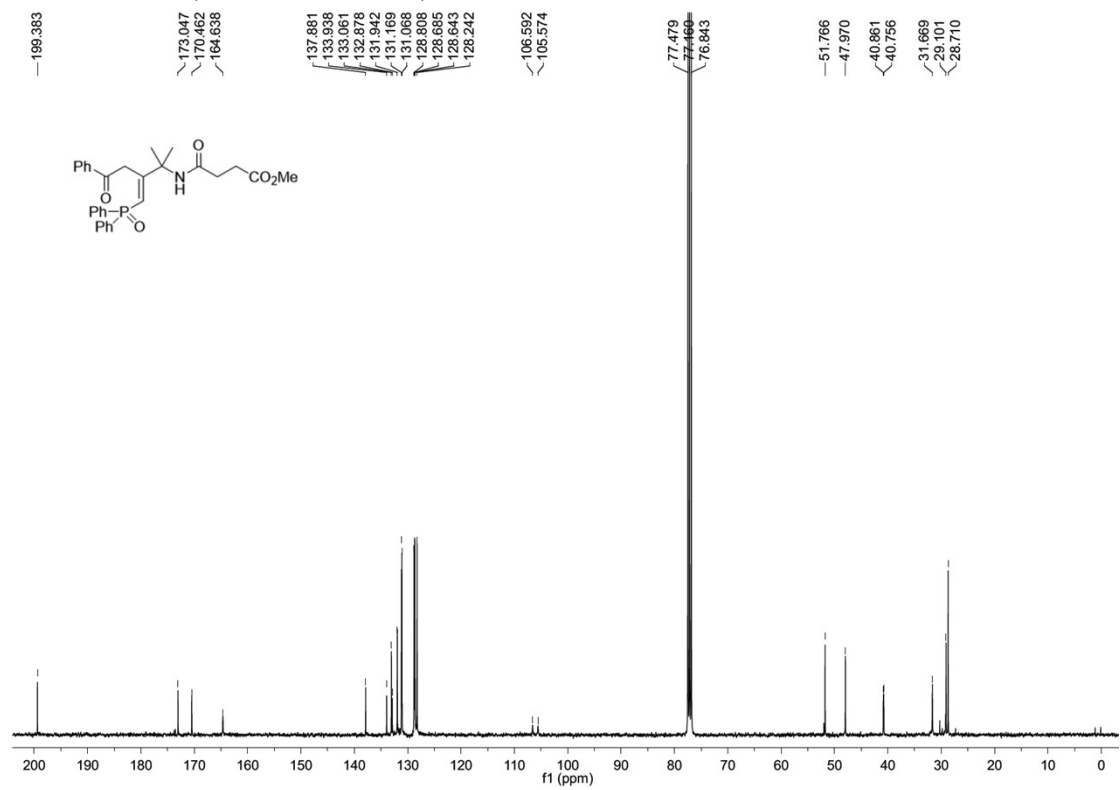

**5n**-<sup>31</sup>P NMR (162 MHz, CDCl<sub>3</sub>)

-26.754

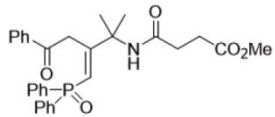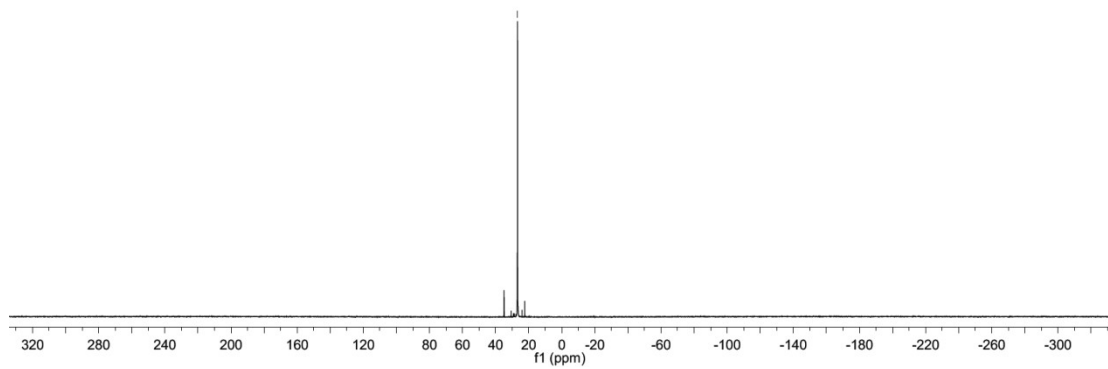

**6-<sup>1</sup>H NMR (400 MHz, CDCl<sub>3</sub>)**

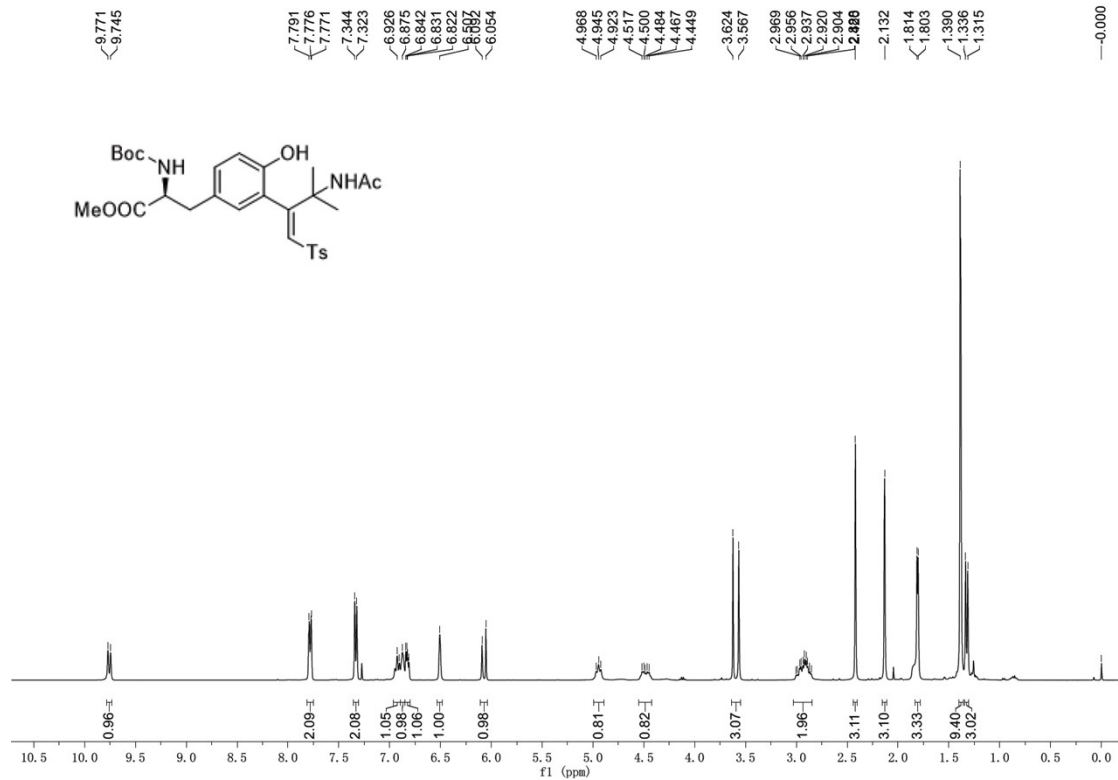

**6-<sup>13</sup>C NMR (100 MHz, CDCl<sub>3</sub>)**

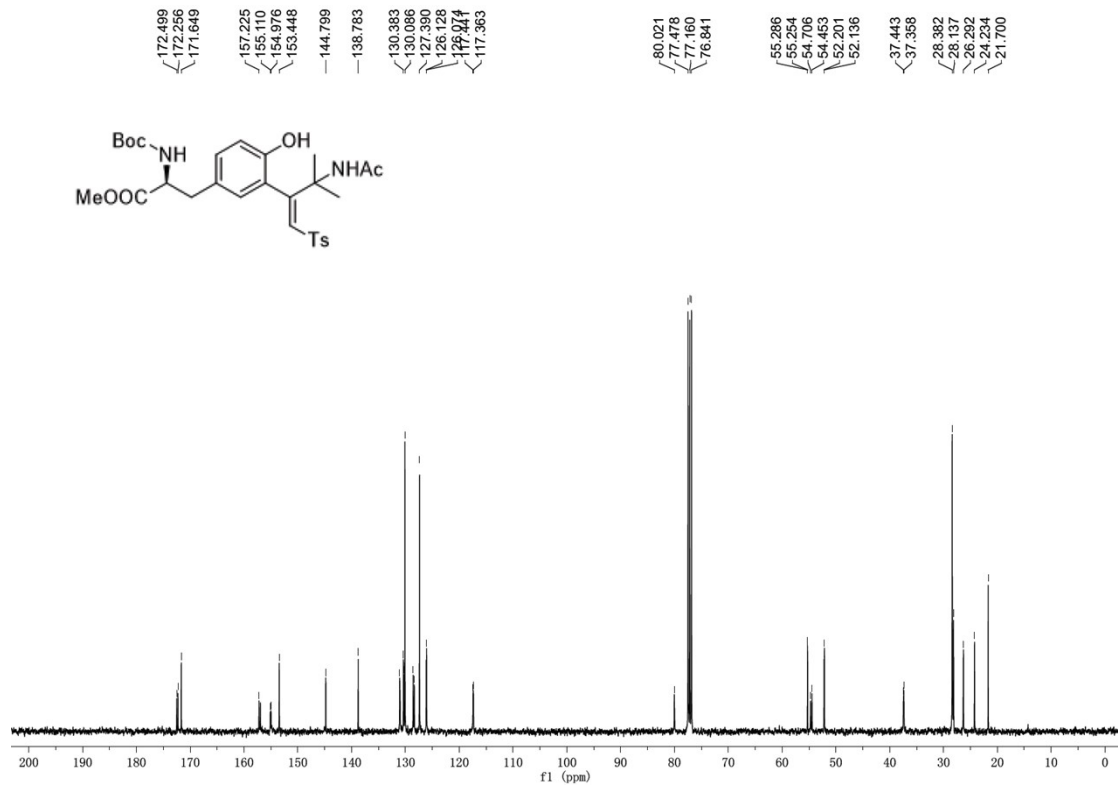



7-<sup>1</sup>H NMR (400 MHz, CDCl<sub>3</sub>)

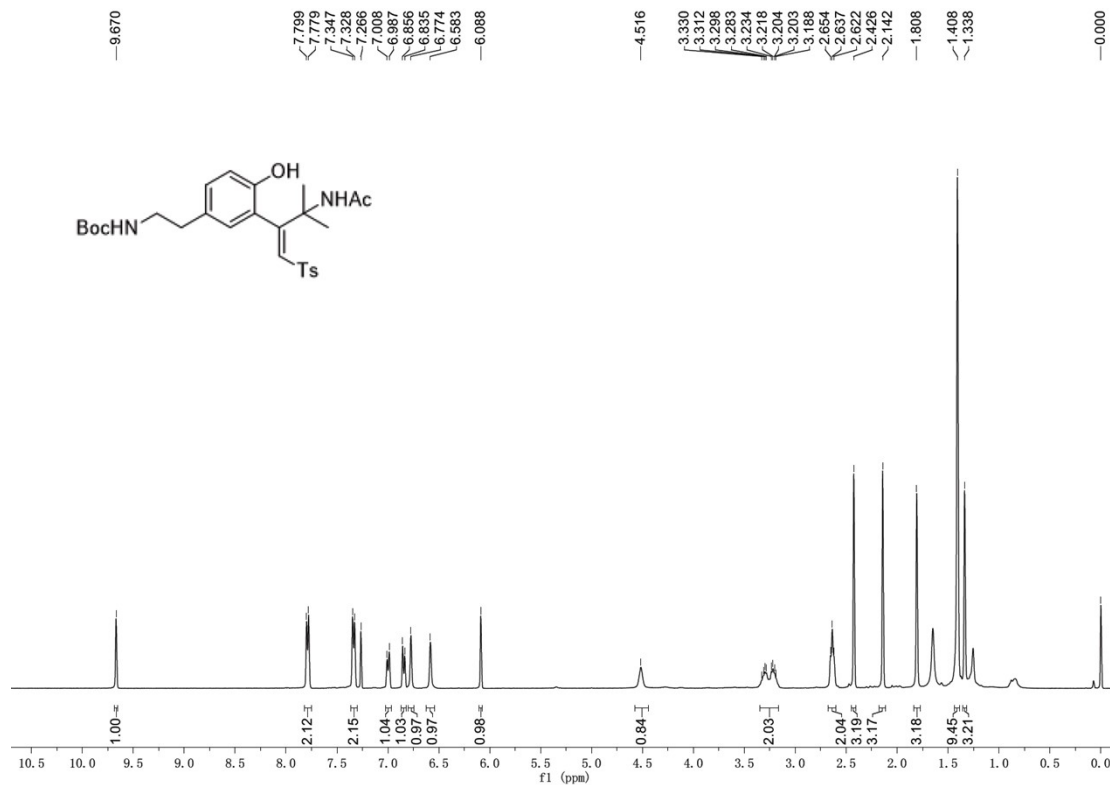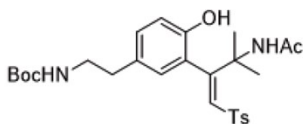

7-<sup>13</sup>C NMR (100 MHz, CDCl<sub>3</sub>)

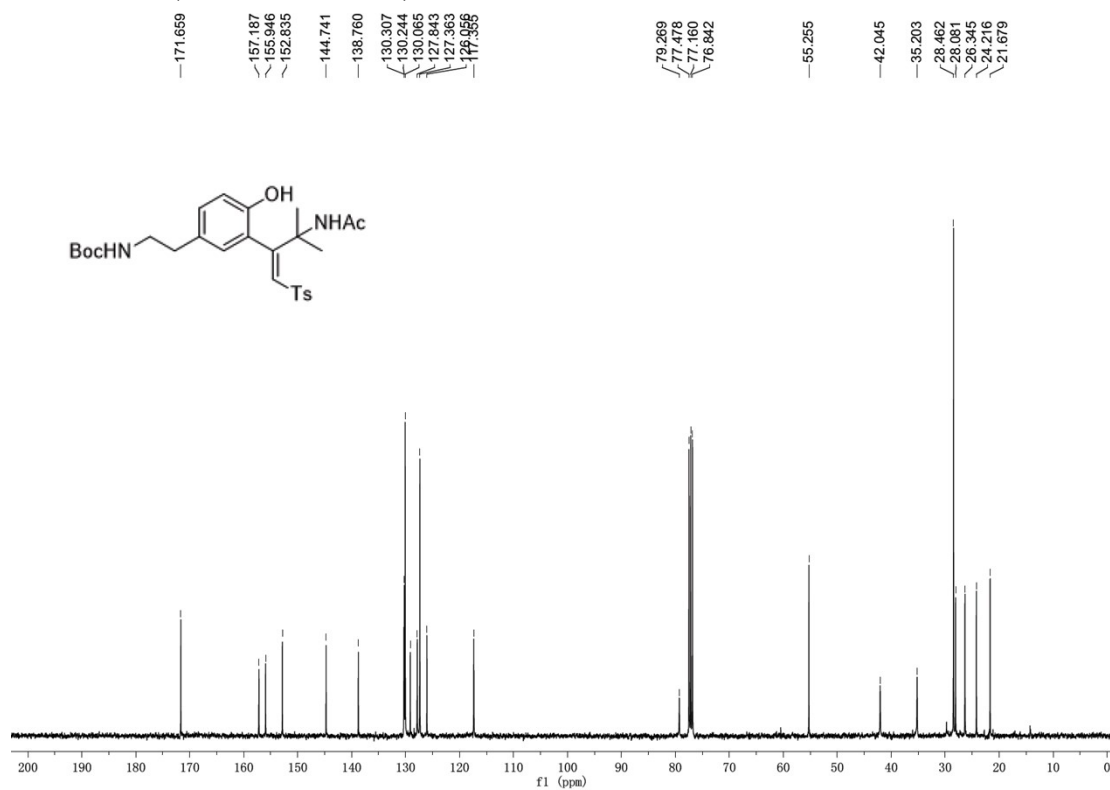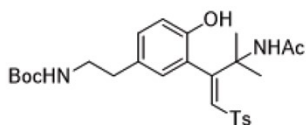

**8-<sup>1</sup>H NMR (400 MHz, CDCl<sub>3</sub>)**

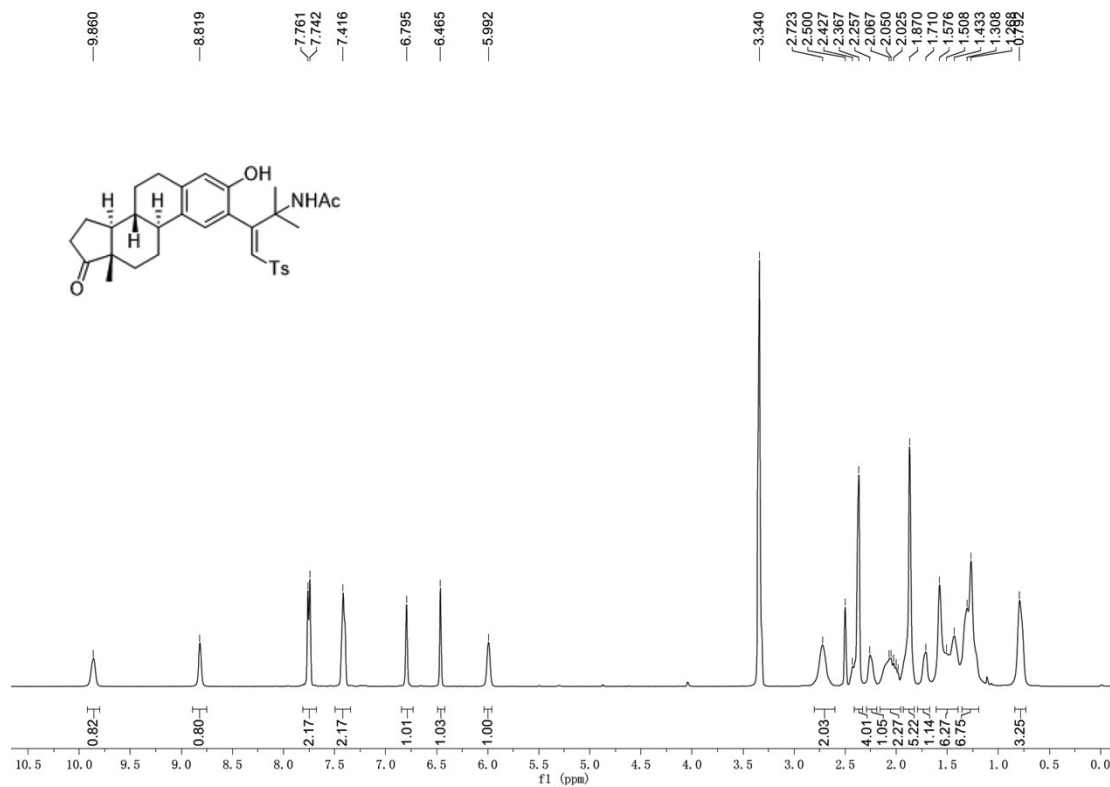

**8-<sup>13</sup>C NMR (100 MHz, CDCl<sub>3</sub>)**

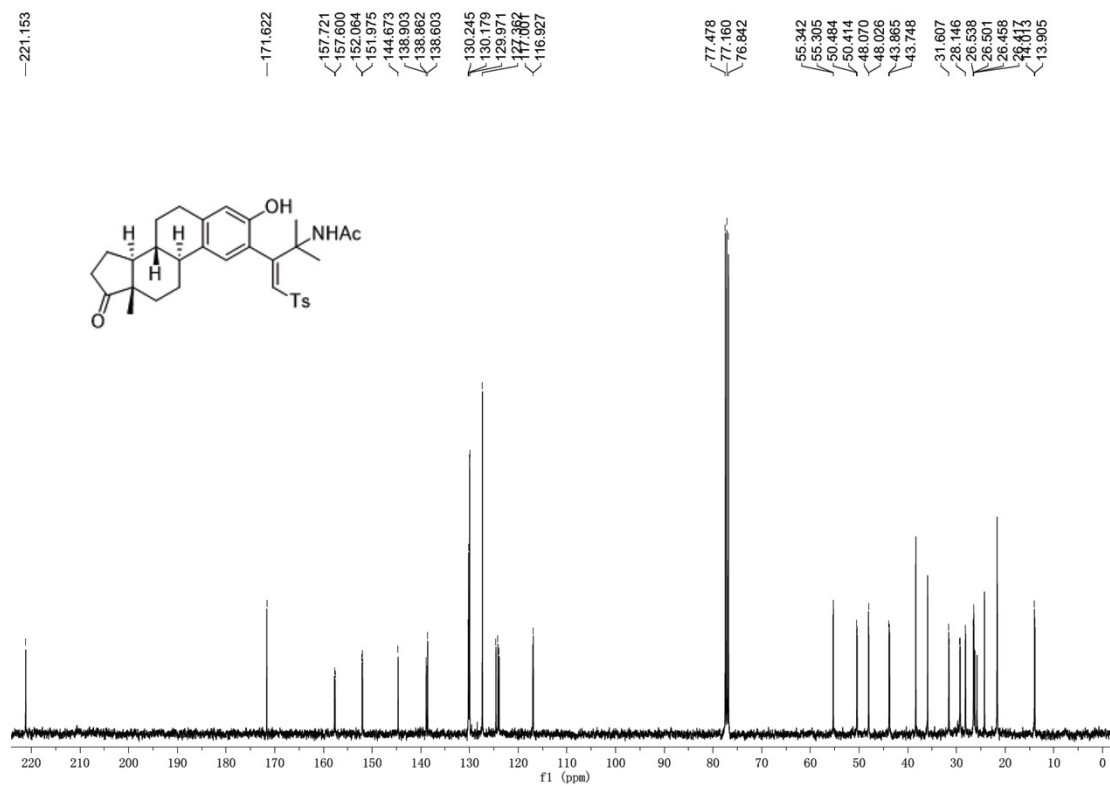

9-<sup>1</sup>H NMR (400 MHz, CDCl<sub>3</sub>)

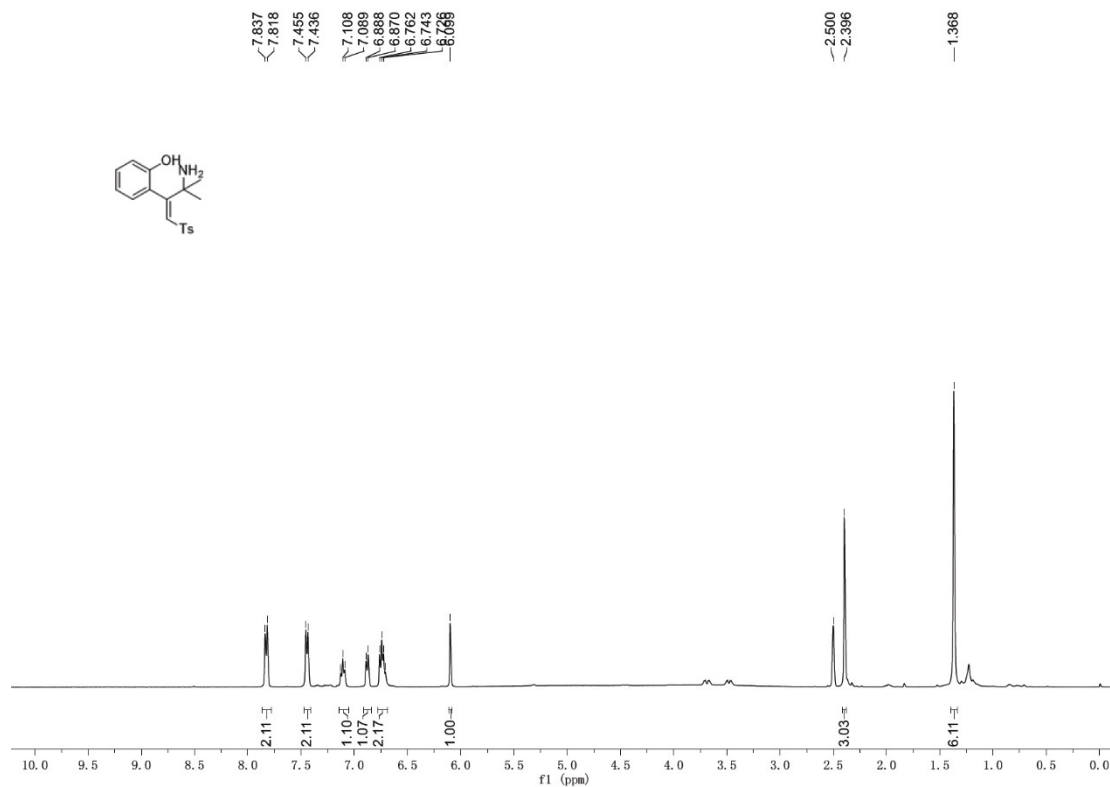

9-<sup>13</sup>C NMR (100 MHz, CDCl<sub>3</sub>)

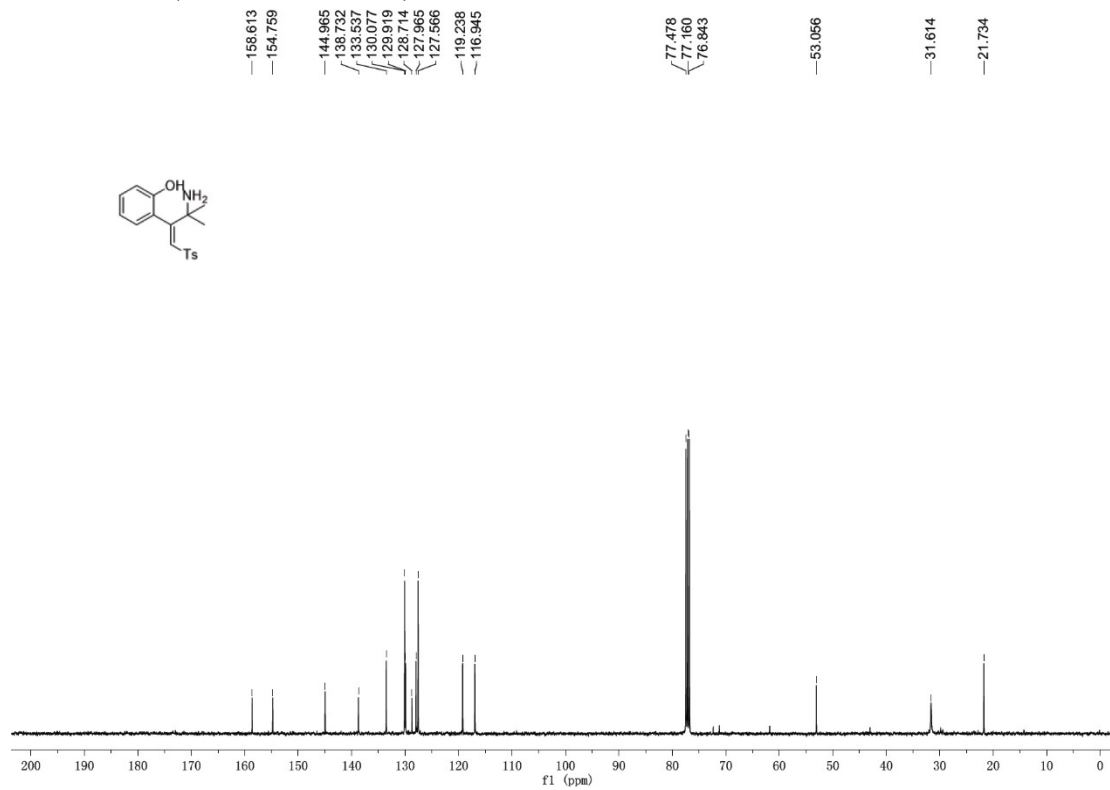

### 10-<sup>1</sup>H NMR (400 MHz, CDCl<sub>3</sub>)

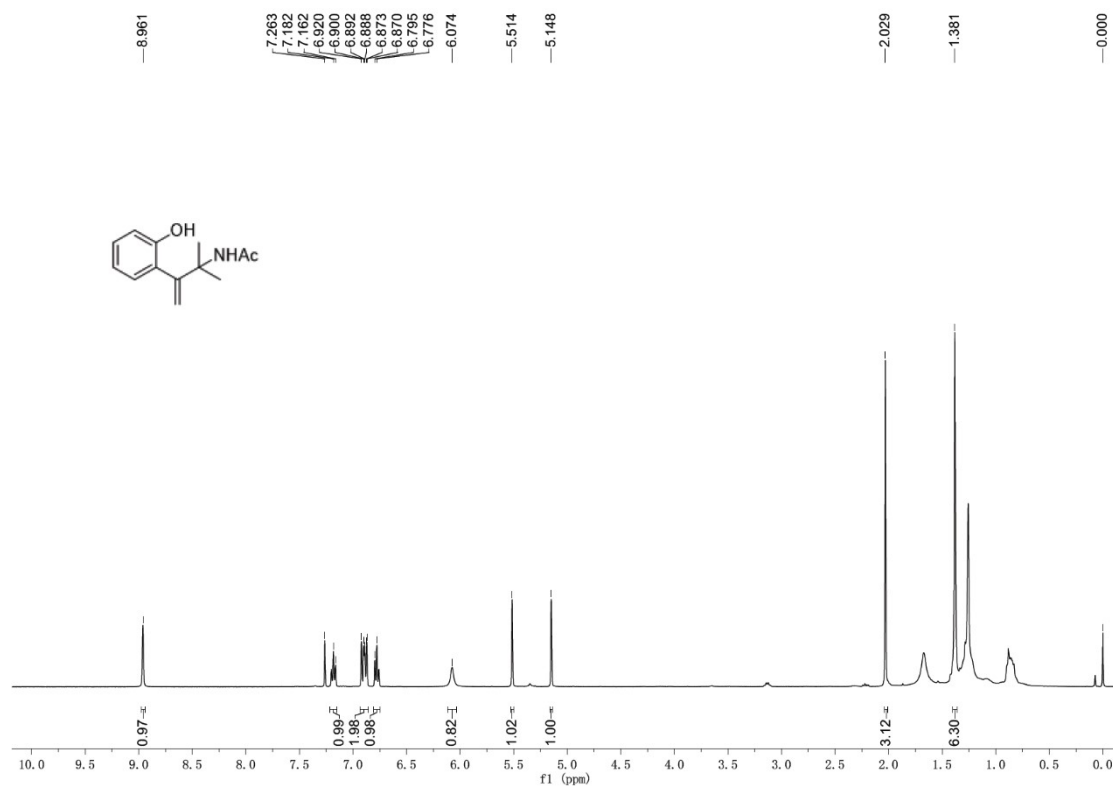

### 10-<sup>13</sup>C NMR (100 MHz, CDCl<sub>3</sub>)

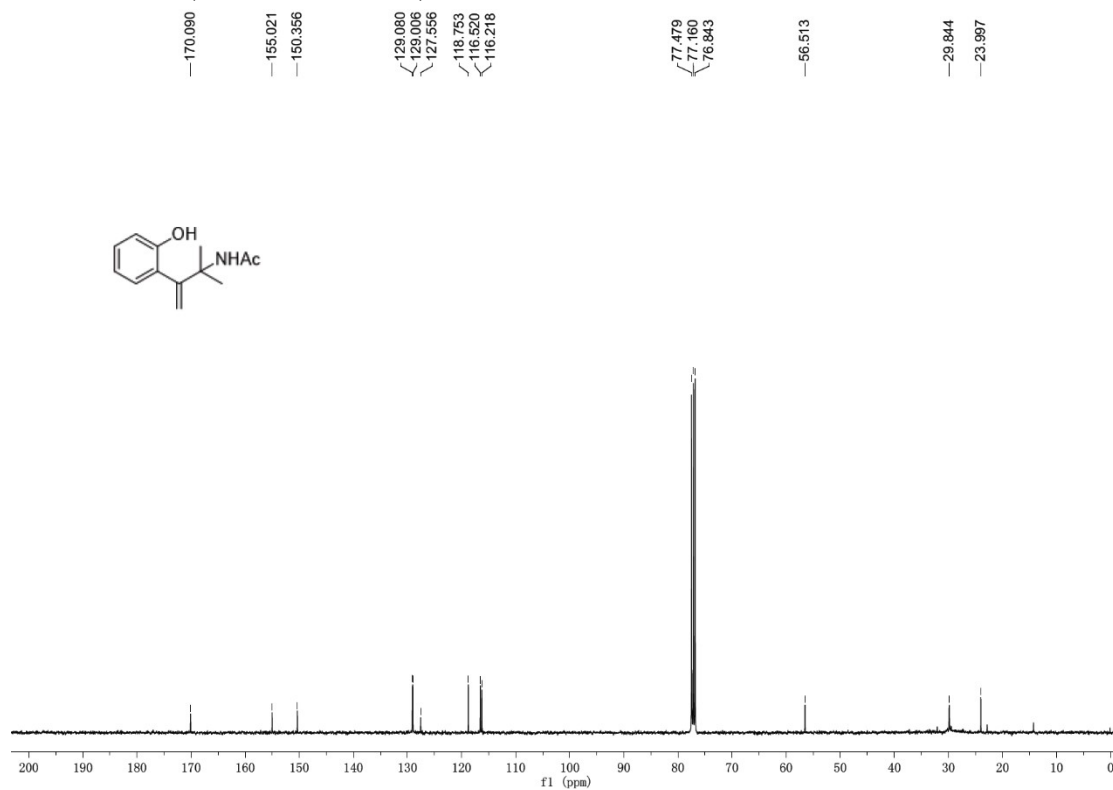

11-<sup>1</sup>H NMR (400 MHz, DMSO-*d*<sub>6</sub>)

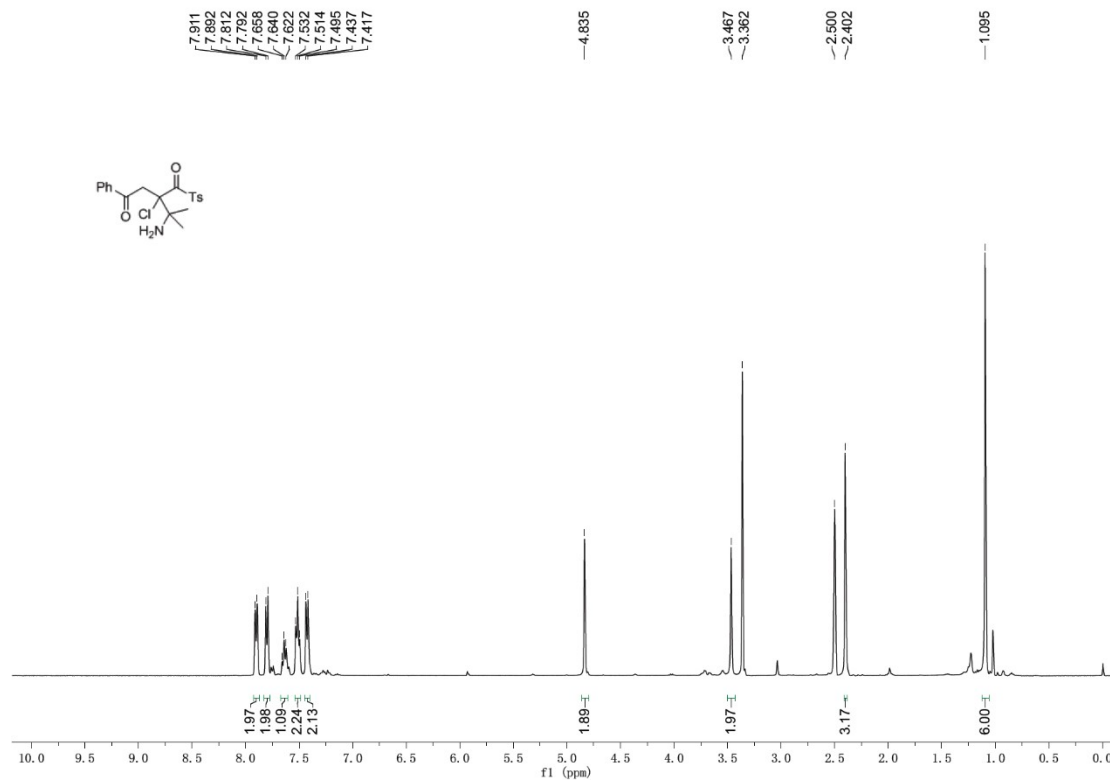

11-<sup>13</sup>C NMR (100 MHz, CDCl<sub>3</sub>)

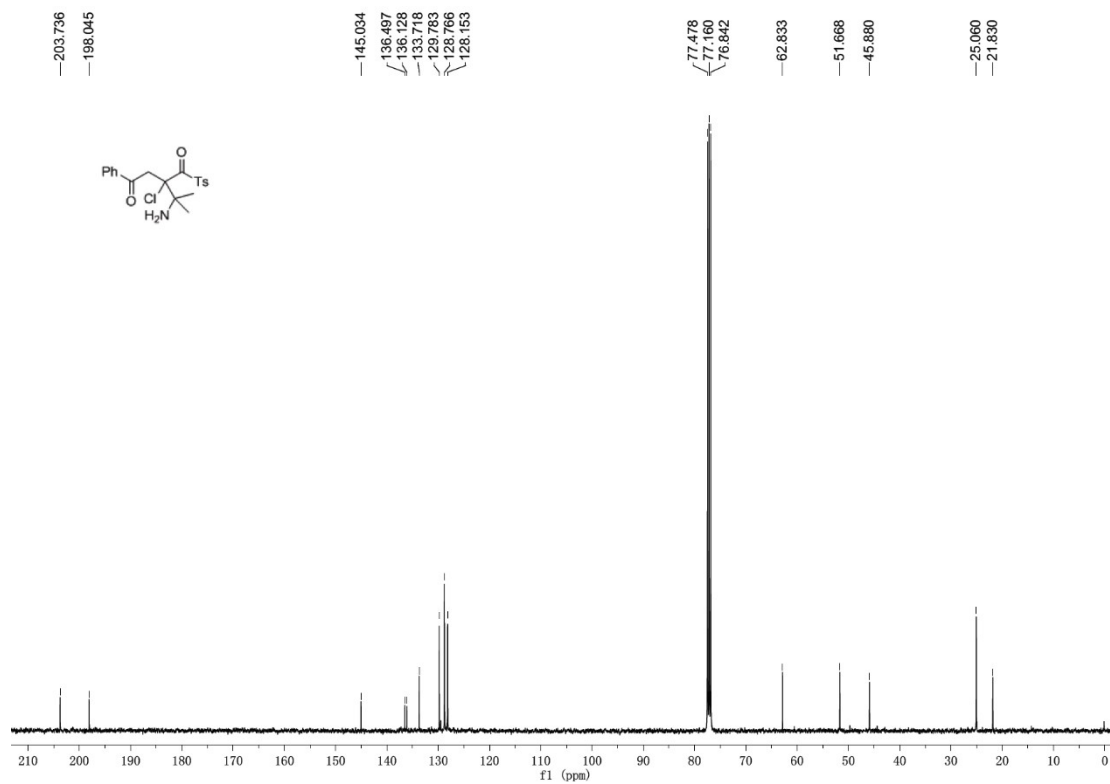

**3aa'**-<sup>1</sup>H NMR (400 MHz, CDCl<sub>3</sub>)

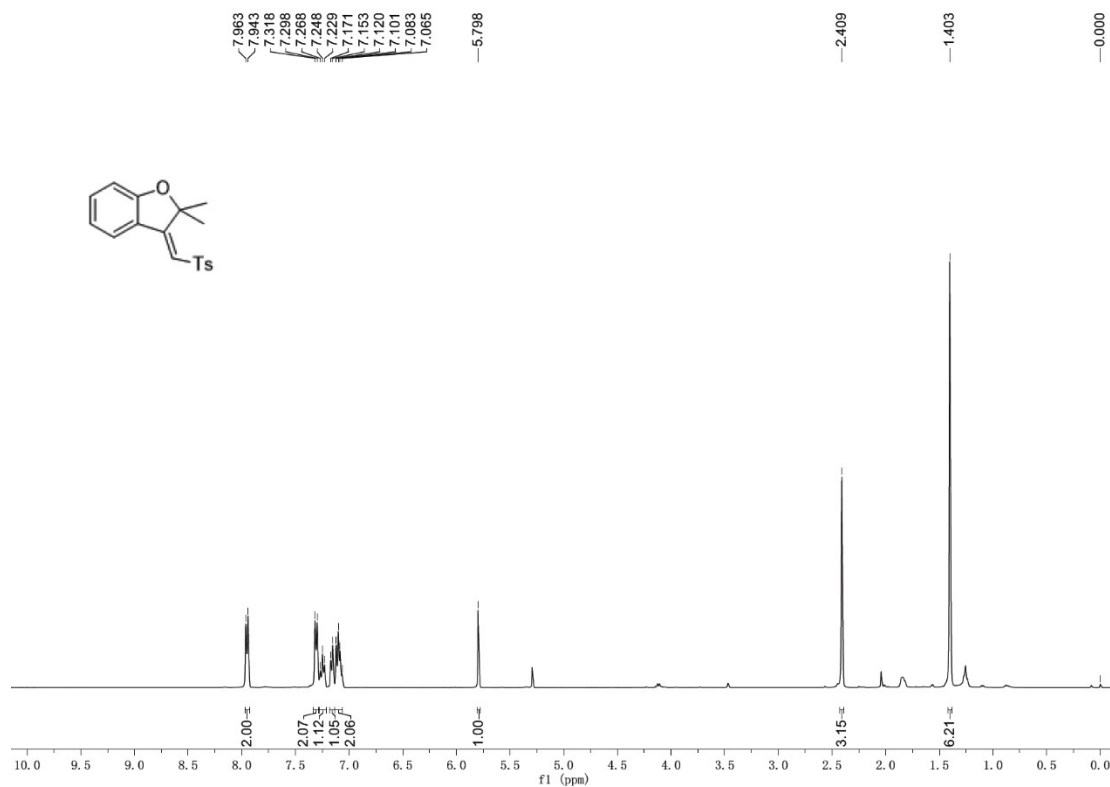

**3aa'**-<sup>13</sup>C NMR (100 MHz, CDCl<sub>3</sub>)

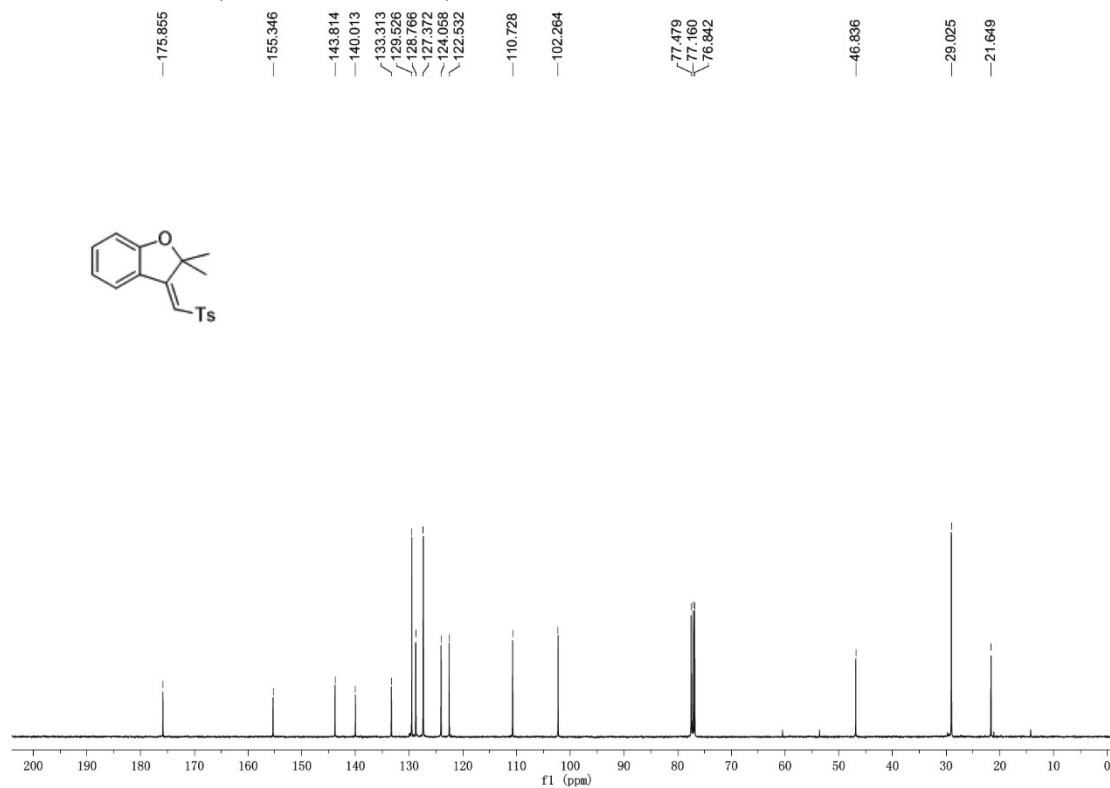

Supplement: d2cc02982k1.pdf [file d2cc02982k1.pdf]
